# Supplementary material for: AraCust: a Saudi Telecom Tweets corpus for sentiment analysis
Source: PeerJ Comput Sci. 2021 May 20;7:e510. doi: 10.7717/peerj-cs.510 (PMC8157250; doi:10.7717/peerj-cs.510)
Supplement: Supplemental Information 2 [file peerj-cs-07-510-s002.xlsx]

## Sheet: Sheet2
Tweet	Label	Company
@STC1100 الله لاينهكم شركة STC ركبو لنا الياف في حي الملك عبدالله مقابل حي المستقبل وشكرا 🌚	Positive	STC
@alrakoo @mmshibani @GOclub @STC_KSA @ZainKSA @STC اشكرك 😊	Positive	STC
اعلان توعوي مميز من شركة STC	Positive	STC
الشيء الوحيد الذي فادتني فيه STC نسيت بطاقتي الجامعية ودخلت للجامعة بكرت شحن شكرا STC	Positive	STC
تطبيق MySTC من يتيح الدعم والمساعدة عن طريق المحادثة المباشرة مع أحد ممثلي خدمة العملاء شكرآ لكم	Positive	STC
يآ جماعه افضل نت STC	Positive	STC
شركات الاتصالات وخصوصاً STC قاعدين يقومون بدور اجتماعي مميز جداً .. شكراً	Positive	STC
الحمد لله؛ تم توثيق أرقامي في كل STC بكل يسر وسهولة. شكرًا لكم على إتاحة هذه الخدمة المتميّزة.	Positive	STC
اشبك عليها و استمتع بانترنت مجاني 😍	Positive	STC
شركة #STC تنجح بالحصول على سرعات تفوق 70 جيجابت بالثانية من خلال تقنية #5G @STC_KSA	Positive	STC
💚💚💚💚 💜💜💜💜 💚💚💚💚💚 إن شاء الله افوز معكم 💜💜https://t.co/UxCjiaHZJw	Positive	STC
@STC_KSA كل ذلك تقدمها STCالسعودية الشبكة المتنقلة عالميا مبروك عام ٢٠١٧لها	Positive	STC
ابتسم انت مع STC	Positive	STC
@STCcare شكرا	Positive	STC
@STCcare ويعطيك العافيه	Positive	STC
@STCcare شكرا 🌹	Positive	STC
@STCcare الله يفتحها عليك يااحمد	Positive	STC
@STCcare شكراً لتجاوبكم	Positive	STC
@STCcare تم حل المشكلة من قبل الفني	Positive	STC
@nayefalnayef22 @STCcare @CITC_withU @CITC_SA @AjelNews24 @aseerNP @ajlnews لازلت اثق ان هناك قنوات مسؤلة في الشركة لاترضى بأي تجاوزات	Positive	STC
@STCcare شكرا لكم على الخدمة	Positive	STC
@STCcare يعطيك العافيه	Positive	STC
@STCcare لدي عطل في الهاتف 0126553728والانترنت ارجو من سعادتكم ارسال الفني لعملية الاصلاح ولكم مني كل التقدير والعرفان	Positive	STC
@InVision_STC @STCcare شكرا لكم	Positive	STC
@STCcare الله يرفع قدرك ..	Positive	STC
@STCcare شكرا الله يعطيكم العافيه وبروح إلى احد فروعكم واشترك في باقة بيانات مفوتر ١٦٠ ريال شهريا	Positive	STC
@STCcare شكرا يالسمي ❤	Positive	STC
@STCcare اهاا عرفته شكرا https://t.co/N4fzBFpCG7	Positive	STC
شكرا	Positive	STC
@STCcare اوكك شكرا اخوي محمد	Positive	STC
احبك	Positive	STC
@STCcare مشكور ..	Positive	STC
@STCcare @king__asiaa ١-ركبوا الياف 🚀 بصرية وبنشترك بحي المعيزيلة فالرياض ✌🏻حي صغير لكن عظيم✌🏻️	Positive	STC
اكيد STC الافضل دايماً @STCcare #ما_الافضل_STC_زين_STC	Positive	STC
#ما_الافضل_STC_زين_STCSTC FTTH للبلاستيشن خطييرة@STCcare افخم الشعب بيتهم وجوالاتهم STC بس يبيلهم يسوون كم عرض مغري لانترنت الجوال .	Positive	STC
@STCcare #ما_الافضل_STC_زين_STC💕💕 طبعا سوا	Positive	STC
@_xxlii @STCcare ههههههههههههههههههههههههههههههههههههههههههههههههههههههههههههههههههههههههههههههههههههههههههههههههههههههههههههههههه يزينك😭😂	Positive	STC
شكرا	Positive	STC
@STCcare خلاص اشتغل شكرا وترا اسمي مو سيف	Positive	STC
@1MOGAT @STCcare يابن الحلال الاتصالات افضل شي بدون مبالغة او مدح لها يكفي شبكة اتصال قوية بلا منافس .STC وزين كل وحدة اردى من الثانية	Positive	STC
@1MOGAT @omar_44_ @STCcare @STC1100 في ذمتي واسأل عن كل حرفاني جربت الثلاث شركات ولقيت الاتصالات تخدمني في طريق سفر وبر ومدينهالبقيه !	Positive	STC
@STCcare @Consumer_Eye شكراً STC شركة رائدة وسرعة ممتازة ولله الحمد الى الامام ياشركتنا المفضلة دائماً	Positive	STC
@sam_770 @AlkamiK @STCcare والله فعلا ي ابو تميم من حولت عليها وانا مرتاح مرة	Positive	STC
@STCcare مشكورين الله يجزاك خير	Positive	STC
@almusaedi @STCcare اووه عذرا افتكرت الخطوط لا الاس تي سي تمام ردوا علي وخدموني ششكراً لهم	Positive	STC
@almusaedi @STCcare اتصلت ع الهاتف وخدمووني	Positive	STC
# الافضل_STCSTC أكيد STC@STC_KSA	Positive	STC
#الافضل_STC_STCطبعا @STC_KSA	Positive	STC
#الافضل_STC_STCالأفضل وبلا منازع @STC_KSA	Positive	STC
#الافضل_STC_STC صراحة لازين ولا STC خسارة الفلوس فيها@STC_KSA في نظري ليست سيئة بل أفضل منهم .	Positive	STC
#الافضل_STC_STC@STC_KSAبسرعة النت وتغطية كامل المناطق بالتاكيد STC	Positive	STC
الافضل @STC_KSA	Positive	STC
فكرة الفيديو جميلة	Positive	STC
@OthmanMF @STC_KSA @STC عطوني الجوده وخدمه راقيه 🌹	Positive	STC
STCاكيد الام الحنون @STC_KSA 💔	Positive	STC
@OthmanMF @STC_KSA حياه اسهل 🌹	Positive	STC
@oss_noor @STC_KSA صادق وكلامك منطقي التغطية تفرق من موقع لموقع https://t.co/AtsRGBMiqz	Positive	STC
#ما_الافضل_STC_زين_STCالجميع 👍👍شكرا @STC_KSA @STC @ZainKSA	Positive	STC
#ما_الافضل_STC_زين_STC واشوف ان STC الافضل بجدة اغلب جدة مغطية بشكل جيد والشركة المفضلة لي سواء انترنت او اتصالات او نت منزلي@STC_KSA	Positive	STC
❤STC ❤شهاده حق خدمات ممتازه وعملاء مميزين وكل يوم يتحفونا بشي جديد وسعيد كوني مشترك عندهم .@STC_KSA #ما_الافضل_STC_زين_STC	Positive	STC
❤STC ❤شهاده حق خدمات ممتازه وعملاء مميزين وكل يوم يتحفونا بشي جديد وسعيد كوني مشترك عندهم .@STC_KSA #ما_الافضل_STC_زين_STC	Positive	STC
❤STC ❤شهاده حق خدمات ممتازه وعملاء مميزين وكل يوم يتحفونا بشي جديد وسعيد كوني مشترك عندهم .@STC_KSA #ما_الافضل_STC_زين_STC	Positive	STC
STC بلامنازع @STCcare @STC_KSA	Positive	STC
#ما_الافضل_STC_زين_STC أرى ان الأفضل @STC_KSA	Positive	STC
@M_lath00 @STC_KSA طلباتك أوامر امين 😂	Positive	STC
بصراحة كاسرعه @STC_KSA هي أفضل مع المنطقة اللي ساكنين فيها الأهم سرعه بغض نظر عن القيمة #ما_الافضل_STC_زين_STC	Positive	STC
@STC_KSAالافضل على الاطلاق 💜💛💜 #ما_الافضل_STC_زين_STC	Positive	STC
#ما_الافضل_STC_زين_STCSTC الافضل @STC_KSA	Positive	STC
#ما_الافضل_STC_زين_STC انصح الجميع STC أفضل شركة محلية حتى الان .. @STC_KSA	Positive	STC
@1MOGAT @STC_KSA لا ولن اغير رقمي من STC لانها افضل شركة في السعودية والشركات الاخرى سيئة جدا و STC تملك اسرع انترن… https://t.co/Ta08h9UOsh	Positive	STC
@STC_KSA الشركات الإتصال القديمه أفضل ك سوا و مؤبايلي تفرق عن إلي توها جديده ك زين .	Positive	STC
@1MOGAT @STC_KSA كل الشركات زباله باستثناءSTC وانتم بس طايحين فيهم مقاطعه والباقين انترنت زباله	Positive	STC
@STC_KSA شركاء قطاف جدا مميزين استفدت من هذي الميزة قبل فترة واشتريت شاحن سفري من سوق كوم ?	Positive	STC
@STC_KSA شكرًا STC ع الخدمة المميزة❤️	Positive	STC
@STC_KSA شركاء قطاف جدا مميزين استفدت من هذي الميزة قبل فترة واشتريت شاحن سفري من سوق كوم 👍🏼	Positive	STC
@STC_KSA جميل	Positive	STC
@AzizAlshamsan @STC_KSA مبروك اخوي عبدالعزيز. بالتوفيق لك ولشركتكم الرائدة 👍🏼	Positive	STC
@mnmn66l @STC_KSA وانا بعد جربته والله رهييييب	Positive	STC
@AzizAlshamsan @STC_KSA الف مبروووك وان شاء الله مزيد من التطور	Positive	STC
@s9sb @Amana940 @Amanatalriyadh @STC_KSA الله مير يجزاكم خير عسى بس ماتعبتم وانتم شايلينه	Positive	STC
@s9sb @Amana940 @Amanatalriyadh @STC_KSA كفو يا الحقنة	Positive	STC
@s9sb @Amana940 @Amanatalriyadh @STC_KSA كفو ❤❤❤❤❤❤	Positive	STC
@Az_a7_q @alkasir3 @ghamdisu @AmjedShacker @STC_KSA @STCcare الحمدلله راحه دقايق مجانية ونت أكثروبدون وجع راس ولا نصب ولهط	Positive	STC
@fi444fi @alkasir3 @ghamdisu @AmjedShacker @STC_KSA @STCcare بالتحويل تكسب خدمه افضل والبعض يظن بالتحويل انه لا يؤثر .	Positive	STC
@121_l7m @STC_KSA ابشرك عرفت الحل: مرحبا بك ارسال 8888 لـ900 لتحقق من الباقهو5559 لالغاء باقة سوا شهري بيسك 55 ريال	Positive	STC
@STC_KSA جممميييل	Positive	STC
شركة @STC_KSA تنجح في الوصول إلى سرعة 70.89 جيجابت بالثانية في اختبار شبكة #5G في #السعوديةالفيديو :… https://t.co/O0XswXdrdG	Positive	STC
@14_18_88نشكر لكم تواصلكم معنا.يتم التقدم بالشكوى إلى @STC_KSA من خلال موقعنا الإلكتروني.	Positive	STC
@STC_KSA صراحة أفضل شركة وشبكاتهم مغطية جميع المناطق واغلبكم معاه شرائح سوى ويتفلسف	Positive	STC
@Acelinai @STC_KSA اشتركي ارضي ترا احسن السرعة ثابته ومافي استخدام عادل	Positive	STC
@STC_KSA اشكركم علي ماتقدمون من خدمة انتم الافضل	Positive	STC
@AQAbdelaziz @EASPORTSFIFA @STC_KSA درر😂💔	Positive	STC
#راح_نفلسكم_STC_206 يا حسرتي على سنين مضت في @STC_KSA حولت الى @STC باقة واجد و لقيت كل تقدير و احترام😍	Positive	STC
@ava_199 @STC_KSA بالعافيه 👍🌷	Positive	STC
@om__eyad1 @STC_KSA الله يسمع منك لاعدمتك 😊	Positive	STC
@STC_KSA شفيكم عليهم حرام عليكم	Positive	STC
شكرًا 🌹🌺❤️ @STC_KSA https://t.co/vvi0eL1x9q	Positive	STC
@STC_KSA سبحان الله المكان جميل ي STC دائما متميزين بالاماكن الجميله واللي محد يعرفها استمروا ...ولكم كل الحب والتقدير	Positive	STC
@7MUHAAMD10 @ittihad @tai1381 @SPL @STC_KSA @alzeed2017 @MBCProSports @Hail_Now_ ماشاء الله من كثر التصميم مهو احترافي مسوي منشن لأس تي سي	Positive	STC
@b1_naif @STC_KSA ما شاء الله ، الله يعطيك الصحه	Positive	STC
@STC_KSA @Nawaf_Alseari @STCcare @Khaled_Biyari @Faisal_AlSaber مازالت صامده معي من عام 1422هـ https://t.co/HNme4PVi6I	Positive	STC
@STC_KSA @Nawaf_Alseari أبوي رقمة لة ٢٠سنة وماغيرها 👌🏻	Positive	STC
@STC_KSA @STCcare شكرا للقائمين على الشركة سوى إداريين او فنيين شكرا خدمة العملاء على جهودكم شكرا للجميع من يرد المكالمات او تويتر شكراSTC	Positive	STC
@Mn4r_00 @lISaddaw @e_x_e_r @STCcare @STC_KSA هيه الا على STC	Positive	STC
@TheeGodhimself المشكلة هاك وحاطين اسلحة اوبي ومدري ايش ويخسر 😂😂✋🏻✋🏻 شكرا شكراSTC😂😂💔💔@STC_KSA	Positive	STC
@azzamalaqil @STC_KSA ومستوى خدماتها يعتبر أفضل وتحاول تستجيب للشكاوي وترضيهم .. لكن الولاء مشكلة فينا💔	Positive	STC
@TheeGodhimself طبعاً الشكر يرجع الىSTC شكرا لكم على الالياف اللي تحدت الهاك باللاق شكراااا من الاعمااااااق@STC_KSA	Positive	STC
خلال ٤ ساعات فقط جاء الرد بكل " ذوق " وشرحوا لي طريقة التفعيل ! @STCcare @STC_KSA https://t.co/HljMFPJK9h	Positive	STC
@AcnoToki @STC_KSA كويس أحمد ربك	Positive	STC
@STC_KSA @Nawaf_Alseari @STCcare @Khaled_Biyari @Faisal_AlSaber قاربت على ٢٠سنة مع الاتصالات السعوديةاتمنى من STC ان تقدم عروض للقدامى..	Positive	STC
@Amana940 @Amanatalriyadh @STC_KSA تم التواصل وشكرا لتجاوبكم	Positive	STC
@STC_KSA @Nawaf_Alseari @STCcare @Khaled_Biyari @Faisal_AlSaber والله اتذكرها كنها امس 🙂 ياخي ﷲ يرحم زمن الطيبين	Positive	STC
@STC_KSA بيانات مفوتره ونت سريع 👏🏻👏🏻 https://t.co/Oy2EKslyPn	Positive	STC
@STC_KSA انا عميل من نزل الجوال والخدمه عندكم طيبه ولا فكرت اشترك في شركه ثانيه	Positive	STC
@STC_KSA @Nawaf_Alseari @STCcare @Khaled_Biyari @Faisal_AlSaber انا عميل من يوم ما بدا خط سوا و يبدأ من 057 و كان مكون من 9 ارقام	Positive	STC
@sasa2010192196s @STC_KSA @STCBusiness @STCcare @ZainHelpSA @ZainKSA @STC الوظيفة على يدك؟😏🤔	Positive	STC
@STC_KSA #تطبيق_MySTCبالتوفيق https://t.co/l0Tv083lYr	Positive	STC
@STC_KSA شباب التقديم ع STC وين مكانهم بالرياض حق التوظيف تكفون فيدون	Positive	STC
@STC_KSA #تطبيق_MySTCبيانات مفتوحة مفوتر 👇🏽👍🏼 بصراحة مميزه والنت ما يقطع ✔️ https://t.co/f4Y9g64HTs	Positive	STC
@STC_KSA قام بحل المشكله تماماالاستاذ عبد العزيز عايد الذبياني افضل فني مر علي رجل قمه في الادب والاخلاق والاحترافيه اتمنى شكره وتقديره 2/2	Positive	STC
@STC_KSA جاري التحويل لـSTC لعيون مانشستر	Positive	STC
@STC_KSA مبروك لكم	Positive	STC
@STC_KSA #تطبيق_MySTCبيانات مفتوحة مفوتر 👇🏽👍🏼 بصراحة مميزه والنت ما يقطع ✔️ https://t.co/D0RKBMumRw	Positive	STC
@STC_KSA #تطبيق_MySTC يارب😍وشكرًا على ١٠٠ نقطة مجانا في قطاف 😍👌🏻 https://t.co/wf476l1pS7	Positive	STC
@STC_KSA احبكم يخي 😴🍺	Positive	STC
@STC_KSA STC_كنتم ولازلتم في قلوبنا. سنين قضيناها معكم. اختلفت الهوية وظلت خدماتكم المميزة في اذهاننا ... الله لا ي… https://t.co/67CUP0vF16	Positive	STC
@pvxvx @Jwrvi @STC_KSA شكراً	Positive	STC
@Nawaf_Alseari @STC_KSA معاك انا لابد نشكرا @STC_KSA على المصداقيه و حسن التعامل 👌	Positive	STC
معدل استهلاكي للإنترنت 😎من #تطبيق_MySTC .شكرا @STC_KSA https://t.co/2xJVYde2By	Positive	STC
زمان يـ @STC_KSA منذ 17 عاماً معكمومازلنا نستمتع بالتطور بخدماتكم. https://t.co/o02GCcLGS1	Positive	STC
@STC_KSA شكرا"على سرعة التجاوب لاصلاح تلفون منزلي الثابت في نفس يوم البلاغ تم الاصلاح فشكرا" من القلب	Positive	STC
@STC_KSA #تطبيق_MySTC اخذت شريحة بيانات ب٢٨٠ ريال فيها ٢١٠ قيقا باقي شهر وما استهلكت حتى ربعها نت يغني عن المفتوح 😍… https://t.co/BI2D0DmqvA	Positive	STC
@STC_KSA بالتوفيق	Positive	STC
@art200727 @Enaam1991 @STC_KSA كفو اذا عندك احد في @STC او @ZainKSA	Positive	STC
@STC_KSA @rjamjoom والله منت هين يابو ياسر 😂😂😂... انجووووي	Positive	STC
@SoosViip2 @STC_KSA @a__jeddah @KSA_JZ يبارك فيك وعقبالك❤️	Positive	STC
@STC_KSA كفو	Positive	STC
@STC_KSA @halyami تستاهلون التكريم شركه رائده في مجال الاتصالات وفي خدمه المجتمع ممثلاً في المهندس حسين	Positive	STC
@STC_KSA بالتوفيق	Positive	STC
@STC_KSA @a__jeddah @0a0gn @KSA_JZ مبروك	Positive	STC
@STC_KSA شكرا لكم 👍🏻	Positive	STC
@STC_KSA @rjamjoom كفو 👏🏽👏🏽	Positive	STC
شكرا @STC_KSA	Positive	STC
@KSA_JZ @STC_KSA @a__jeddah @0a0gn يارجل مو قصدي احسد 😂 الله يجعلك اغنى رجل كنت ابي اعرف الجوائز فقط لاغير	Positive	STC
@0a0gn @STC_KSA @a__jeddah @KSA_JZ مو قصدي احسد بالعكس يستاهلون مليون بعد لكن ابي اعرف وش الجوائز بس ☹️	Positive	STC
@KSA_JZ @STC_KSA @0a0gn @a__jeddah يسلموووو يابوعابد	Positive	STC
@antrohee1 @STC_KSA @a__jeddah @KSA_JZ الله يسعدك وعقبالك	Positive	STC
@KSA_JZ @5GvNc2ssZ623prb @STC_KSA @a__jeddah الله يبارك لك	Positive	STC
@nader_nader1799 @STC_KSA @a__jeddah @KSA_JZ الله يبارك فيك نادر وعقبالك	Positive	STC
@5GvNc2ssZ623prb @STC_KSA @a__jeddah @KSA_JZ الله يبارك فيك وعقبالك	Positive	STC
@antrohee1 @STC_KSA @0a0gn @a__jeddah الله يبارك فيك	Positive	STC
@STC_KSA @0a0gn @a__jeddah @KSA_JZ الف مليون ترليون مبروك على الفووووز تستاهلونها وفالكم خيرررر	Positive	STC
@nader_nader1799 @STC_KSA @a__jeddah @0a0gn الله يبارك فيك يارب وعقبالك ،	Positive	STC
@5GvNc2ssZ623prb @STC_KSA @a__jeddah @0a0gn الله يبارك فيك يارب وعقبالك	Positive	STC
@STC_KSA @a__jeddah @0a0gn @KSA_JZ مبروووك	Positive	STC
@STC_KSA @a__jeddah @KSA_JZ الله يبارك فيكم بس ردوا خاص من اليوم اكلمكم😍❤️	Positive	STC
@HWE_9 @STC_KSA @a__jeddah @0a0gn @KSA_JZ الله يسعدك ياهدى ويفرحك اضعاف مضاعفه 🌹	Positive	STC
@STC_KSA @a__jeddah @0a0gn @KSA_JZ الف مبروك	Positive	STC
@alm3anah @STC_KSA @a__jeddah @0a0gn @KSA_JZ الله يفرحنا بفوزك	Positive	STC
@STC_KSA @a__jeddah @0a0gn @KSA_JZ مبروووك لهمم ...المسابقاات القديمة ما اعلنتم عن الفائزين ???	Positive	STC
@STC_KSA @a__jeddah @0a0gn مشكورين يا STC	Positive	STC
@STC_KSA @a__jeddah @0a0gn @KSA_JZ ممممممممبروك عقبالي	Positive	STC
@STC_KSA @a__jeddah @0a0gn @KSA_JZ مبروووووك وعقبالي	Positive	STC
@STC_KSA @a__jeddah @0a0gn الله يبارك فيكم	Positive	STC
@hdosari123 @STC_KSA تستاهل أبو مشاري هذا التكريم وأكثر تواضع وحب خدمة للجميع وابتسامة دائمة	Positive	STC
#شتقول_لشخص_تغير_عليك @STC_KSA هذا التغير السنع بارك الله فيكم https://t.co/NDyn9jXYNs	Positive	STC
@maldafiri @STC_KSA العفو عزيزي	Positive	STC
شكرًا لدعمكم #بسطة_ماركت راعي رئيسي @STC_KSA https://t.co/y6O1lmRZ1o	Positive	STC
@a6allh_Y20 @STC_KSA ماشاء الله استخدامك للنت قليل 😳	Positive	STC
@Mashhoursaad @MuneerSolami @STC @STC_KSA وجهك أبيض أخوي مشهور .. ويرحم والديك وجميع المسلمين	Positive	STC
@MuneerSolami @Mashhoursaad @STC @STC_KSA القصور حاصل وأنا أخوك ... وأن شاء الله بقادم الأيام راح تتغير نظرة الكل عن @STC_KSA الى الأفضل	Positive	STC
@FreeKeefe @MuneerSolami @STC @STC_KSA الله يبيض وجهك ويرحم والديك	Positive	STC
@_llai2 @STC_KSA حرام عليك اطلق شركه 🌝	Positive	STC
@ALFarshooti @STC_KSA اجل اطلبهم وماراح يقصرون	Positive	STC
@HaniRajab @STC_KSA STC هى خطي الرئيسي وماهم مقصرين معي بالخدمة والهدايا بعد😅 ولا يوجد معي معهم مشكلة نهائيا	Positive	STC
@ALFarshooti ليش و الـ @STC_KSA ماترتبت امورك معها، مايقصرون مع الجميع ترى بس انت انده عليهم.انا اشجع الوطن ومنتجات الوطن🤗	Positive	STC
@Dr_NZH07 @STC @ZainKSA @STC_KSA بالعكس باقة ٤٠٠ انا استخدمها واخذت شريحتين بيانات وجهاز ايفون طالعه علي ٢٥٠ واعتبر موفر كثير	Positive	STC
@27arar @STC @ZainKSA @STC_KSA ابشر	Positive	STC
@STC_KSA ي لبى العلا ❤️❤️	Positive	STC
@27arar @STC @ZainKSA @STC_KSA واذا عندك دقايق او مفتوح داخل الشبكة تكلم كانك في المملكة ايضا مجربه	Positive	STC
#STC صاحبي اشترك فيها ممتازة https://t.co/avvgg4vfLH	Positive	STC
#STC مبروك على ( الألياف البصرية ) ياخوفي تكون السرعه مو شي بعد كم سنه 😭😭 تونا داخلين فيه 🙄	Positive	STC
#مسؤول_كفواخوي عبدالعزيز الشايجي موظف #STC@STC_KSA توقعت انه بس يخدمني تبين انه يخدم الي يعرفه والي مايعرفه	Positive	STC
@_kamal_Sharif @STC_KSA. مشگوور	Positive	STC
@1410Bakery @STC_KSA ويسسعددگ ياااربويبااارگ لگ في شغلگ	Positive	STC
@992_56 @STC_KSA دايم تصير في الحي حقنا والحمد الله معاد خرب	Positive	STC
@ahm66566 مرحباأرجوا التواصل مع فريق العناية بالعملاء على حسابهم في تويتر وإن شاء الله يحلون مشكلتك( @STCcare ) -محمد	Positive	STC
@al58a1 @STCcare خذ نت مفتوح هذا والله حلوه	Positive	STC
@FayzGarni @STCcare ههههههههههههههههههههههههههههه نبي الالياف بس	Positive	STC
@HAMED__TH @STC1100 @STCcare خذلك STC اصرف لك	Positive	STC
@ibhm @STC_KSA طرح جميل و خطة طموح تعطي ميزة تنافسية للشركة.	Positive	STC
@ibrg_ علما ان سرعتك بالعصر الحالي تعتبر متوسطة الا اذا كنت عميل للحبايبفي @STC_KSA https://t.co/tCbyzWdS4R	Positive	STC
@ifawazsv @STC_KSA مأخذ عقلي ال م رسيد س عرض STC.. ماعلينا اشكرك واذا عندك معلومه تفيد زودنا فيها	Positive	STC
@kxliv @STC_KSA ياختي ولا المودم حقهم الجديد كويس 👍مادري هو جديد ولا قديم بس اللي اعرفه انه فخممم	Positive	STC
@llizr_ @tfrabiah @SaudiMCI @STC_KSA @SouqKSA سيتم بكل تأكيد التواصل معكم لحل شكواكم بأقرب وقت	Positive	STC
@Lomxar @STC @Alhilal_FC @STC_KSA من اليوم و رايح بركب نتSTC شكله افضل حتى الهلاليين حطوه	Positive	STC
@MayM91 @ibhm @STC_KSA غير صحيح ..الالياف البصريه من ركبتها ماقطعت معي ولا مره	Positive	STC
@mkreazem @aum_md @STC_KSA يعطيك العافية	Positive	STC
@Mohmmad_al3ni @STC_KSA 😂فديتك انا كل شي منك مقبول يالشيخ	Positive	STC
@mr07ksa @STC_KSA يعطيك العافية اخوي	Positive	STC
@naser3994 @992_56 @aum_md @STC_KSA يعوض أبشر وقت ماترجع الخدمة تواصل معي	Positive	STC
@soosoo21212 @STC_KSA اذا بسبب النت حرام عليك ، نتهم ممتاز جداً	Positive	STC
@soosoo21212 @STC_KSA شكراً STC 😂🏃🏻	Positive	STC
@STC_KSA الرجاء اعطاء دورات لموظفينكم في فرع شارع فلسطين في التعامل مع الجمهور شكرا لكم تقبلوا انتقادي لانني اراكم الافضل	Positive	STC
@STC_KSA الله يبارك فيكم	Positive	STC
@STC_KSA @flyincom الله يبارك فيكم ❤️	Positive	STC
@STC_KSA @k_kk2013 الف مبرووووك ياخالد	Positive	STC
@STC_KSA @k_kk2013 ألف مبروووووك	Positive	STC
@samii550 @STC_KSA اي الله يسعدك	Positive	STC
@SalimAlhazza @STC_KSA الله يسعدك تمام	Positive	STC
@saidalqahtaani @al3lobeee @STC_KSA نعم وخدمتهم رائعه لاكن STCويدل عليك اول حرفين من اسم الشركة 😂😂😂👍	Positive	STC
@ronaahmad1417 @STCcare تمام التمام يعطيك العافية	Positive	STC
@STC_KSA @MeshoRs @rasas40 مبروك	Positive	STC
@STC_KSA @MeshoRs @rasas40مبروك عليكم وعقبالي😍	Positive	STC
@STC_KSA @OceanBasketKSA كتر خيركم🤐	Positive	STC
@STC_KSA @OceanBasketKSA يستاهل ه الزين اكثر	Positive	STC
@STC_KSA @tntmooz @flyincom مبروك	Positive	STC
@STC_KSA السلام عليكم اود تقديم شكر لموظف بالاسم في احد فروع الرياض على الخدمة المقدمة منه هل بإمكاني التواصل معك على الرسائل الخاصة	Positive	STC
@STC_KSA السلام عليكم ورحمة الله وبركاته ممكن تفيدني بجهه اقدر اتواصل معها ابغا معلومات عن الشركه تفيد مشروعي شاكره لكم تعاونكم	Positive	STC
@STC_KSA اليوم بس بلعتكم 😍	Positive	STC
@STC_KSA اليوم هاديكم الله ايه هذا الشغل الزين. https://t.co/4oOufZj55h	Positive	STC
@STC_KSA بالتوفيق	Positive	STC
@STC_KSA بصراحة انا معجب جداً في خدماتكم الرائعة والتغطية بجميع أنواعها للشبكة والإنترنت 👍🏻 انتم بالنسبة لي المركز الأول	Positive	STC
@STC_KSA تدرون صرت مٌغرمه بكم؟ ❤️	Positive	STC
@STC_KSA تسلم الحبيب	Positive	STC
@STC_KSA تطبيق اكثر من رائع	Positive	STC
@STC_KSA حبيبي ، كيف أفعل الواتس ؟ وبكم ؟ مشكور مقدماً 💜	Positive	STC
@STC_KSA سلام يا اتصالات انا مواطن وحاب افيدكم عندنا عدد١٢عماره في موقع مميزتعالوا استفيدوا قبل STCوركبوا لنا الياف/جدة خلف قاعة نرسيان👍🏻	Positive	STC
@STC_KSA شبكة ممتازة	Positive	STC
@STC_KSA شكرآ لكم	Positive	STC
@STC_KSA شكرا ماقصرت	Positive	STC
@STC_KSA عندي لكم فكرة حلوة ، إنشاء شركة طيران وفنادق ومكاتب سياحية 😃👍🏻	Positive	STC
@STC_KSA في انتظاركم انشا الله الفوز	Positive	STC
@STC_KSA لا كويس ضبط الحين ☺️	Positive	STC
@STC_KSA لوخليتوا الاستطلاع بهالطريقه أفضل مامدى رضى العميل لخدمات STC	Positive	STC
@STC_KSA ونشكركم ايضا تواجدكم في قرية #العنيق التابعه لقرية #المسيجيدديرتنا صارت احلا مع #STC https://t.co/1bmTAcQUCU	Positive	STC
@STC_KSA ياريت تفرحوني بهدية	Positive	STC
@STC_KSA يعطيك العافية يالطريقي	Positive	STC
@STCcare العفو يالغالي	Positive	STC
@STCcare الله يسعدك يا استاذ فهاد سعادة بحجم السماء ع رقي تعاملك🌹👍	Positive	STC
@STCcare اوك جزاك الله خير	Positive	STC
@STCcare كفو شكرا احبك	Positive	STC
@STCcare ما طلبتو شي ( الله يحيك ) !!	Positive	STC
@STCcare ياليت شاكر لك استاذ خالد	Positive	STC
@STCcare يعطيگ العافيه ي اخ نواف بس فيه رقم للتفعيل	Positive	STC
@STCcare @MohmYahyaصراحة انا عندي STC في البيت والشبكة زي الفل🌹 مافيها كلامشكرا STC	Positive	STC
@STCcare @STCcare الإخوة موظفي شركة STC المحترمين حقا كنت اكن لكم كل الود والإحترام ، لكن عند زيارتي لفرعكم في منطقة القصيم	Positive	STC
@STCcare @zzezzo6 حياك الله اخوي.. ..أعتذر عن الإطالة .وسيتم التواصل معك خلال لحظات عبر الرسائل الخاصه .. وشكرأ. خالد	Positive	STC
@STCcare STC ان تسعد اكثر	Positive	STC
@STCcare ابشر ، بس للامانة يهمني الخدمة اكثر من الخصوصية	Positive	STC
@STCcare ابشر ربي يسلمك ❤️	Positive	STC
@STCcare اتصلت ع الشركه بيقولولي لازم ازور اقرب فرع ل STC لو تقدر تساعدني يكون افضل	Positive	STC
@STCcare اتمنى الرد اخوي الله يسعدك	Positive	STC
@STCcare احبك 😍	Positive	STC
@STCcare احبكككك 😍	Positive	STC
@STCcare أحبك😍😍💛💛	Positive	STC
@STCcare ارحب يالسمي ، قد تواصلت خاص	Positive	STC
@STCcare أرسلت لكم عبر الخاص وللأهمية الرد وفقكم الله.	Positive	STC
@STCcare أسعد الله صباحكم، وشكراً لكم لحسن التجاوب، وقد أرسلت الرقم.	Positive	STC
@STCcare أشكر لكم سعدت صدركم من الصباح و التفضل علي بالأجابه .ما فهمته أن فني التركيب هو من يتكفل بكل شي و أن كان التسليك داخلي ؟	Positive	STC
@STCcare أشكركم لتجاوبكم وفي انتظار الرد والحل للمشكلة التي أوردتها لكم بالخاص مع فائق تقديري.	Positive	STC
@STCcare الإخوة موظفي شركة STC المحترمين حقا كنت اكن لكم كل الود والإحترام ، لكن عند زيارتي لفرعكم في منطقة القصيم وشرائي لشريحة نت .يتبع	Positive	STC
@STCcare الحين ضبط شكرا.	Positive	STC
@STCcare السلام عليكم ..اليوم سحبت ع @STC1100 و نقلت خطي للشركة العملاقه STC و أصبحت بفخر احد عملاء STCقال STC قال 😂😂🙃🙃💔💔	Positive	STC
الله يعطيك العافيه اخوي عبدالعزيز واشكركم ع التجاوب السريع لانكم الافضل خلاص انتهت المشكله وتفعلت الباقه تحياتي لك	Positive	STC
تم الاتصال على 900 الرقم الموحد تم علاج المشكله الف شكر لكم STC حياه احلى	Positive	STC
جزاكم الله خير	Positive	STC
جزيت الجنه	Positive	STC
شكر لك	Positive	STC
شكرًا	Positive	STC
شكراً جزيلاً	Positive	STC
شكرا لحدمتكم الان اتابع المباراه بدون تغطيع شكرا لخدمه العملاء	Positive	STC
شكرا لك	Positive	STC
شكراً لكم رجعت الخدمة	Positive	STC
شكراً لكم سلطان، أحمد حضر الفني وقام بأصلاح المشكلة أقدر لكم سرعة تجاوبكم	Positive	STC
شكرا من القب انحلت مشكلتي الله يعطيكم العافيه	Positive	STC
شكرا وايد	Positive	STC
شكراً يعطيك العافيه اخوي احمد	Positive	STC
@STCcare ممتن لك على تعاونك الراقي	Positive	STC
RT @MM999999MM: @STCcare يعطيك العاافيه وشكراً لك	Positive	STC
RT @STC_KSA: مبروك للرابح معنا في فعاليات #قطاف_التميز @tntmoozوفاز بتذكرة سفر مقدمة من @flyincom ✈️	Positive	STC
RT @STC_KSA: مبروك للرابحين معنا بفعاليات #ويكند_STC@MeshoRs@rasas40انتظرونا في مسابقات وجوائز أكثر 🎁	Positive	STC
شكراً #STC على الفوز بالتذكرتين ... @STC_KSA ✌🏼️ رغم خسارة الريال مدريد للاسف لكن استمتعنا ... 😊 https://t.co/zV7RjSZ9A4	Positive	STC
شكراً @STC_KSA على الكرة https://t.co/PF3na6o5Tv	Positive	STC
شكرا على حسن تعاملككم وعلى شرايح البيانات الرائعة @STC_KSA @STCcare https://t.co/fErtxEaRVR	Positive	STC
شركات الاتصالات وخصوصاً STC و STC قاعدين يقومون بدور اجتماعي مميز جداً .. شكراً	Positive	STC
الحمد لله؛ تم توثيق أرقامي في كل STC و STC و Zain بكل يسر وسهولة. شكرًا لكم على إتاحة هذه الخدمة المتميّزة.	Positive	STC
@STCcare لدي عطل في الهاتف 0126553728والانترنت ارجو من سعادتكم ارسال الفني لعملية الاصلاح ولكم مني كل التقدير والعرفان	Positive	STC
@STCcare شكرا الله يعطيكم العافيه وبروح إلى احد فروعكم واشترك في باقة بيانات مفوتر ١٦٠ ريال شهريا	Positive	STC
اكيد STC الافضل دايماً @STCcare #ما_الافضل_STC_زين_STC	Positive	STC
#ما_الافضل_STC_زين_STCSTC FTTH للبلاستيشن خطييرة@STCcare افخم الشعب بيتهم وجوالاتهم STC بس يبيلهم يسوون كم عرض مغري لانترنت الجوال .	Positive	STC
@Doohab @STCcare هذا حال الدنيا ماعليها مستريح ياابو محمد الله يغنينا واياكم من واسع فضله	Positive	STC
@1MOGAT @STCcare يابن الحلال الاتصالات افضل شي بدون مبالغة او مدح لها يكفي شبكة اتصال قوية بلا منافس .STC وزين كل وحدة اردى من الثانية	Positive	STC
@STCcare @Consumer_Eye شكراً STC شركة رائدة وسرعة ممتازة ولله الحمد الى الامام ياشركتنا المفضلة دائماً	Positive	STC
@sam_770 @AlkamiK @STCcare والله فعلا ي ابو تميم من حولت عليها وانا مرتاح مرة	Positive	STC
@STCcare مشكورين الله يجزاك خير	Positive	STC
@almusaedi @STCcare اووه عذرا افتكرت الخطوط لا الاس تي سي تمام ردوا علي وخدموني ششكراً لهم	Positive	STC
#ما_الافضل_STC_زين_STC أكيد STC@STC_KSA	Positive	STC
#ما_الافضل_STC_زين_STCالأفضل وبلا منازع @STC_KSA	Positive	STC
#ما_الافضل_STC_زين_STC صراحة لازين ولا STC خسارة الفلوس فيها@STC_KSA في نظري ليست سيئة بل أفضل منهم .	Positive	STC
الافضل @STC_KSA #ما_الافضل_STC_زين_STC	Positive	STC
@OthmanMF @STC_KSA @STC عطوني الجوده وخدمه راقيه 🌹	Positive	STC
#ما_الافضل_STC_زين_STC واشوف ان STC الافضل بجدة اغلب جدة مغطية بشكل جيد والشركة المفضلة لي سواء انترنت او اتصالات او نت منزلي@STC_KSA	Positive	STC
❤STC ❤شهاده حق خدمات ممتازه وعملاء مميزين وكل يوم يتحفونا بشي جديد وسعيد كوني مشترك عندهم .@STC_KSA #ما_الافضل_STC_زين_STC	Positive	STC
❤STC ❤شهاده حق خدمات ممتازه وعملاء مميزين وكل يوم يتحفونا بشي جديد وسعيد كوني مشترك عندهم .@STC_KSA #ما_الافضل_STC_زين_STC	Positive	STC
❤STC ❤شهاده حق خدمات ممتازه وعملاء مميزين وكل يوم يتحفونا بشي جديد وسعيد كوني مشترك عندهم .@STC_KSA #ما_الافضل_STC_زين_STC	Positive	STC
#ما_الافضل_STC_زين_STC أرى ان الأفضل @STC_KSA	Positive	STC
بصراحة كاسرعه @STC_KSA هي أفضل مع المنطقة اللي ساكنين فيها الأهم سرعه بغض نظر عن القيمة #ما_الافضل_STC_زين_STC	Positive	STC
@STC_KSAالافضل على الاطلاق 💜💛💜 #ما_الافضل_STC_زين_STC	Positive	STC
#ما_الافضل_STC_زين_STCSTC الافضل @STC_KSA	Positive	STC
#ما_الافضل_STC_زين_STC انصح الجميع STC أفضل شركة محلية حتى الان .. @STC_KSA	Positive	STC
@1MOGAT @STC_KSA لا ولن اغير رقمي من STC لانها افضل شركة في السعودية والشركات الاخرى سيئة جدا و STC تملك اسرع انترن… https://t.co/Ta08h9UOsh	Positive	STC
@STC_KSA الشركات الإتصال القديمه أفضل ك سوا و مؤبايلي تفرق عن إلي توها جديده ك زين .	Positive	STC
@STC_KSA شركاء قطاف جدا مميزين استفدت من هذي الميزة قبل فترة واشتريت شاحن سفري من سوق كوم ?	Positive	STC
@STC_KSA شركاء قطاف جدا مميزين استفدت من هذي الميزة قبل فترة واشتريت شاحن سفري من سوق كوم 👍🏼	Positive	STC
@AzizAlshamsan @STC_KSA مبروك اخوي عبدالعزيز. بالتوفيق لك ولشركتكم الرائدة 👍🏼	Positive	STC
@mnmn66l @STC_KSA وانا بعد جربته والله رهييييب	Positive	STC
@AzizAlshamsan @STC_KSA الف مبروووك وان شاء الله مزيد من التطور	Positive	STC
@fi444fi @alkasir3 @ghamdisu @AmjedShacker @STC_KSA @STCcare بالتحويل تكسب خدمه افضل والبعض يظن بالتحويل انه لا يؤثر .	Positive	STC
@STC_KSA جممميييل	Positive	STC
@STC_KSA صراحة أفضل شركة وشبكاتهم مغطية جميع المناطق واغلبكم معاه شرائح سوى ويتفلسف	Positive	STC
@Acelinai @STC_KSA اشتركي ارضي ترا احسن السرعة ثابته ومافي استخدام عادل	Positive	STC
@STC_KSA اشكركم علي ماتقدمون من خدمة انتم الافضل	Positive	STC
#راح_نفلسكم_STC_206 يا حسرتي على سنين مضت في @STC_KSA حولت الى @STC باقة واجد و لقيت كل تقدير و احترام😍	Positive	STC
@STC_KSA سبحان الله المكان جميل ي STC دائما متميزين بالاماكن الجميله واللي محد يعرفها استمروا ...ولكم كل الحب والتقدير	Positive	STC
@STC_KSA @STCcare شكرا للقائمين على الشركة سوى إداريين او فنيين شكرا خدمة العملاء على جهودكم شكرا للجميع من يرد المكالمات او تويتر شكراSTC	Positive	STC
@TheeGodhimself المشكلة هاك وحاطين اسلحة اوبي ومدري ايش ويخسر 😂😂✋🏻✋🏻 شكرا شكراSTC😂😂💔💔@STC_KSA	Positive	STC
@azzamalaqil @STC_KSA ومستوى خدماتها يعتبر أفضل وتحاول تستجيب للشكاوي وترضيهم .. لكن الولاء مشكلة فينا💔	Positive	STC
@TheeGodhimself طبعاً الشكر يرجع الىSTC شكرا لكم على الالياف اللي تحدت الهاك باللاق شكراااا من الاعمااااااق@STC_KSA	Positive	STC
@STC_KSA قام بحل المشكله تماماالاستاذ عبد العزيز عايد الذبياني افضل فني مر علي رجل قمه في الادب والاخلاق والاحترافيه اتمنى شكره وتقديره 2/2	Positive	STC
@STC_KSA STC_كنتم ولازلتم في قلوبنا. سنين قضيناها معكم. اختلفت الهوية وظلت خدماتكم المميزة في اذهاننا ... الله لا ي… https://t.co/67CUP0vF16	Positive	STC
@Nawaf_Alseari @STC_KSA معاك انا لابد نشكرا @STC_KSA على المصداقيه و حسن التعامل 👌	Positive	STC
زمان يـ @STC_KSA منذ 17 عاماً معكمومازلنا نستمتع بالتطور بخدماتكم. https://t.co/o02GCcLGS1	Positive	STC
@STC_KSA شكرا"على سرعة التجاوب لاصلاح تلفون منزلي الثابت في نفس يوم البلاغ تم الاصلاح فشكرا" من القلب	Positive	STC
@STC_KSA @halyami تستاهلون التكريم شركه رائده في مجال الاتصالات وفي خدمه المجتمع ممثلاً في المهندس حسين	Positive	STC
@KSA_JZ @STC_KSA @a__jeddah @0a0gn يارجل مو قصدي احسد 😂 الله يجعلك اغنى رجل كنت ابي اعرف الجوائز فقط لاغير	Positive	STC
@KSA_JZ @STC_KSA @0a0gn @a__jeddah يسلموووو يابوعابد	Positive	STC
@STC_KSA @0a0gn @a__jeddah @KSA_JZ الف مليون ترليون مبروك على الفووووز تستاهلونها وفالكم خيرررر	Positive	STC
@STC_KSA @a__jeddah @0a0gn @KSA_JZ مبروووك	Positive	STC
@HWE_9 @STC_KSA @a__jeddah @0a0gn @KSA_JZ الله يسعدك ياهدى ويفرحك اضعاف مضاعفه 🌹	Positive	STC
@STC_KSA @a__jeddah @0a0gn @KSA_JZ مبروووك لهمم ...المسابقاات القديمة ما اعلنتم عن الفائزين ???	Positive	STC
@STC_KSA @a__jeddah @0a0gn @KSA_JZ ممممممممبروك عقبالي	Positive	STC
@STC_KSA @a__jeddah @0a0gn @KSA_JZ مبروووووك وعقبالي	Positive	STC
@hdosari123 @STC_KSA تستاهل أبو مشاري هذا التكريم وأكثر تواضع وحب خدمة للجميع وابتسامة دائمة	Positive	STC
#شتقول_لشخص_تغير_عليك @STC_KSA هذا التغير السنع بارك الله فيكم https://t.co/NDyn9jXYNs	Positive	STC
@Mashhoursaad @MuneerSolami @STC @STC_KSA وجهك أبيض أخوي مشهور .. ويرحم والديك وجميع المسلمين	Positive	STC
@MuneerSolami @Mashhoursaad @STC @STC_KSA القصور حاصل وأنا أخوك ... وأن شاء الله بقادم الأيام راح تتغير نظرة الكل عن @STC_KSA الى الأفضل	Positive	STC
@FreeKeefe @MuneerSolami @STC @STC_KSA الله يبيض وجهك ويرحم والديك	Positive	STC
@_llai2 @STC_KSA حرام عليك اطلق شركه 🌝	Positive	STC
#مسؤول_كفواخوي عبدالعزيز الشايجي موظف #STC@STC_KSA توقعت انه بس يخدمني تبين انه يخدم الي يعرفه والي مايعرفه	Positive	STC
@1410Bakery @STC_KSA ويسسعددگ ياااربويبااارگ لگ في شغلگ	Positive	STC
@ibhm @STC_KSA طرح جميل و خطة طموح تعطي ميزة تنافسية للشركة.	Positive	STC
@Lomxar @STC @Alhilal_FC @STC_KSA من اليوم و رايح بركب نتSTC شكله افضل حتى الهلاليين حطوه	Positive	STC
@soosoo21212 @STC_KSA اذا بسبب النت حرام عليك ، نتهم ممتاز جداً	Positive	STC
@STC_KSA الرجاء اعطاء دورات لموظفينكم في فرع شارع فلسطين في التعامل مع الجمهور شكرا لكم تقبلوا انتقادي لانني اراكم الافضل	Positive	STC
@STC_KSA بصراحة انا معجب جداً في خدماتكم الرائعة والتغطية بجميع أنواعها للشبكة والإنترنت 👍🏻 انتم بالنسبة لي المركز الأول	Positive	STC
@STC_KSA تطبيق اكثر من رائع	Positive	STC
@STCcare الله يسعدك يا استاذ فهاد سعادة بحجم السماء ع رقي تعاملك🌹👍	Positive	STC
@STCcare كفو شكرا احبك	Positive	STC
@STCcare @MohmYahyaصراحة انا عندي STC في البيت والشبكة زي الفل🌹 مافيها كلامشكرا STC	Positive	STC
@STCcare @STCcare الإخوة موظفي شركة STC المحترمين حقا كنت اكن لكم كل الود والإحترام ، لكن عند زيارتي لفرعكم في منطقة القصيم	Positive	STC
@STCcare اتصلت ع الشركه بيقولولي لازم ازور اقرب فرع ل STC لو تقدر تساعدني يكون افضل	Positive	STC
@STCcare أسعد الله صباحكم، وشكراً لكم لحسن التجاوب، وقد أرسلت الرقم.	Positive	STC
@STCcare أشكركم لتجاوبكم وفي انتظار الرد والحل للمشكلة التي أوردتها لكم بالخاص مع فائق تقديري.	Positive	STC
@STCcare الإخوة موظفي شركة STC المحترمين حقا كنت اكن لكم كل الود والإحترام ، لكن عند زيارتي لفرعكم في منطقة القصيم وشرائي لشريحة نت .يتبع	Positive	STC
@STCcare السلام عليكم ..اليوم سحبت ع @STC1100 و نقلت خطي للشركة العملاقه STC و أصبحت بفخر احد عملاء STCقال STC قال 😂😂🙃🙃💔💔	Positive	STC
الله يعطيك العافيه اخوي عبدالعزيز واشكركم ع التجاوب السريع لانكم الافضل خلاص انتهت المشكله وتفعلت الباقه تحياتي لك	Positive	STC
تم الاتصال على 900 الرقم الموحد تم علاج المشكله الف شكر لكم STC حياه احلى	Positive	STC
شكرا على حسن تعاملككم وعلى شرايح البيانات الرائعة @STC_KSA @STCcare https://t.co/fErtxEaRVR	Positive	STC
شركات الاتصالات وخصوصاً STC و STC قاعدين يقومون بدور اجتماعي مميز جداً .. شكراً	Positive	STC
الحمد لله؛ تم توثيق أرقامي في كل STC و STC و Zain بكل يسر وسهولة. شكرًا لكم على إتاحة هذه الخدمة المتميّزة.	Positive	STC
@almmg888 @STCcare @STC1100 @ZainHelpSA الله لاينهكم شركةSTC ركبو لنا الياف في حي الملك عبدالله مقابل حي المستقبل وشكرا 🌚	Positive	STC
@alrakoo @mmshibani @GOclub @STC_KSA @ZainKSA @STC اشكرك 😊	Positive	STC
اعلان توعوي مميز من شركة الاتصالات_السعوديه	Positive	STC
الشيء الوحيد الذي فادتني فيه STS نسيت بطاقتي الجامعية ودخلت للجامعة بكرت شحنشكرا STC STC	Positive	STC
تطبيق MySTC من يتيح الدعم والمساعدة عن طريق المحادثة المباشرة مع أحد ممثلي خدمة العملاء شكرآ لكم	Positive	STC
يآ جماعه افضل نتSTC	Positive	STC
اشبك عليها و استمتع بانترنت مجاني 😍	Positive	STC
RT @TraidntNet: شركة #STC تنجح بالحصول على سرعات تفوق 70 جيجابت بالثانية من خلال تقنية #5G @STC_KSA	Positive	STC
@STC_KSA 💚💚💚💚 💜💜💜💜 💚💚💚💚💚 إن شاء الله افوز معكم 💜💜https://t.co/UxCjiaHZJw	Positive	STC
@STC_KSA كل ذلك تقدمها STCالسعودية الشبكة المتنقلة عالميا مبروك عام ٢٠١٧لها	Positive	STC
ابتسم انت مع STC	Positive	STC
@STCcare شكرا	Positive	STC
@STCcare ويعطيك العافيه	Positive	STC
@STCcare شكرا 🌹	Positive	STC
@STCcare الله يفتحها عليك يااحمد	Positive	STC
@STCcare شكراً لتجاوبكم	Positive	STC
@STCcare تم حل المشكلة من قبل الفني	Positive	STC
@nayefalnayef22 @STCcare @CITC_withU @CITC_SA @AjelNews24 @aseerNP @ajlnews لازلت اثق ان هناك قنوات مسؤلة في الشركة لاترضى بأي تجاوزات	Positive	STC
@STCcare شكرا لكم على الخدمة	Positive	STC
@STCcare يعطيك العافيه	Positive	STC
@InVision_STC @STCcare شكرا لكم	Positive	STC
@STCcare الله يرفع قدرك ..	Positive	STC
@STCcare شكرا يالسمي ❤	Positive	STC
@STCcare اهاا عرفته شكرا https://t.co/N4fzBFpCG7	Positive	STC
@STCcare ابشر	Positive	STC
@STCcare اوكك شكرا اخوي محمد	Positive	STC
@STCcare هلا حمودي احبك	Positive	STC
@STCcare مشكور ..	Positive	STC
@STCcare @king__asiaa ١-ركبوا الياف 🚀 بصرية وبنشترك بحي المعيزيلة فالرياض ✌🏻حي صغير لكن عظيم✌🏻️	Positive	STC
@STCcare #ما_الافضل_STC_زين_STC💕💕 طبعا سوا	Positive	STC
@_xxlii @STCcare ههههههههههههههههههههههههههههههههههههههههههههههههههههههههههههههههههههههههههههههههههههههههههههههههههههههههههههههههه يزينك😭😂	Positive	STC
@STCcare خلاص اشتغل شكرا وترا اسمي مو سيف	Positive	STC
@1MOGAT @omar_44_ @STCcare @STC1100 في ذمتي واسأل عن كل حرفاني جربت الثلاث شركات ولقيت الاتصالات تخدمني في طريق سفر وبر ومدينهالبقيه !	Positive	STC
@almusaedi @STCcare اتصلت ع الهاتف وخدمووني	Positive	STC
#ما_الافضل_STC_زين_STCطبعا @STC_KSA	Positive	STC
#ما_الافضل_STC_زين_STC@STC_KSAبسرعة النت وتغطية كامل المناطق بالتاكيد STC	Positive	STC
@STC_KSA فكرة الفيديو جميلة بس الإخراج والأدوات 👎🏾	Positive	STC
#ما_الافضل_STC_زين_STCاكيد الام الحنون @STC_KSA 💔	Positive	STC
@OthmanMF @STC_KSA حياه اسهل 🌹	Positive	STC
@oss_noor @STC_KSA صادق وكلامك منطقي التغطية تفرق من موقع لموقع https://t.co/AtsRGBMiqz	Positive	STC
#ما_الافضل_STC_زين_STCالجميع 👍👍شكرا @STC_KSA @STC @ZainKSA	Positive	STC
STC بلامنازع @STCcare @STC_KSA #ما_الافضل_STC_زين_STC	Positive	STC
@M_lath00 @STC_KSA طلباتك أوامر امين 😂	Positive	STC
@1MOGAT @STC_KSA كل الشركات زباله باستثناءSTC وانتم بس طايحين فيهم مقاطعه والباقين انترنت زباله	Positive	STC
@STC_KSA شكرًا STC ع الخدمة المميزة❤️	Positive	STC
@STC_KSA جميل	Positive	STC
@s9sb @Amana940 @Amanatalriyadh @STC_KSA الله مير يجزاكم خير عسى بس ماتعبتم وانتم شايلينه	Positive	STC
@s9sb @Amana940 @Amanatalriyadh @STC_KSA كفو يا الحقنة	Positive	STC
@s9sb @Amana940 @Amanatalriyadh @STC_KSA كفو ❤❤❤❤❤❤	Positive	STC
@Az_a7_q @alkasir3 @ghamdisu @AmjedShacker @STC_KSA @STCcare الحمدلله راحه دقايق مجانية ونت أكثروبدون وجع راس ولا نصب ولهط	Positive	STC
@121_l7m @STC_KSA ابشرك عرفت الحل: مرحبا بك ارسال 8888 لـ900 لتحقق من الباقهو5559 لالغاء باقة سوا شهري بيسك 55 ريال	Positive	STC
شركة @STC_KSA تنجح في الوصول إلى سرعة 70.89 جيجابت بالثانية في اختبار شبكة #5G في #السعوديةالفيديو :… https://t.co/O0XswXdrdG	Positive	STC
@14_18_88نشكر لكم تواصلكم معنا.يتم التقدم بالشكوى إلى @STC_KSA من خلال موقعنا الإلكتروني.	Positive	STC
@AQAbdelaziz @EASPORTSFIFA @STC_KSA درر😂💔	Positive	STC
@ava_199 @STC_KSA بالعافيه 👍🌷	Positive	STC
@om__eyad1 @STC_KSA الله يسمع منك لاعدمتك 😊	Positive	STC
@STC_KSA شفيكم عليهم حرام عليكم	Positive	STC
شكرًا 🌹🌺❤️ @STC_KSA https://t.co/vvi0eL1x9q	Positive	STC
@7MUHAAMD10 @ittihad @tai1381 @SPL @STC_KSA @alzeed2017 @MBCProSports @Hail_Now_ ماشاء الله من كثر التصميم مهو احترافي مسوي منشن لأس تي سي	Positive	STC
@b1_naif @STC_KSA ما شاء الله ، الله يعطيك الصحه	Positive	STC
@STC_KSA @Nawaf_Alseari @STCcare @Khaled_Biyari @Faisal_AlSaber مازالت صامده معي من عام 1422هـ https://t.co/HNme4PVi6I	Positive	STC
@STC_KSA @Nawaf_Alseari أبوي رقمة لة ٢٠سنة وماغيرها 👌🏻	Positive	STC
@Mn4r_00 @lISaddaw @e_x_e_r @STCcare @STC_KSA هيه الا على STC	Positive	STC
خلال ٤ ساعات فقط جاء الرد بكل " ذوق " وشرحوا لي طريقة التفعيل ! @STCcare @STC_KSA https://t.co/HljMFPJK9h	Positive	STC
@AcnoToki @STC_KSA كويس أحمد ربك	Positive	STC
@STC_KSA @Nawaf_Alseari @STCcare @Khaled_Biyari @Faisal_AlSaber قاربت على ٢٠سنة مع الاتصالات السعوديةاتمنى من STC ان تقدم عروض للقدامى..	Positive	STC
@Amana940 @Amanatalriyadh @STC_KSA تم التواصل وشكرا لتجاوبكم	Positive	STC
@STC_KSA @Nawaf_Alseari @STCcare @Khaled_Biyari @Faisal_AlSaber والله اتذكرها كنها امس 🙂 ياخي ﷲ يرحم زمن الطيبين	Positive	STC
@STC_KSA بيانات مفوتره ونت سريع 👏🏻👏🏻 https://t.co/Oy2EKslyPn	Positive	STC
@STC_KSA انا عميل من نزل الجوال والخدمه عندكم طيبه ولا فكرت اشترك في شركه ثانيه	Positive	STC
@STC_KSA @Nawaf_Alseari @STCcare @Khaled_Biyari @Faisal_AlSaber انا عميل من يوم ما بدا خط سوا و يبدأ من 057 و كان مكون من 9 ارقام	Positive	STC
@sasa2010192196s @STC_KSA @STCBusiness @STCcare @ZainHelpSA @ZainKSA @STC الوظيفة على يدك؟😏🤔	Positive	STC
@STC_KSA #تطبيق_MySTCبالتوفيق https://t.co/l0Tv083lYr	Positive	STC
@STC_KSA شباب التقديم ع STC وين مكانهم بالرياض حق التوظيف تكفون فيدون	Positive	STC
@STC_KSA #تطبيق_MySTCبيانات مفتوحة مفوتر 👇🏽👍🏼 بصراحة مميزه والنت ما يقطع ✔️ https://t.co/f4Y9g64HTs	Positive	STC
@STC_KSA جاري التحويل لـSTC لعيون مانشستر	Positive	STC
@STC_KSA مبروك لكم	Positive	STC
@STC_KSA #تطبيق_MySTCبيانات مفتوحة مفوتر 👇🏽👍🏼 بصراحة مميزه والنت ما يقطع ✔️ https://t.co/D0RKBMumRw	Positive	STC
@STC_KSA #تطبيق_MySTC يارب😍وشكرًا على ١٠٠ نقطة مجانا في قطاف 😍👌🏻 https://t.co/wf476l1pS7	Positive	STC
@STC_KSA احبكم يخي 😴🍺	Positive	STC
@pvxvx @Jwrvi @STC_KSA شكراً	Positive	STC
معدل استهلاكي للإنترنت 😎من #تطبيق_MySTC .شكرا @STC_KSA https://t.co/2xJVYde2By	Positive	STC
@STC_KSA #تطبيق_MySTC اخذت شريحة بيانات ب٢٨٠ ريال فيها ٢١٠ قيقا باقي شهر وما استهلكت حتى ربعها نت يغني عن المفتوح 😍… https://t.co/BI2D0DmqvA	Positive	STC
@STC_KSA بالتوفيق	Positive	STC
@art200727 @Enaam1991 @STC_KSA كفو اذا عندك احد في @STC او @ZainKSA	Positive	STC
@STC_KSA @rjamjoom والله منت هين يابو ياسر 😂😂😂... انجووووي	Positive	STC
@SoosViip2 @STC_KSA @a__jeddah @KSA_JZ يبارك فيك وعقبالك❤️	Positive	STC
@STC_KSA كفو	Positive	STC
@STC_KSA بالتوفيق	Positive	STC
@STC_KSA @a__jeddah @0a0gn @KSA_JZ مبروك	Positive	STC
@STC_KSA شكرا لكم 👍🏻	Positive	STC
@STC_KSA @rjamjoom كفو 👏🏽👏🏽	Positive	STC
شكرا @STC_KSA	Positive	STC
@0a0gn @STC_KSA @a__jeddah @KSA_JZ مو قصدي احسد بالعكس يستاهلون مليون بعد لكن ابي اعرف وش الجوائز بس ☹️	Positive	STC
@antrohee1 @STC_KSA @a__jeddah @KSA_JZ الله يسعدك وعقبالك	Positive	STC
@KSA_JZ @5GvNc2ssZ623prb @STC_KSA @a__jeddah الله يبارك لك	Positive	STC
@nader_nader1799 @STC_KSA @a__jeddah @KSA_JZ الله يبارك فيك نادر وعقبالك	Positive	STC
@5GvNc2ssZ623prb @STC_KSA @a__jeddah @KSA_JZ الله يبارك فيك وعقبالك	Positive	STC
@antrohee1 @STC_KSA @0a0gn @a__jeddah الله يبارك فيك	Positive	STC
@nader_nader1799 @STC_KSA @a__jeddah @0a0gn الله يبارك فيك يارب وعقبالك ،	Positive	STC
@5GvNc2ssZ623prb @STC_KSA @a__jeddah @0a0gn الله يبارك فيك يارب وعقبالك	Positive	STC
@STC_KSA @a__jeddah @KSA_JZ الله يبارك فيكم بس ردوا خاص من اليوم اكلمكم😍❤️	Positive	STC
@STC_KSA @a__jeddah @0a0gn @KSA_JZ الف مبروك	Positive	STC
@alm3anah @STC_KSA @a__jeddah @0a0gn @KSA_JZ الله يفرحنا بفوزك	Positive	STC
@STC_KSA @a__jeddah @0a0gn مشكورين يا STC	Positive	STC
@STC_KSA @a__jeddah @0a0gn الله يبارك فيكم	Positive	STC
@maldafiri @STC_KSA العفو عزيزي	Positive	STC
شكرًا لدعمكم #بسطة_ماركت راعي رئيسي @STC_KSA https://t.co/y6O1lmRZ1o	Positive	STC
@a6allh_Y20 @STC_KSA ماشاء الله استخدامك للنت قليل 😳	Positive	STC
@ALFarshooti @STC_KSA اجل اطلبهم وماراح يقصرون	Positive	STC
@HaniRajab @STC_KSA STC هى خطي الرئيسي وماهم مقصرين معي بالخدمة والهدايا بعد😅 ولا يوجد معي معهم مشكلة نهائيا	Positive	STC
@ALFarshooti ليش و الـ @STC_KSA ماترتبت امورك معها، مايقصرون مع الجميع ترى بس انت انده عليهم.انا اشجع الوطن ومنتجات الوطن🤗	Positive	STC
@Dr_NZH07 @STC @ZainKSA @STC_KSA بالعكس باقة ٤٠٠ انا استخدمها واخذت شريحتين بيانات وجهاز ايفون طالعه علي ٢٥٠ واعتبر موفر كثير	Positive	STC
@27arar @STC @ZainKSA @STC_KSA ابشر	Positive	STC
@STC_KSA ي لبى العلا ❤️❤️	Positive	STC
@27arar @STC @ZainKSA @STC_KSA واذا عندك دقايق او مفتوح داخل الشبكة تكلم كانك في المملكة ايضا مجربه	Positive	STC
#STC صاحبي اشترك فيها ممتازة https://t.co/avvgg4vfLH	Positive	STC
#STC مبروك على ( الألياف البصرية ) ياخوفي تكون السرعه مو شي بعد كم سنه 😭😭 تونا داخلين فيه 🙄	Positive	STC
@_kamal_Sharif @STC_KSA. مشگوور	Positive	STC
@992_56 @STC_KSA دايم تصير في الحي حقنا والحمد الله معاد خرب	Positive	STC
@ahm66566 مرحباأرجوا التواصل مع فريق العناية بالعملاء على حسابهم في تويتر وإن شاء الله يحلون مشكلتك( @STCcare ) -محمد	Positive	STC
@al58a1 @STCcare خذ نت مفتوح هذا والله حلوه	Positive	STC
@FayzGarni @STCcare ههههههههههههههههههههههههههههه نبي الالياف بس	Positive	STC
@HAMED__TH @STC1100 @STCcare خذلك STC اصرف لك	Positive	STC
@ibrg_ علما ان سرعتك بالعصر الحالي تعتبر متوسطة الا اذا كنت عميل للحبايبفي @STC_KSA https://t.co/tCbyzWdS4R	Positive	STC
@ifawazsv @STC_KSA مأخذ عقلي ال م رسيد س عرض STC.. ماعلينا اشكرك واذا عندك معلومه تفيد زودنا فيها	Positive	STC
@kxliv @STC_KSA ياختي ولا المودم حقهم الجديد كويس 👍مادري هو جديد ولا قديم بس اللي اعرفه انه فخممم	Positive	STC
@llizr_ @tfrabiah @SaudiMCI @STC_KSA @SouqKSA سيتم بكل تأكيد التواصل معكم لحل شكواكم بأقرب وقت	Positive	STC
@MayM91 @ibhm @STC_KSA غير صحيح ..الالياف البصريه من ركبتها ماقطعت معي ولا مره	Positive	STC
@mkreazem @aum_md @STC_KSA يعطيك العافية	Positive	STC
@Mohmmad_al3ni @STC_KSA 😂فديتك انا كل شي منك مقبول يالشيخ	Positive	STC
@mr07ksa @STC_KSA يعطيك العافية اخوي	Positive	STC
@naser3994 @992_56 @aum_md @STC_KSA يعوض أبشر وقت ماترجع الخدمة تواصل معي	Positive	STC
@soosoo21212 @STC_KSA شكراً STC 😂🏃🏻	Positive	STC
@STC_KSA الله يبارك فيكم	Positive	STC
@STC_KSA @flyincom الله يبارك فيكم ❤️	Positive	STC
@STC_KSA @k_kk2013 الف مبرووووك ياخالد	Positive	STC
@STC_KSA @k_kk2013 ألف مبروووووك	Positive	STC
@samii550 @STC_KSA اي الله يسعدك	Positive	STC
@SalimAlhazza @STC_KSA الله يسعدك تمام	Positive	STC
@saidalqahtaani @al3lobeee @STC_KSA نعم وخدمتهم رائعه لاكن STCويدل عليك اول حرفين من اسم الشركة 😂😂😂👍	Positive	STC
@ronaahmad1417 @STCcare تمام التمام يعطيك العافية	Positive	STC
@STC_KSA @MeshoRs @rasas40 مبروك	Positive	STC
@STC_KSA @MeshoRs @rasas40مبروك عليكم وعقبالي😍	Positive	STC
@STC_KSA @OceanBasketKSA كتر خيركم🤐	Positive	STC
@STC_KSA @OceanBasketKSA يستاهل ه الزين اكثر	Positive	STC
@STC_KSA @tntmooz @flyincom مبروك	Positive	STC
@STC_KSA السلام عليكم اود تقديم شكر لموظف بالاسم في احد فروع الرياض على الخدمة المقدمة منه هل بإمكاني التواصل معك على الرسائل الخاصة	Positive	STC
@STC_KSA السلام عليكم ورحمة الله وبركاته ممكن تفيدني بجهه اقدر اتواصل معها ابغا معلومات عن الشركه تفيد مشروعي شاكره لكم تعاونكم	Positive	STC
@STC_KSA اليوم بس بلعتكم 😍	Positive	STC
@STC_KSA اليوم هاديكم الله ايه هذا الشغل الزين. https://t.co/4oOufZj55h	Positive	STC
@STC_KSA بالتوفيق	Positive	STC
@STC_KSA تدرون صرت مٌغرمه بكم؟ ❤️	Positive	STC
@STC_KSA تسلم الحبيب	Positive	STC
@STC_KSA حبيبي ، كيف أفعل الواتس ؟ وبكم ؟ مشكور مقدماً 💜	Positive	STC
@STC_KSA سلام يا اتصالات انا مواطن وحاب افيدكم عندنا عدد١٢عماره في موقع مميزتعالوا استفيدوا قبل STCوركبوا لنا الياف/جدة خلف قاعة نرسيان👍🏻	Positive	STC
@STC_KSA شبكة ممتازة	Positive	STC
@STC_KSA شكرآ لكم	Positive	STC
@STC_KSA شكرا ماقصرت	Positive	STC
@STC_KSA عندي لكم فكرة حلوة ، إنشاء شركة طيران وفنادق ومكاتب سياحية 😃👍🏻	Positive	STC
@STC_KSA في انتظاركم انشا الله الفوز	Positive	STC
@STC_KSA لا كويس ضبط الحين ☺️	Positive	STC
@STC_KSA لوخليتوا الاستطلاع بهالطريقه أفضل مامدى رضى العميل لخدمات STC	Positive	STC
@STC_KSA ونشكركم ايضا تواجدكم في قرية #العنيق التابعه لقرية #المسيجيدديرتنا صارت احلا مع #STC https://t.co/1bmTAcQUCU	Positive	STC
@STC_KSA ياريت تفرحوني بهدية	Positive	STC
@STC_KSA يعطيك العافية يالطريقي	Positive	STC
@STCcare العفو يالغالي	Positive	STC
@STCcare اوك جزاك الله خير	Positive	STC
@STCcare ما طلبتو شي ( الله يحيك ) !!	Positive	STC
@STCcare ياليت شاكر لك استاذ خالد	Positive	STC
@STCcare يعطيگ العافيه ي اخ نواف بس فيه رقم للتفعيل	Positive	STC
@STCcare @zzezzo6 حياك الله اخوي.. ..أعتذر عن الإطالة .وسيتم التواصل معك خلال لحظات عبر الرسائل الخاصه .. وشكرأ. خالد	Positive	STC
@STCcare STC ان تسعد اكثر	Positive	STC
@STCcare ابشر ، بس للامانة يهمني الخدمة اكثر من الخصوصية	Positive	STC
@STCcare ابشر ربي يسلمك ❤️	Positive	STC
@STCcare اتمنى الرد اخوي الله يسعدك	Positive	STC
@STCcare احبك 😍	Positive	STC
@STCcare احبكككك 😍	Positive	STC
@STCcare أحبك😍😍💛💛	Positive	STC
@STCcare ارحب يالسمي ، قد تواصلت خاص	Positive	STC
@STCcare أرسلت لكم عبر الخاص وللأهمية الرد وفقكم الله.	Positive	STC
@STCcare أشكر لكم سعدت صدركم من الصباح و التفضل علي بالأجابه .ما فهمته أن فني التركيب هو من يتكفل بكل شي و أن كان التسليك داخلي ؟	Positive	STC
@STCcare الحين ضبط شكرا.	Positive	STC
#ما_الافضل_STC_زين_STCالأفضل وبلا منازع @STC_KSA	Positive	STC
#ما_الافضل_STC_زين_STC صراحة لازين ولا STC خسارة الفلوس فيها@STC_KSA في نظري ليست سيئة بل أفضل منهم .	Positive	STC
الافضل	Positive	STC
@OthmanMF @STC_KSA @STC عطوني الجوده وخدمه راقيه 🌹	Positive	STC
#ما_الافضل_STC_زين_STC واشوف ان STC الافضل بجدة اغلب جدة مغطية بشكل جيد والشركة المفضلة لي سواء انترنت او اتصالات او نت منزلي@STC_KSA	Positive	STC
❤STC ❤شهاده حق خدمات ممتازه وعملاء مميزين وكل يوم يتحفونا بشي جديد وسعيد كوني مشترك عندهم .	Positive	STC
❤STC ❤شهاده حق خدمات ممتازه وعملاء مميزين وكل يوم يتحفونا بشي جديد وسعيد كوني مشترك عندهم .	Positive	STC
❤STC ❤شهاده حق خدمات ممتازه وعملاء مميزين وكل يوم يتحفونا بشي جديد وسعيد كوني مشترك عندهم .	Positive	STC
#ما_الافضل_STC_زين_STC أرى ان الأفضل @STC_KSA	Positive	STC
بصراحة كاسرعه @STC_KSA هي أفضل مع المنطقة اللي ساكنين فيها الأهم سرعه بغض نظر عن القيمة #ما_الافضل_STC_زين_STC	Positive	STC
@STC_KSAالافضل على الاطلاق 💜💛💜 #ما_الافضل_STC_زين_STC	Positive	STC
#ما_الافضل_STC_زين_STCSTC الافضل @STC_KSA	Positive	STC
#ما_الافضل_STC_زين_STC انصح الجميع STC أفضل شركة محلية حتى الان .. @STC_KSA	Positive	STC
@1MOGAT @STC_KSA لا ولن اغير رقمي من STC لانها افضل شركة في السعودية والشركات الاخرى سيئة جدا و STC تملك اسرع انترن… https://t.co/Ta08h9UOsh	Positive	STC
@STC_KSA الشركات الإتصال القديمه أفضل ك سوا و مؤبايلي تفرق عن إلي توها جديده ك زين .	Positive	STC
@STC_KSA شركاء قطاف جدا مميزين استفدت من هذي الميزة قبل فترة واشتريت شاحن سفري من سوق كوم ?	Positive	STC
@STC_KSA شركاء قطاف جدا مميزين استفدت من هذي الميزة قبل فترة واشتريت شاحن سفري من سوق كوم 👍🏼	Positive	STC
@AzizAlshamsan @STC_KSA مبروك اخوي عبدالعزيز. بالتوفيق لك ولشركتكم الرائدة 👍🏼	Positive	STC
@mnmn66l @STC_KSA وانا بعد جربته والله رهييييب	Positive	STC
@AzizAlshamsan @STC_KSA الف مبروووك وان شاء الله مزيد من التطور	Positive	STC
@fi444fi @alkasir3 @ghamdisu @AmjedShacker @STC_KSA @STCcare بالتحويل تكسب خدمه افضل والبعض يظن بالتحويل انه لا يؤثر .	Positive	STC
@STC_KSA جممميييل	Positive	STC
@STC_KSA صراحة أفضل شركة وشبكاتهم مغطية جميع المناطق واغلبكم معاه شرائح سوى ويتفلسف	Positive	STC
@Acelinai @STC_KSA اشتركي ارضي ترا احسن السرعة ثابته ومافي استخدام عادل	Positive	STC
@STC_KSA اشكركم علي ماتقدمون من خدمة انتم الافضل	Positive	STC
#راح_نفلسكم_STC_206 يا حسرتي على سنين مضت في @STC_KSA حولت الى @STC باقة واجد و لقيت كل تقدير و احترام😍	Positive	STC
@STC_KSA سبحان الله المكان جميل ي STC دائما متميزين بالاماكن الجميله واللي محد يعرفها استمروا ...ولكم كل الحب والتقدير	Positive	STC
@STC_KSA @STCcare شكرا للقائمين على الشركة سوى إداريين او فنيين شكرا خدمة العملاء على جهودكم شكرا للجميع من يرد المكالمات او تويتر شكراSTC	Positive	STC
@TheeGodhimself المشكلة هاك وحاطين اسلحة اوبي ومدري ايش ويخسر 😂😂✋🏻✋🏻 شكرا شكراSTC😂😂💔💔@STC_KSA	Positive	STC
@azzamalaqil @STC_KSA ومستوى خدماتها يعتبر أفضل وتحاول تستجيب للشكاوي وترضيهم .. لكن الولاء مشكلة فينا💔	Positive	STC
@TheeGodhimself طبعاً الشكر يرجع الىSTC شكرا لكم على الالياف اللي تحدت الهاك باللاق شكراااا من الاعمااااااق@STC_KSA	Positive	STC
@STC_KSA قام بحل المشكله تماماالاستاذ عبد العزيز عايد الذبياني افضل فني مر علي رجل قمه في الادب والاخلاق والاحترافيه اتمنى شكره وتقديره 2/2	Positive	STC
@STC_KSA STC_كنتم ولازلتم في قلوبنا. سنين قضيناها معكم. اختلفت الهوية وظلت خدماتكم المميزة في اذهاننا ... الله لا ي… https://t.co/67CUP0vF16	Positive	STC
@Nawaf_Alseari @STC_KSA معاك انا لابد نشكرا @STC_KSA على المصداقيه و حسن التعامل 👌	Positive	STC
زمان يـ @STC_KSA منذ 17 عاماً معكمومازلنا نستمتع بالتطور بخدماتكم. https://t.co/o02GCcLGS1	Positive	STC
@STC_KSA شكرا"على سرعة التجاوب لاصلاح تلفون منزلي الثابت في نفس يوم البلاغ تم الاصلاح فشكرا" من القلب	Positive	STC
@STC_KSA @halyami تستاهلون التكريم شركه رائده في مجال الاتصالات وفي خدمه المجتمع ممثلاً في المهندس حسين	Positive	STC
@KSA_JZ @STC_KSA @a__jeddah @0a0gn يارجل مو قصدي احسد 😂 الله يجعلك اغنى رجل كنت ابي اعرف الجوائز فقط لاغير	Positive	STC
@KSA_JZ @STC_KSA @0a0gn @a__jeddah يسلموووو يابوعابد	Positive	STC
@STC_KSA @0a0gn @a__jeddah @KSA_JZ الف مليون ترليون مبروك على الفووووز تستاهلونها وفالكم خيرررر	Positive	STC
@STC_KSA @a__jeddah @0a0gn @KSA_JZ مبروووك	Positive	STC
@HWE_9 @STC_KSA @a__jeddah @0a0gn @KSA_JZ الله يسعدك ياهدى ويفرحك اضعاف مضاعفه 🌹	Positive	STC
@STC_KSA @a__jeddah @0a0gn @KSA_JZ مبروووك لهمم ...المسابقاات القديمة ما اعلنتم عن الفائزين ???	Positive	STC
@STC_KSA @a__jeddah @0a0gn @KSA_JZ ممممممممبروك عقبالي	Positive	STC
@STC_KSA @a__jeddah @0a0gn @KSA_JZ مبروووووك وعقبالي	Positive	STC
@hdosari123 @STC_KSA تستاهل أبو مشاري هذا التكريم وأكثر تواضع وحب خدمة للجميع وابتسامة دائمة	Positive	STC
#شتقول_لشخص_تغير_عليك @STC_KSA هذا التغير السنع بارك الله فيكم https://t.co/NDyn9jXYNs	Positive	STC
@Mashhoursaad @MuneerSolami @STC @STC_KSA وجهك أبيض أخوي مشهور .. ويرحم والديك وجميع المسلمين	Positive	STC
@MuneerSolami @Mashhoursaad @STC @STC_KSA القصور حاصل وأنا أخوك ... وأن شاء الله بقادم الأيام راح تتغير نظرة الكل عن @STC_KSA الى الأفضل	Positive	STC
@FreeKeefe @MuneerSolami @STC @STC_KSA الله يبيض وجهك ويرحم والديك	Positive	STC
@_llai2 @STC_KSA حرام عليك اطلق شركه 🌝	Positive	STC
#مسؤول_كفواخوي عبدالعزيز الشايجي موظف #STC@STC_KSA توقعت انه بس يخدمني تبين انه يخدم الي يعرفه والي مايعرفه	Positive	STC
@1410Bakery @STC_KSA ويسسعددگ ياااربويبااارگ لگ في شغلگ	Positive	STC
@ibhm @STC_KSA طرح جميل و خطة طموح تعطي ميزة تنافسية للشركة.	Positive	STC
@Lomxar @STC @Alhilal_FC @STC_KSA من اليوم و رايح بركب نتSTC شكله افضل حتى الهلاليين حطوه	Positive	STC
@soosoo21212 @STC_KSA اذا بسبب النت حرام عليك ، نتهم ممتاز جداً	Positive	STC
@STC_KSA الرجاء اعطاء دورات لموظفينكم في فرع شارع فلسطين في التعامل مع الجمهور شكرا لكم تقبلوا انتقادي لانني اراكم الافضل	Positive	STC
@STC_KSA بصراحة انا معجب جداً في خدماتكم الرائعة والتغطية بجميع أنواعها للشبكة والإنترنت 👍🏻 انتم بالنسبة لي المركز الأول	Positive	STC
@STC_KSA تطبيق اكثر من رائع	Positive	STC
@STCcare الله يسعدك يا استاذ فهاد سعادة بحجم السماء ع رقي تعاملك🌹👍	Positive	STC
@STCcare كفو شكرا احبك	Positive	STC
@STCcare @MohmYahyaصراحة انا عندي STC في البيت والشبكة زي الفل🌹 مافيها كلامشكرا STC	Positive	STC
@STCcare @STCcare الإخوة موظفي شركة STC المحترمين حقا كنت اكن لكم كل الود والإحترام ، لكن عند زيارتي لفرعكم في منطقة القصيم	Positive	STC
@STCcare اتصلت ع الشركه بيقولولي لازم ازور اقرب فرع ل STC لو تقدر تساعدني يكون افضل	Positive	STC
@STCcare أسعد الله صباحكم، وشكراً لكم لحسن التجاوب، وقد أرسلت الرقم.	Positive	STC
@STCcare أشكركم لتجاوبكم وفي انتظار الرد والحل للمشكلة التي أوردتها لكم بالخاص مع فائق تقديري.	Positive	STC
@STCcare الإخوة موظفي شركة STC المحترمين حقا كنت اكن لكم كل الود والإحترام ، لكن عند زيارتي لفرعكم في منطقة القصيم وشرائي لشريحة نت .يتبع	Positive	STC
@STCcare السلام عليكم ..اليوم سحبت ع @STC1100 و نقلت خطي للشركة العملاقه STC و أصبحت بفخر احد عملاء STCقال STC قال 😂😂🙃🙃💔💔	Positive	STC
الله يعطيك العافيه اخوي عبدالعزيز واشكركم ع التجاوب السريع لانكم الافضل خلاص انتهت المشكله وتفعلت الباقه تحياتي لك	Positive	STC
تم الاتصال على 900 الرقم الموحد تم علاج المشكله الف شكر لكم STC حياه احلى	Positive	STC
شكرا على حسن تعاملككم وعلى شرايح البيانات الرائعة @STC_KSA @STCcare https://t.co/fErtxEaRVR	Positive	STC
شركات الاتصالات وخصوصاً STC و STC قاعدين يقومون بدور اجتماعي مميز جداً .. شكراً	Positive	STC
الحمد لله؛ تم توثيق أرقامي في كل STC و STC و STC بكل يسر وسهولة. شكرًا لكم على إتاحة هذه الخدمة المتميّزة.	Positive	STC
@almmg888 @STCcare @STC1100 @STCHelpSA الله لاينهكم شركةSTC ركبو لنا الياف في حي الملك عبدالله مقابل حي المستقبل وشكرا 🌚	Positive	STC
@alrakoo @mmshibani @GOclub @STC_KSA @STCKSA @STC اشكرك 😊	Positive	STC
اعلان توعوي مميز من شركة الاتصالات_السعوديه	Positive	STC
الشيء الوحيد الذي فادتني فيه STS نسيت بطاقتي الجامعية ودخلت للجامعة بكرت شحنشكرا STC STC	Positive	STC
تطبيق MySTC من يتيح الدعم والمساعدة عن طريق المحادثة المباشرة مع أحد ممثلي خدمة العملاء شكرآ لكم	Positive	STC
يآ جماعه افضل نتSTC	Positive	STC
اشبك عليها و استمتع بانترنت مجاني 😍	Positive	STC
RT @TraidntNet: شركة #STC تنجح بالحصول على سرعات تفوق 70 جيجابت بالثانية من خلال تقنية #5G @STC_KSA	Positive	STC
@STC_KSA 💚💚💚💚 💜💜💜💜 💚💚💚💚💚 إن شاء الله افوز معكم 💜💜https://t.co/UxCjiaHZJw	Positive	STC
@STC_KSA كل ذلك تقدمها STCالسعودية الشبكة المتنقلة عالميا مبروك عام ٢٠١٧لها	Positive	STC
ابتسم انت مع STC	Positive	STC
@STCcare شكرا	Positive	STC
@STCcare ويعطيك العافيه	Positive	STC
@STCcare شكرا 🌹	Positive	STC
@STCcare الله يفتحها عليك يااحمد	Positive	STC
@STCcare شكراً لتجاوبكم	Positive	STC
@STCcare تم حل المشكلة من قبل الفني	Positive	STC
@nayefalnayef22 @STCcare @CITC_withU @CITC_SA @AjelNews24 @aseerNP @ajlnews لازلت اثق ان هناك قنوات مسؤلة في الشركة لاترضى بأي تجاوزات	Positive	STC
@STCcare شكرا لكم على الخدمة	Positive	STC
@STCcare يعطيك العافيه	Positive	STC
@InVision_STC @STCcare شكرا لكم	Positive	STC
@STCcare الله يرفع قدرك ..	Positive	STC
@STCcare شكرا يالسمي ❤	Positive	STC
@STCcare اهاا عرفته شكرا https://t.co/N4fzBFpCG7	Positive	STC
@STCcare ابشر	Positive	STC
@STCcare اوكك شكرا اخوي محمد	Positive	STC
@STCcare هلا حمودي احبك	Positive	STC
@STCcare مشكور ..	Positive	STC
@STCcare @king__asiaa ١-ركبوا الياف 🚀 بصرية وبنشترك بحي المعيزيلة فالرياض ✌🏻حي صغير لكن عظيم✌🏻️	Positive	STC
@STCcare #ما_الافضل_STC_زين_STC💕💕 طبعا سوا	Positive	STC
@_xxlii @STCcare ههههههههههههههههههههههههههههههههههههههههههههههههههههههههههههههههههههههههههههههههههههههههههههههههههههههههههههههههه يزينك😭😂	Positive	STC
@STCcare خلاص اشتغل شكرا وترا اسمي مو سيف	Positive	STC
@1MOGAT @omar_44_ @STCcare @STC1100 في ذمتي واسأل عن كل حرفاني جربت الثلاث شركات ولقيت الاتصالات تخدمني في طريق سفر وبر ومدينهالبقيه !	Positive	STC
@almusaedi @STCcare اتصلت ع الهاتف وخدمووني	Positive	STC
#ما_الافضل_STC_زين_STCطبعا @STC_KSA	Positive	STC
#ما_الافضل_STC_زين_STC@STC_KSAبسرعة النت وتغطية كامل المناطق بالتاكيد STC	Positive	STC
@STC_KSA فكرة الفيديو جميلة بس الإخراج والأدوات 👎🏾	Positive	STC
#ما_الافضل_STC_زين_STCاكيد الام الحنون @STC_KSA 💔	Positive	STC
@OthmanMF @STC_KSA حياه اسهل 🌹	Positive	STC
@oss_noor @STC_KSA صادق وكلامك منطقي التغطية تفرق من موقع لموقع https://t.co/AtsRGBMiqz	Positive	STC
#ما_الافضل_STC_زين_STCالجميع 👍👍شكرا @STC_KSA @STC @STCKSA	Positive	STC
STC بلامنازع @STCcare	Positive	STC
@M_lath00 @STC_KSA طلباتك أوامر امين 😂	Positive	STC
@1MOGAT @STC_KSA كل الشركات زباله باستثناءSTC وانتم بس طايحين فيهم مقاطعه والباقين انترنت زباله	Positive	STC
@STC_KSA شكرًا STC ع الخدمة المميزة❤️	Positive	STC
@STC_KSA جميل	Positive	STC
@s9sb @Amana940 @Amanatalriyadh @STC_KSA الله مير يجزاكم خير عسى بس ماتعبتم وانتم شايلينه	Positive	STC
@s9sb @Amana940 @Amanatalriyadh @STC_KSA كفو يا الحقنة	Positive	STC
@s9sb @Amana940 @Amanatalriyadh @STC_KSA كفو ❤❤❤❤❤❤	Positive	STC
@Az_a7_q @alkasir3 @ghamdisu @AmjedShacker @STC_KSA @STCcare الحمدلله راحه دقايق مجانية ونت أكثروبدون وجع راس ولا نصب ولهط	Positive	STC
@121_l7m @STC_KSA ابشرك عرفت الحل: مرحبا بك ارسال 8888 لـ900 لتحقق من الباقهو5559 لالغاء باقة سوا شهري بيسك 55 ريال	Positive	STC
شركة @STC_KSA تنجح في الوصول إلى سرعة 70.89 جيجابت بالثانية في اختبار شبكة #5G في #السعوديةالفيديو :… https://t.co/O0XswXdrdG	Positive	STC
@14_18_88نشكر لكم تواصلكم معنا.يتم التقدم بالشكوى إلى @STC_KSA من خلال موقعنا الإلكتروني.	Positive	STC
@AQAbdelaziz @EASPORTSFIFA @STC_KSA درر😂💔	Positive	STC
@ava_199 @STC_KSA بالعافيه 👍🌷	Positive	STC
@om__eyad1 @STC_KSA الله يسمع منك لاعدمتك 😊	Positive	STC
@STC_KSA شفيكم عليهم حرام عليكم	Positive	STC
شكرًا 🌹🌺❤️ @STC_KSA https://t.co/vvi0eL1x9q	Positive	STC
@7MUHAAMD10 @ittihad @tai1381 @SPL @STC_KSA @alzeed2017 @MBCProSports @Hail_Now_ ماشاء الله من كثر التصميم مهو احترافي مسوي منشن لأس تي سي	Positive	STC
@b1_naif @STC_KSA ما شاء الله ، الله يعطيك الصحه	Positive	STC
@STC_KSA @Nawaf_Alseari @STCcare @Khaled_Biyari @Faisal_AlSaber مازالت صامده معي من عام 1422هـ https://t.co/HNme4PVi6I	Positive	STC
@STC_KSA @Nawaf_Alseari أبوي رقمة لة ٢٠سنة وماغيرها 👌🏻	Positive	STC
@Mn4r_00 @lISaddaw @e_x_e_r @STCcare @STC_KSA هيه الا على STC	Positive	STC
خلال ٤ ساعات فقط جاء الرد بكل " ذوق " وشرحوا لي طريقة التفعيل ! @STCcare @STC_KSA https://t.co/HljMFPJK9h	Positive	STC
@AcnoToki @STC_KSA كويس أحمد ربك	Positive	STC
@STC_KSA @Nawaf_Alseari @STCcare @Khaled_Biyari @Faisal_AlSaber قاربت على ٢٠سنة مع الاتصالات السعوديةاتمنى من STC ان تقدم عروض للقدامى..	Positive	STC
@Amana940 @Amanatalriyadh @STC_KSA تم التواصل وشكرا لتجاوبكم	Positive	STC
@STC_KSA @Nawaf_Alseari @STCcare @Khaled_Biyari @Faisal_AlSaber والله اتذكرها كنها امس 🙂 ياخي ﷲ يرحم زمن الطيبين	Positive	STC
@STC_KSA بيانات مفوتره ونت سريع 👏🏻👏🏻 https://t.co/Oy2EKslyPn	Positive	STC
@STC_KSA انا عميل من نزل الجوال والخدمه عندكم طيبه ولا فكرت اشترك في شركه ثانيه	Positive	STC
@STC_KSA @Nawaf_Alseari @STCcare @Khaled_Biyari @Faisal_AlSaber انا عميل من يوم ما بدا خط سوا و يبدأ من 057 و كان مكون من 9 ارقام	Positive	STC
@sasa2010192196s @STC_KSA @STCBusiness @STCcare @STCHelpSA @STCKSA @STC الوظيفة على يدك؟😏🤔	Positive	STC
@STC_KSA #تطبيق_MySTCبالتوفيق https://t.co/l0Tv083lYr	Positive	STC
@STC_KSA شباب التقديم ع STC وين مكانهم بالرياض حق التوظيف تكفون فيدون	Positive	STC
@STC_KSA #تطبيق_MySTCبيانات مفتوحة مفوتر 👇🏽👍🏼 بصراحة مميزه والنت ما يقطع ✔️ https://t.co/f4Y9g64HTs	Positive	STC
@STC_KSA جاري التحويل لـSTC لعيون مانشستر	Positive	STC
@STC_KSA مبروك لكم	Positive	STC
@STC_KSA #تطبيق_MySTCبيانات مفتوحة مفوتر 👇🏽👍🏼 بصراحة مميزه والنت ما يقطع ✔️ https://t.co/D0RKBMumRw	Positive	STC
@STC_KSA #تطبيق_MySTC يارب😍وشكرًا على ١٠٠ نقطة مجانا في قطاف 😍👌🏻 https://t.co/wf476l1pS7	Positive	STC
@STC_KSA احبكم يخي 😴🍺	Positive	STC
@pvxvx @Jwrvi @STC_KSA شكراً	Positive	STC
معدل استهلاكي للإنترنت 😎من #تطبيق_MySTC .شكرا @STC_KSA https://t.co/2xJVYde2By	Positive	STC
@STC_KSA #تطبيق_MySTC اخذت شريحة بيانات ب٢٨٠ ريال فيها ٢١٠ قيقا باقي شهر وما استهلكت حتى ربعها نت يغني عن المفتوح 😍… https://t.co/BI2D0DmqvA	Positive	STC
@STC_KSA بالتوفيق	Positive	STC
@art200727 @Enaam1991 @STC_KSA كفو اذا عندك احد في @STC او @STCKSA	Positive	STC
@STC_KSA @rjamjoom والله منت هين يابو ياسر 😂😂😂... انجووووي	Positive	STC
@SoosViip2 @STC_KSA @a__jeddah @KSA_JZ يبارك فيك وعقبالك❤️	Positive	STC
@STC_KSA كفو	Positive	STC
@STC_KSA بالتوفيق	Positive	STC
@STC_KSA @a__jeddah @0a0gn @KSA_JZ مبروك	Positive	STC
@STC_KSA شكرا لكم 👍🏻	Positive	STC
@STC_KSA @rjamjoom كفو 👏🏽👏🏽	Positive	STC
شكرا @STC_KSA	Positive	STC
@0a0gn @STC_KSA @a__jeddah @KSA_JZ مو قصدي احسد بالعكس يستاهلون مليون بعد لكن ابي اعرف وش الجوائز بس ☹️	Positive	STC
@antrohee1 @STC_KSA @a__jeddah @KSA_JZ الله يسعدك وعقبالك	Positive	STC
@KSA_JZ @5GvNc2ssZ623prb @STC_KSA @a__jeddah الله يبارك لك	Positive	STC
@nader_nader1799 @STC_KSA @a__jeddah @KSA_JZ الله يبارك فيك نادر وعقبالك	Positive	STC
@5GvNc2ssZ623prb @STC_KSA @a__jeddah @KSA_JZ الله يبارك فيك وعقبالك	Positive	STC
@antrohee1 @STC_KSA @0a0gn @a__jeddah الله يبارك فيك	Positive	STC
@nader_nader1799 @STC_KSA @a__jeddah @0a0gn الله يبارك فيك يارب وعقبالك ،	Positive	STC
@5GvNc2ssZ623prb @STC_KSA @a__jeddah @0a0gn الله يبارك فيك يارب وعقبالك	Positive	STC
@STC_KSA @a__jeddah @KSA_JZ الله يبارك فيكم بس ردوا خاص من اليوم اكلمكم😍❤️	Positive	STC
@STC_KSA @a__jeddah @0a0gn @KSA_JZ الف مبروك	Positive	STC
@alm3anah @STC_KSA @a__jeddah @0a0gn @KSA_JZ الله يفرحنا بفوزك	Positive	STC
@STC_KSA @a__jeddah @0a0gn مشكورين يا STC	Positive	STC
@STC_KSA @a__jeddah @0a0gn الله يبارك فيكم	Positive	STC
@maldafiri @STC_KSA العفو عزيزي	Positive	STC
شكرًا لدعمكم #بسطة_ماركت راعي رئيسي @STC_KSA https://t.co/y6O1lmRZ1o	Positive	STC
@a6allh_Y20 @STC_KSA ماشاء الله استخدامك للنت قليل 😳	Positive	STC
@ALFarshooti @STC_KSA اجل اطلبهم وماراح يقصرون	Positive	STC
@HaniRajab @STC_KSA STC هى خطي الرئيسي وماهم مقصرين معي بالخدمة والهدايا بعد😅 ولا يوجد معي معهم مشكلة نهائيا	Positive	STC
@ALFarshooti ليش و الـ @STC_KSA ماترتبت امورك معها، مايقصرون مع الجميع ترى بس انت انده عليهم.انا اشجع الوطن ومنتجات الوطن🤗	Positive	STC
@Dr_NZH07 @STC @STCKSA @STC_KSA بالعكس باقة ٤٠٠ انا استخدمها واخذت شريحتين بيانات وجهاز ايفون طالعه علي ٢٥٠ واعتبر موفر كثير	Positive	STC
@27arar @STC @STCKSA @STC_KSA ابشر	Positive	STC
@STC_KSA ي لبى العلا ❤️❤️	Positive	STC
@27arar @STC @STCKSA @STC_KSA واذا عندك دقايق او مفتوح داخل الشبكة تكلم كانك في المملكة ايضا مجربه	Positive	STC
#STC صاحبي اشترك فيها ممتازة https://t.co/avvgg4vfLH	Positive	STC
#STC مبروك على ( الألياف البصرية ) ياخوفي تكون السرعه مو شي بعد كم سنه 😭😭 تونا داخلين فيه 🙄	Positive	STC
@_kamal_Sharif @STC_KSA. مشگوور	Positive	STC
@992_56 @STC_KSA دايم تصير في الحي حقنا والحمد الله معاد خرب	Positive	STC
@ahm66566 مرحباأرجوا التواصل مع فريق العناية بالعملاء على حسابهم في تويتر وإن شاء الله يحلون مشكلتك( @STCcare ) -محمد	Positive	STC
@al58a1 @STCcare خذ نت مفتوح هذا والله حلوه	Positive	STC
@FayzGarni @STCcare ههههههههههههههههههههههههههههه نبي الالياف بس	Positive	STC
@HAMED__TH @STC1100 @STCcare خذلك STC اصرف لك	Positive	STC
@ibrg_ علما ان سرعتك بالعصر الحالي تعتبر متوسطة الا اذا كنت عميل للحبايبفي @STC_KSA https://t.co/tCbyzWdS4R	Positive	STC
@ifawazsv @STC_KSA مأخذ عقلي ال م رسيد س عرض STC.. ماعلينا اشكرك واذا عندك معلومه تفيد زودنا فيها	Positive	STC
@kxliv @STC_KSA ياختي ولا المودم حقهم الجديد كويس 👍مادري هو جديد ولا قديم بس اللي اعرفه انه فخممم	Positive	STC
@llizr_ @tfrabiah @SaudiMCI @STC_KSA @SouqKSA سيتم بكل تأكيد التواصل معكم لحل شكواكم بأقرب وقت	Positive	STC
@MayM91 @ibhm @STC_KSA غير صحيح ..الالياف البصريه من ركبتها ماقطعت معي ولا مره	Positive	STC
@mkreazem @aum_md @STC_KSA يعطيك العافية	Positive	STC
@Mohmmad_al3ni @STC_KSA 😂فديتك انا كل شي منك مقبول يالشيخ	Positive	STC
@mr07ksa @STC_KSA يعطيك العافية اخوي	Positive	STC
@naser3994 @992_56 @aum_md @STC_KSA يعوض أبشر وقت ماترجع الخدمة تواصل معي	Positive	STC
@soosoo21212 @STC_KSA شكراً STC 😂🏃🏻	Positive	STC
@STC_KSA الله يبارك فيكم	Positive	STC
@STC_KSA @flyincom الله يبارك فيكم ❤️	Positive	STC
@STC_KSA @k_kk2013 الف مبرووووك ياخالد	Positive	STC
@STC_KSA @k_kk2013 ألف مبروووووك	Positive	STC
@samii550 @STC_KSA اي الله يسعدك	Positive	STC
@SalimAlhazza @STC_KSA الله يسعدك تمام	Positive	STC
@saidalqahtaani @al3lobeee @STC_KSA نعم وخدمتهم رائعه لاكن STCويدل عليك اول حرفين من اسم الشركة 😂😂😂👍	Positive	STC
@ronaahmad1417 @STCcare تمام التمام يعطيك العافية	Positive	STC
@STC_KSA @MeshoRs @rasas40 مبروك	Positive	STC
@STC_KSA @MeshoRs @rasas40مبروك عليكم وعقبالي😍	Positive	STC
@STC_KSA @OceanBasketKSA كتر خيركم🤐	Positive	STC
@STC_KSA @OceanBasketKSA يستاهل ه الزين اكثر	Positive	STC
@STC_KSA @tntmooz @flyincom مبروك	Positive	STC
@STC_KSA السلام عليكم اود تقديم شكر لموظف بالاسم في احد فروع الرياض على الخدمة المقدمة منه هل بإمكاني التواصل معك على الرسائل الخاصة	Positive	STC
@STC_KSA السلام عليكم ورحمة الله وبركاته ممكن تفيدني بجهه اقدر اتواصل معها ابغا معلومات عن الشركه تفيد مشروعي شاكره لكم تعاونكم	Positive	STC
@STC_KSA اليوم بس بلعتكم 😍	Positive	STC
@STC_KSA اليوم هاديكم الله ايه هذا الشغل الزين. https://t.co/4oOufZj55h	Positive	STC
@STC_KSA بالتوفيق	Positive	STC
@STC_KSA تدرون صرت مٌغرمه بكم؟ ❤️	Positive	STC
@STC_KSA تسلم الحبيب	Positive	STC
@STC_KSA حبيبي ، كيف أفعل الواتس ؟ وبكم ؟ مشكور مقدماً 💜	Positive	STC
@STC_KSA سلام يا اتصالات انا مواطن وحاب افيدكم عندنا عدد١٢عماره في موقع مميزتعالوا استفيدوا قبل STCوركبوا لنا الياف/جدة خلف قاعة نرسيان👍🏻	Positive	STC
@STC_KSA شبكة ممتازة	Positive	STC
@STC_KSA شكرآ لكم	Positive	STC
@STC_KSA شكرا ماقصرت	Positive	STC
@STC_KSA عندي لكم فكرة حلوة ، إنشاء شركة طيران وفنادق ومكاتب سياحية 😃👍🏻	Positive	STC
@STC_KSA في انتظاركم انشا الله الفوز	Positive	STC
@STC_KSA لا كويس ضبط الحين ☺️	Positive	STC
@STC_KSA لوخليتوا الاستطلاع بهالطريقه أفضل مامدى رضى العميل لخدمات STC	Positive	STC
@STC_KSA ونشكركم ايضا تواجدكم في قرية #العنيق التابعه لقرية #المسيجيدديرتنا صارت احلا مع #STC https://t.co/1bmTAcQUCU	Positive	STC
@STC_KSA ياريت تفرحوني بهدية	Positive	STC
@STC_KSA يعطيك العافية يالطريقي	Positive	STC
@STCcare العفو يالغالي	Positive	STC
@STCcare اوك جزاك الله خير	Positive	STC
@STCcare ما طلبتو شي ( الله يحيك ) !!	Positive	STC
@STCcare ياليت شاكر لك استاذ خالد	Positive	STC
@STCcare يعطيگ العافيه ي اخ نواف بس فيه رقم للتفعيل	Positive	STC
@STCcare @zzezzo6 حياك الله اخوي.. ..أعتذر عن الإطالة .وسيتم التواصل معك خلال لحظات عبر الرسائل الخاصه .. وشكرأ. خالد	Positive	STC
@STCcare STC ان تسعد اكثر	Positive	STC
@STCcare ابشر ، بس للامانة يهمني الخدمة اكثر من الخصوصية	Positive	STC
@STCcare ابشر ربي يسلمك ❤️	Positive	STC
@STCcare اتمنى الرد اخوي الله يسعدك	Positive	STC
@STCcare احبك 😍	Positive	STC
@STCcare احبكككك 😍	Positive	STC
@STCcare أحبك😍😍💛💛	Positive	STC
@STCcare ارحب يالسمي ، قد تواصلت خاص	Positive	STC
@STCcare أرسلت لكم عبر الخاص وللأهمية الرد وفقكم الله.	Positive	STC
@STCcare أشكر لكم سعدت صدركم من الصباح و التفضل علي بالأجابه .ما فهمته أن فني التركيب هو من يتكفل بكل شي و أن كان التسليك داخلي ؟	Positive	STC
@STCcare الحين ضبط شكرا.	Positive	STC
@STCcare اوكك شكرا اخوي محمد	Positive	STC
@STCcare هلا حمودي احبك	Positive	STC
@STCcare مشكور ..	Positive	STC
@STCcare @king__asiaa ١-ركبوا الياف 🚀 بصرية وبنشترك بحي المعيزيلة فالرياض ✌🏻حي صغير لكن عظيم✌🏻️	Positive	STC
اكيد stc الافضل دايماً @STCcare #ما_الافضل_STC_زين_Stc	Positive	STC
#ما_الافضل_STC_زين_StcSTC FTTH للبلاستيشن خطييرة@STCcare افخم الشعب بيتهم وجوالاتهم STC بس يبيلهم يسوون كم عرض مغري لانترنت الجوال .	Positive	STC
@STCcare #ما_الافضل_STC_زين_Stc💕💕 طبعا سوا	Positive	STC
@_xxlii @STCcare ههههههههههههههههههههههههههههههههههههههههههههههههههههههههههههههههههههههههههههههههههههههههههههههههههههههههههههههههه يزينك😭😂	Positive	STC
@Doohab @STCcare هذا حال الدنيا ماعليها مستريح ياابو محمد الله يغنينا واياكم من واسع فضله	Positive	STC
@STCcare خلاص اشتغل شكرا وترا اسمي مو سيف	Positive	STC
@1MOGAT @STCcare يابن الحلال الاتصالات افضل شي بدون مبالغة او مدح لها يكفي شبكة اتصال قوية بلا منافس .STC وزين كل وحدة اردى من الثانية	Positive	STC
@1MOGAT @omar_44_ @STCcare @STC1100 في ذمتي واسأل عن كل حرفاني جربت الثلاث شركات ولقيت الاتصالات تخدمني في طريق سفر وبر ومدينهالبقيه !	Positive	STC
@STCcare @Consumer_Eye شكراً stc شركة رائدة وسرعة ممتازة ولله الحمد الى الامام ياشركتنا المفضلة دائماً	Positive	STC
@sam_770 @AlkamiK @STCcare والله فعلا ي ابو تميم من حولت عليها وانا مرتاح مرة	Positive	STC
@STCcare مشكورين الله يجزاك خير	Positive	STC
@almusaedi @STCcare اووه عذرا افتكرت الخطوط لا الاس تي سي تمام ردوا علي وخدموني ششكراً لهم	Positive	STC
@almusaedi @STCcare اتصلت ع الهاتف وخدمووني	Positive	STC
#ما_الافضل_STC_زين_Stc أكيد STC@STC_KSA	Positive	STC
#ما_الافضل_STC_زين_Stcطبعا @STC_KSA	Positive	STC
#ما_الافضل_STC_زين_Stcالأفضل وبلا منازع @STC_KSA	Positive	STC
#ما_الافضل_STC_زين_Stc صراحة لازين ولا STC خسارة الفلوس فيها@STC_KSA في نظري ليست سيئة بل أفضل منهم .	Positive	STC
#ما_الافضل_STC_زين_Stc@STC_KSAبسرعة النت وتغطية كامل المناطق بالتاكيد stc	Positive	STC
الافضل	Positive	STC
@STC_KSA فكرة الفيديو جميلة بس الإخراج والأدوات 👎🏾	Positive	STC
@OthmanMF @STC_KSA @STC عطوني الجوده وخدمه راقيه 🌹	Positive	STC
#ما_الافضل_STC_زين_Stcاكيد الام الحنون @STC_KSA 💔	Positive	STC
@OthmanMF @STC_KSA حياه اسهل 🌹	Positive	STC
@oss_noor @STC_KSA صادق وكلامك منطقي التغطية تفرق من موقع لموقع https://t.co/AtsRGBMiqz	Positive	STC
#ما_الافضل_STC_زين_Stcالجميع 👍👍شكرا @STC_KSA @STC @STCKSA	Positive	STC
#ما_الافضل_STC_زين_Stc واشوف ان stc الافضل بجدة اغلب جدة مغطية بشكل جيد والشركة المفضلة لي سواء انترنت او اتصالات او نت منزلي@STC_KSA	Positive	STC
❤STC ❤شهاده حق خدمات ممتازه وعملاء مميزين وكل يوم يتحفونا بشي جديد وسعيد كوني مشترك عندهم .	Positive	STC
❤STC ❤شهاده حق خدمات ممتازه وعملاء مميزين وكل يوم يتحفونا بشي جديد وسعيد كوني مشترك عندهم .	Positive	STC
❤STC ❤شهاده حق خدمات ممتازه وعملاء مميزين وكل يوم يتحفونا بشي جديد وسعيد كوني مشترك عندهم .	Positive	STC
Stc بلامنازع @STCcare	Positive	STC
#ما_الافضل_STC_زين_Stc أرى ان الأفضل @STC_KSA	Positive	STC
@M_lath00 @STC_KSA طلباتك أوامر امين 😂	Positive	STC
بصراحة كاسرعه @STC_KSA هي أفضل مع المنطقة اللي ساكنين فيها الأهم سرعه بغض نظر عن القيمة #ما_الافضل_STC_زين_Stc	Positive	STC
@STC_KSAالافضل على الاطلاق 💜💛💜 #ما_الافضل_STC_زين_Stc	Positive	STC
#ما_الافضل_STC_زين_StcSTC الافضل @STC_KSA	Positive	STC
#ما_الافضل_STC_زين_Stc انصح الجميع STC أفضل شركة محلية حتى الان .. @STC_KSA	Positive	STC
@1MOGAT @STC_KSA لا ولن اغير رقمي من STC لانها افضل شركة في السعودية والشركات الاخرى سيئة جدا و STC تملك اسرع انترن… https://t.co/Ta08h9UOsh	Positive	STC
@STC_KSA الشركات الإتصال القديمه أفضل ك سوا و مؤبايلي تفرق عن إلي توها جديده ك زين .	Positive	STC
@1MOGAT @STC_KSA كل الشركات زباله باستثناء اس تي سي وانتم بس طايحين فيهم مقاطعه والباقين انترنت زباله	Positive	STC
@STC_KSA شركاء قطاف جدا مميزين استفدت من هذي الميزة قبل فترة واشتريت شاحن سفري من سوق كوم ?	Positive	STC
@STC_KSA شكرًا STC ع الخدمة المميزة❤️	Positive	STC
@STC_KSA شركاء قطاف جدا مميزين استفدت من هذي الميزة قبل فترة واشتريت شاحن سفري من سوق كوم 👍🏼	Positive	STC
@STC_KSA جميل	Positive	STC
@AzizAlshamsan @STC_KSA مبروك اخوي عبدالعزيز. بالتوفيق لك ولشركتكم الرائدة 👍🏼	Positive	STC
@mnmn66l @STC_KSA وانا بعد جربته والله رهييييب	Positive	STC
@AzizAlshamsan @STC_KSA الف مبروووك وان شاء الله مزيد من التطور	Positive	STC
@s9sb @Amana940 @Amanatalriyadh @STC_KSA الله مير يجزاكم خير عسى بس ماتعبتم وانتم شايلينه	Positive	STC
@s9sb @Amana940 @Amanatalriyadh @STC_KSA كفو يا الحقنة	Positive	STC
@s9sb @Amana940 @Amanatalriyadh @STC_KSA كفو ❤❤❤❤❤❤	Positive	STC
@Az_a7_q @alkasir3 @ghamdisu @AmjedShacker @STC_KSA @STCcare الحمدلله راحه دقايق مجانية ونت أكثروبدون وجع راس ولا نصب ولهط	Positive	STC
@fi444fi @alkasir3 @ghamdisu @AmjedShacker @STC_KSA @STCcare بالتحويل تكسب خدمه افضل والبعض يظن بالتحويل انه لا يؤثر .	Positive	STC
@121_l7m @STC_KSA ابشرك عرفت الحل: مرحبا بك ارسال 8888 لـ900 لتحقق من الباقهو5559 لالغاء باقة سوا شهري بيسك 55 ريال	Positive	STC
@STC_KSA جممميييل	Positive	STC
شركة @STC_KSA تنجح في الوصول إلى سرعة 70.89 جيجابت بالثانية في اختبار شبكة #5G في #السعوديةالفيديو :… https://t.co/O0XswXdrdG	Positive	STC
@14_18_88نشكر لكم تواصلكم معنا.يتم التقدم بالشكوى إلى @STC_KSA من خلال موقعنا الإلكتروني.	Positive	STC
@STC_KSA صراحة أفضل شركة وشبكاتهم مغطية جميع المناطق واغلبكم معاه شرائح سوى ويتفلسف	Positive	STC
@Acelinai @STC_KSA اشتركي ارضي ترا احسن السرعة ثابته ومافي استخدام عادل	Positive	STC
@STC_KSA اشكركم علي ماتقدمون من خدمة انتم الافضل	Positive	STC
@AQAbdelaziz @EASPORTSFIFA @STC_KSA درر😂💔	Positive	STC
#راح_نفلسكم_stc_206 يا حسرتي على سنين مضت في @STC_KSA حولت الى @STC باقة واجد و لقيت كل تقدير و احترام😍	Positive	STC
@ava_199 @STC_KSA بالعافيه 👍🌷	Positive	STC
@om__eyad1 @STC_KSA الله يسمع منك لاعدمتك 😊	Positive	STC
@STC_KSA شفيكم عليهم حرام عليكم	Positive	STC
شكرًا 🌹🌺❤️ @STC_KSA https://t.co/vvi0eL1x9q	Positive	STC
@STC_KSA سبحان الله المكان جميل ي stc دائما متميزين بالاماكن الجميله واللي محد يعرفها استمروا ...ولكم كل الحب والتقدير	Positive	STC
@7MUHAAMD10 @ittihad @tai1381 @SPL @STC_KSA @alzeed2017 @MBCProSports @Hail_Now_ ماشاء الله من كثر التصميم مهو احترافي مسوي منشن لأس تي سي	Positive	STC
@b1_naif @STC_KSA ما شاء الله ، الله يعطيك الصحه	Positive	STC
@STC_KSA @Nawaf_Alseari @STCcare @Khaled_Biyari @Faisal_AlSaber مازالت صامده معي من عام 1422هـ https://t.co/HNme4PVi6I	Positive	STC
@STC_KSA @Nawaf_Alseari أبوي رقمة لة ٢٠سنة وماغيرها 👌🏻	Positive	STC
@STC_KSA @STCcare شكرا للقائمين على الشركة سوى إداريين او فنيين شكرا خدمة العملاء على جهودكم شكرا للجميع من يرد المكالمات او تويتر شكراSTC	Positive	STC
@Mn4r_00 @lISaddaw @e_x_e_r @STCcare @STC_KSA هيه الا على stc	Positive	STC
@TheeGodhimself المشكلة هاك وحاطين اسلحة اوبي ومدري ايش ويخسر 😂😂✋🏻✋🏻 شكرا شكرا اس تي سي😂😂💔💔@STC_KSA	Positive	STC
@azzamalaqil @STC_KSA ومستوى خدماتها يعتبر أفضل وتحاول تستجيب للشكاوي وترضيهم .. لكن الولاء مشكلة فينا💔	Positive	STC
@TheeGodhimself طبعاً الشكر يرجع الى اس تي سي شكرا لكم على الالياف اللي تحدت الهاك باللاق شكراااا من الاعمااااااق@STC_KSA	Positive	STC
خلال ٤ ساعات فقط جاء الرد بكل " ذوق " وشرحوا لي طريقة التفعيل ! @STCcare @STC_KSA https://t.co/HljMFPJK9h	Positive	STC
@AcnoToki @STC_KSA كويس أحمد ربك	Positive	STC
@STC_KSA @Nawaf_Alseari @STCcare @Khaled_Biyari @Faisal_AlSaber قاربت على ٢٠سنة مع الاتصالات السعوديةاتمنى من stc ان تقدم عروض للقدامى..	Positive	STC
@Amana940 @Amanatalriyadh @STC_KSA تم التواصل وشكرا لتجاوبكم	Positive	STC
@STC_KSA @Nawaf_Alseari @STCcare @Khaled_Biyari @Faisal_AlSaber والله اتذكرها كنها امس 🙂 ياخي ﷲ يرحم زمن الطيبين	Positive	STC
@STC_KSA بيانات مفوتره ونت سريع 👏🏻👏🏻 https://t.co/Oy2EKslyPn	Positive	STC
@STC_KSA انا عميل من نزل الجوال والخدمه عندكم طيبه ولا فكرت اشترك في شركه ثانيه	Positive	STC
@STC_KSA @Nawaf_Alseari @STCcare @Khaled_Biyari @Faisal_AlSaber انا عميل من يوم ما بدا خط سوا و يبدأ من 057 و كان مكون من 9 ارقام	Positive	STC
@sasa2010192196s @STC_KSA @STCBusiness @STCcare @STCHelpSA @STCKSA @STC الوظيفة على يدك؟😏🤔	Positive	STC
@STC_KSA #تطبيق_MySTCبالتوفيق https://t.co/l0Tv083lYr	Positive	STC
@STC_KSA شباب التقديم ع stc وين مكانهم بالرياض حق التوظيف تكفون فيدون	Positive	STC
@STC_KSA #تطبيق_MySTCبيانات مفتوحة مفوتر 👇🏽👍🏼 بصراحة مميزه والنت ما يقطع ✔️ https://t.co/f4Y9g64HTs	Positive	STC
@STC_KSA قام بحل المشكله تماماالاستاذ عبد العزيز عايد الذبياني افضل فني مر علي رجل قمه في الادب والاخلاق والاحترافيه اتمنى شكره وتقديره 2/2	Positive	STC
@STC_KSA جاري التحويل لـSTC لعيون مانشستر	Positive	STC
@STC_KSA مبروك لكم	Positive	STC
@STC_KSA #تطبيق_MySTCبيانات مفتوحة مفوتر 👇🏽👍🏼 بصراحة مميزه والنت ما يقطع ✔️ https://t.co/D0RKBMumRw	Positive	STC
@STC_KSA #تطبيق_MySTC يارب😍وشكرًا على ١٠٠ نقطة مجانا في قطاف 😍👌🏻 https://t.co/wf476l1pS7	Positive	STC
@STC_KSA احبكم يخي 😴🍺	Positive	STC
@STC_KSA stc_كنتم ولازلتم في قلوبنا. سنين قضيناها معكم. اختلفت الهوية وظلت خدماتكم المميزة في اذهاننا ... الله لا ي… https://t.co/67CUP0vF16	Positive	STC
@pvxvx @Jwrvi @STC_KSA شكراً	Positive	STC
@Nawaf_Alseari @STC_KSA معاك انا لابد نشكرا @STC_KSA على المصداقيه و حسن التعامل 👌	Positive	STC
معدل استهلاكي للإنترنت 😎من #تطبيق_MySTC .شكرا @STC_KSA https://t.co/2xJVYde2By	Positive	STC
زمان يـ @STC_KSA منذ 17 عاماً معكمومازلنا نستمتع بالتطور بخدماتكم. https://t.co/o02GCcLGS1	Positive	STC
@STC_KSA شكرا"على سرعة التجاوب لاصلاح تلفون منزلي الثابت في نفس يوم البلاغ تم الاصلاح فشكرا" من القلب	Positive	STC
@STC_KSA #تطبيق_MySTC اخذت شريحة بيانات ب٢٨٠ ريال فيها ٢١٠ قيقا باقي شهر وما استهلكت حتى ربعها نت يغني عن المفتوح 😍… https://t.co/BI2D0DmqvA	Positive	STC
@STC_KSA بالتوفيق	Positive	STC
@art200727 @Enaam1991 @STC_KSA كفو اذا عندك احد في @STC او @STCKSA	Positive	STC
@STC_KSA @rjamjoom والله منت هين يابو ياسر 😂😂😂... انجووووي	Positive	STC
@SoosViip2 @STC_KSA @a__jeddah @KSA_JZ يبارك فيك وعقبالك❤️	Positive	STC
@STC_KSA كفو	Positive	STC
@STC_KSA @halyami تستاهلون التكريم شركه رائده في مجال الاتصالات وفي خدمه المجتمع ممثلاً في المهندس حسين	Positive	STC
@STC_KSA بالتوفيق	Positive	STC
@STC_KSA @a__jeddah @0a0gn @KSA_JZ مبروك	Positive	STC
@STC_KSA شكرا لكم 👍🏻	Positive	STC
@STC_KSA @rjamjoom كفو 👏🏽👏🏽	Positive	STC
شكرا @STC_KSA	Positive	STC
@KSA_JZ @STC_KSA @a__jeddah @0a0gn يارجل مو قصدي احسد 😂 الله يجعلك اغنى رجل كنت ابي اعرف الجوائز فقط لاغير	Positive	STC
@0a0gn @STC_KSA @a__jeddah @KSA_JZ مو قصدي احسد بالعكس يستاهلون مليون بعد لكن ابي اعرف وش الجوائز بس ☹️	Positive	STC
@KSA_JZ @STC_KSA @0a0gn @a__jeddah يسلموووو يابوعابد	Positive	STC
@antrohee1 @STC_KSA @a__jeddah @KSA_JZ الله يسعدك وعقبالك	Positive	STC
@KSA_JZ @5GvNc2ssZ623prb @STC_KSA @a__jeddah الله يبارك لك	Positive	STC
@nader_nader1799 @STC_KSA @a__jeddah @KSA_JZ الله يبارك فيك نادر وعقبالك	Positive	STC
@5GvNc2ssZ623prb @STC_KSA @a__jeddah @KSA_JZ الله يبارك فيك وعقبالك	Positive	STC
@antrohee1 @STC_KSA @0a0gn @a__jeddah الله يبارك فيك	Positive	STC
@STC_KSA @0a0gn @a__jeddah @KSA_JZ الف مليون ترليون مبروك على الفووووز تستاهلونها وفالكم خيرررر	Positive	STC
@nader_nader1799 @STC_KSA @a__jeddah @0a0gn الله يبارك فيك يارب وعقبالك ،	Positive	STC
@5GvNc2ssZ623prb @STC_KSA @a__jeddah @0a0gn الله يبارك فيك يارب وعقبالك	Positive	STC
@STC_KSA @a__jeddah @0a0gn @KSA_JZ مبروووك	Positive	STC
@STC_KSA @a__jeddah @KSA_JZ الله يبارك فيكم بس ردوا خاص من اليوم اكلمكم😍❤️	Positive	STC
@HWE_9 @STC_KSA @a__jeddah @0a0gn @KSA_JZ الله يسعدك ياهدى ويفرحك اضعاف مضاعفه 🌹	Positive	STC
@STC_KSA @a__jeddah @0a0gn @KSA_JZ الف مبروك	Positive	STC
@alm3anah @STC_KSA @a__jeddah @0a0gn @KSA_JZ الله يفرحنا بفوزك	Positive	STC
@STC_KSA @a__jeddah @0a0gn @KSA_JZ مبروووك لهمم ...المسابقاات القديمة ما اعلنتم عن الفائزين ???	Positive	STC
@STC_KSA @a__jeddah @0a0gn مشكورين يا STC	Positive	STC
@STC_KSA @a__jeddah @0a0gn @KSA_JZ ممممممممبروك عقبالي	Positive	STC
@STC_KSA @a__jeddah @0a0gn @KSA_JZ مبروووووك وعقبالي	Positive	STC
@STC_KSA @a__jeddah @0a0gn الله يبارك فيكم	Positive	STC
@hdosari123 @STC_KSA تستاهل أبو مشاري هذا التكريم وأكثر تواضع وحب خدمة للجميع وابتسامة دائمة	Positive	STC
#شتقول_لشخص_تغير_عليك @STC_KSA هذا التغير السنع بارك الله فيكم https://t.co/NDyn9jXYNs	Positive	STC
@maldafiri @STC_KSA العفو عزيزي	Positive	STC
شكرًا لدعمكم #بسطة_ماركت راعي رئيسي @STC_KSA https://t.co/y6O1lmRZ1o	Positive	STC
@a6allh_Y20 @STC_KSA ماشاء الله استخدامك للنت قليل 😳	Positive	STC
@Mashhoursaad @MuneerSolami @STC @STC_KSA وجهك أبيض أخوي مشهور .. ويرحم والديك وجميع المسلمين	Positive	STC
@MuneerSolami @Mashhoursaad @STC @STC_KSA القصور حاصل وأنا أخوك ... وأن شاء الله بقادم الأيام راح تتغير نظرة الكل عن @STC_KSA الى الأفضل	Positive	STC
@FreeKeefe @MuneerSolami @STC @STC_KSA الله يبيض وجهك ويرحم والديك	Positive	STC
@_llai2 @STC_KSA حرام عليك اطلق شركه 🌝	Positive	STC
@ALFarshooti @STC_KSA اجل اطلبهم وماراح يقصرون	Positive	STC
@HaniRajab @STC_KSA STC هى خطي الرئيسي وماهم مقصرين معي بالخدمة والهدايا بعد😅 ولا يوجد معي معهم مشكلة نهائيا	Positive	STC
@ALFarshooti ليش و الـ @STC_KSA ماترتبت امورك معها، مايقصرون مع الجميع ترى بس انت انده عليهم.انا اشجع الوطن ومنتجات الوطن🤗	Positive	STC
@Dr_NZH07 @STC @STCKSA @STC_KSA بالعكس باقة ٤٠٠ انا استخدمها واخذت شريحتين بيانات وجهاز ايفون طالعه علي ٢٥٠ واعتبر موفر كثير	Positive	STC
@27arar @STC @STCKSA @STC_KSA ابشر	Positive	STC
@STC_KSA ي لبى العلا ❤️❤️	Positive	STC
@27arar @STC @STCKSA @STC_KSA واذا عندك دقايق او مفتوح داخل الشبكة تكلم كانك في المملكة ايضا مجربه	Positive	STC
#stc صاحبي اشترك فيها ممتازة https://t.co/avvgg4vfLH	Positive	STC
#stc مبروك على ( الألياف البصرية ) ياخوفي تكون السرعه مو شي بعد كم سنه 😭😭 تونا داخلين فيه 🙄	Positive	STC
#مسؤول_كفواخوي عبدالعزيز الشايجي موظف #stc@STC_KSA توقعت انه بس يخدمني تبين انه يخدم الي يعرفه والي مايعرفه	Positive	STC
@_kamal_Sharif @STC_KSA. مشگوور	Positive	STC
@1410Bakery @STC_KSA ويسسعددگ ياااربويبااارگ لگ في شغلگ	Positive	STC
@992_56 @STC_KSA دايم تصير في الحي حقنا والحمد الله معاد خرب	Positive	STC
@ahm66566 مرحباأرجوا التواصل مع فريق العناية بالعملاء على حسابهم في تويتر وإن شاء الله يحلون مشكلتك( @STCcare ) -محمد	Positive	STC
@al58a1 @STCcare خذ نت مفتوح هذا والله حلوه	Positive	STC
@FayzGarni @STCcare ههههههههههههههههههههههههههههه نبي الالياف بس	Positive	STC
@HAMED__TH @STC1100 @STCcare خذلك stc اصرف لك	Positive	STC
@ibhm @STC_KSA طرح جميل و خطة طموح تعطي ميزة تنافسية للشركة.	Positive	STC
@ibrg_ علما ان سرعتك بالعصر الحالي تعتبر متوسطة الا اذا كنت عميل للحبايبفي @STC_KSA https://t.co/tCbyzWdS4R	Positive	STC
@ifawazsv @STC_KSA مأخذ عقلي ال م رسيد س عرض stc.. ماعلينا اشكرك واذا عندك معلومه تفيد زودنا فيها	Positive	STC
@kxliv @STC_KSA ياختي ولا المودم حقهم الجديد كويس 👍مادري هو جديد ولا قديم بس اللي اعرفه انه فخممم	Positive	STC
@llizr_ @tfrabiah @SaudiMCI @STC_KSA @SouqKSA سيتم بكل تأكيد التواصل معكم لحل شكواكم بأقرب وقت	Positive	STC
@Lomxar @STC @Alhilal_FC @STC_KSA من اليوم و رايح بركب نت اس تي سي شكله افضل حتى الهلاليين حطوه	Positive	STC
@MayM91 @ibhm @STC_KSA غير صحيح ..الالياف البصريه من ركبتها ماقطعت معي ولا مره	Positive	STC
@mkreazem @aum_md @STC_KSA يعطيك العافية	Positive	STC
@Mohmmad_al3ni @STC_KSA 😂فديتك انا كل شي منك مقبول يالشيخ	Positive	STC
@mr07ksa @STC_KSA يعطيك العافية اخوي	Positive	STC
@naser3994 @992_56 @aum_md @STC_KSA يعوض أبشر وقت ماترجع الخدمة تواصل معي	Positive	STC
@soosoo21212 @STC_KSA اذا بسبب النت حرام عليك ، نتهم ممتاز جداً	Positive	STC
@soosoo21212 @STC_KSA شكراً stc 😂🏃🏻	Positive	STC
@STC_KSA الرجاء اعطاء دورات لموظفينكم في فرع شارع فلسطين في التعامل مع الجمهور شكرا لكم تقبلوا انتقادي لانني اراكم الافضل	Positive	STC
@STC_KSA الله يبارك فيكم	Positive	STC
@STC_KSA @flyincom الله يبارك فيكم ❤️	Positive	STC
@STC_KSA @k_kk2013 الف مبرووووك ياخالد	Positive	STC
@STC_KSA @k_kk2013 ألف مبروووووك	Positive	STC
@samii550 @STC_KSA اي الله يسعدك	Positive	STC
@SalimAlhazza @STC_KSA الله يسعدك تمام	Positive	STC
@saidalqahtaani @al3lobeee @STC_KSA نعم وخدمتهم رائعه لاكن stcويدل عليك اول حرفين من اسم الشركة 😂😂😂👍	Positive	STC
@ronaahmad1417 @STCcare تمام التمام يعطيك العافية	Positive	STC
@STC_KSA @MeshoRs @rasas40 مبروك	Positive	STC
@STC_KSA @MeshoRs @rasas40مبروك عليكم وعقبالي😍	Positive	STC
@STC_KSA @OceanBasketKSA كتر خيركم🤐	Positive	STC
@STC_KSA @OceanBasketKSA يستاهل ه الزين اكثر	Positive	STC
@STC_KSA @tntmooz @flyincom مبروك	Positive	STC
@STC_KSA السلام عليكم اود تقديم شكر لموظف بالاسم في احد فروع الرياض على الخدمة المقدمة منه هل بإمكاني التواصل معك على الرسائل الخاصة	Positive	STC
@STC_KSA السلام عليكم ورحمة الله وبركاته ممكن تفيدني بجهه اقدر اتواصل معها ابغا معلومات عن الشركه تفيد مشروعي شاكره لكم تعاونكم	Positive	STC
@STC_KSA اليوم بس بلعتكم 😍	Positive	STC
@STC_KSA اليوم هاديكم الله ايه هذا الشغل الزين. https://t.co/4oOufZj55h	Positive	STC
@STC_KSA بالتوفيق	Positive	STC
@STC_KSA بصراحة انا معجب جداً في خدماتكم الرائعة والتغطية بجميع أنواعها للشبكة والإنترنت 👍🏻 انتم بالنسبة لي المركز الأول	Positive	STC
@STC_KSA تدرون صرت مٌغرمه بكم؟ ❤️	Positive	STC
@STC_KSA تسلم الحبيب	Positive	STC
@STC_KSA تطبيق اكثر من رائع	Positive	STC
@STC_KSA حبيبي ، كيف أفعل الواتس ؟ وبكم ؟ مشكور مقدماً 💜	Positive	STC
@STC_KSA سلام يا اتصالات انا مواطن وحاب افيدكم عندنا عدد١٢عماره في موقع مميزتعالوا استفيدوا قبل STCوركبوا لنا الياف/جدة خلف قاعة نرسيان👍🏻	Positive	STC
@STC_KSA شبكة ممتازة	Positive	STC
@STC_KSA شكرآ لكم	Positive	STC
@STC_KSA شكرا ماقصرت	Positive	STC
@STC_KSA عندي لكم فكرة حلوة ، إنشاء شركة طيران وفنادق ومكاتب سياحية 😃👍🏻	Positive	STC
@STC_KSA في انتظاركم انشا الله الفوز	Positive	STC
@STC_KSA لا كويس ضبط الحين ☺️	Positive	STC
@STC_KSA لوخليتوا الاستطلاع بهالطريقه أفضل مامدى رضى العميل لخدمات STC	Positive	STC
@STC_KSA ونشكركم ايضا تواجدكم في قرية #العنيق التابعه لقرية #المسيجيدديرتنا صارت احلا مع #stc https://t.co/1bmTAcQUCU	Positive	STC
@STC_KSA ياريت تفرحوني بهدية	Positive	STC
@STC_KSA يعطيك العافية يالطريقي	Positive	STC
@STCcare العفو يالغالي	Positive	STC
@STCcare الله يسعدك يا استاذ فهاد سعادة بحجم السماء ع رقي تعاملك🌹👍	Positive	STC
@STCcare اوك جزاك الله خير	Positive	STC
@STCcare كفو شكرا احبك	Positive	STC
@STCcare ما طلبتو شي ( الله يحيك ) !!	Positive	STC
@STCcare ياليت شاكر لك استاذ خالد	Positive	STC
@STCcare يعطيگ العافيه ي اخ نواف بس فيه رقم للتفعيل	Positive	STC
@STCcare @MohmYahyaصراحة انا عندي stc في البيت والشبكة زي الفل🌹 مافيها كلامشكرا stc	Positive	STC
@STCcare @STCcare الإخوة موظفي شركة STC المحترمين حقا كنت اكن لكم كل الود والإحترام ، لكن عند زيارتي لفرعكم في منطقة القصيم	Positive	STC
@STCcare @zzezzo6 حياك الله اخوي.. ..أعتذر عن الإطالة .وسيتم التواصل معك خلال لحظات عبر الرسائل الخاصه .. وشكرأ. خالد	Positive	STC
@STCcare stc ان تسعد اكثر	Positive	STC
@STCcare ابشر ، بس للامانة يهمني الخدمة اكثر من الخصوصية	Positive	STC
@STCcare ابشر ربي يسلمك ❤️	Positive	STC
@STCcare اتصلت ع الشركه بيقولولي لازم ازور اقرب فرع ل stc لو تقدر تساعدني يكون افضل	Positive	STC
@STCcare اتمنى الرد اخوي الله يسعدك	Positive	STC
@STCcare احبك 😍	Positive	STC
@STCcare احبكككك 😍	Positive	STC
@STCcare أحبك😍😍💛💛	Positive	STC
@STCcare ارحب يالسمي ، قد تواصلت خاص	Positive	STC
@STCcare أرسلت لكم عبر الخاص وللأهمية الرد وفقكم الله.	Positive	STC
@STCcare أسعد الله صباحكم، وشكراً لكم لحسن التجاوب، وقد أرسلت الرقم.	Positive	STC
@STCcare أشكر لكم سعدت صدركم من الصباح و التفضل علي بالأجابه .ما فهمته أن فني التركيب هو من يتكفل بكل شي و أن كان التسليك داخلي ؟	Positive	STC
@STCcare أشكركم لتجاوبكم وفي انتظار الرد والحل للمشكلة التي أوردتها لكم بالخاص مع فائق تقديري.	Positive	STC
@STCcare الإخوة موظفي شركة STC المحترمين حقا كنت اكن لكم كل الود والإحترام ، لكن عند زيارتي لفرعكم في منطقة القصيم وشرائي لشريحة نت .يتبع	Positive	STC
@STCcare الحين ضبط شكرا.	Positive	STC
@STCcare السلام عليكم ..اليوم سحبت ع @STC1100 و نقلت خطي للشركة العملاقه STC و أصبحت بفخر احد عملاء STCقال STC قال 😂😂🙃🙃💔💔	Positive	STC
الله يعطيك العافيه اخوي عبدالعزيز واشكركم ع التجاوب السريع لانكم الافضل خلاص انتهت المشكله وتفعلت الباقه تحياتي لك	Positive	STC
تم الاتصال على 900 الرقم الموحد تم علاج المشكله الف شكر لكم stc حياه احلى	Positive	STC
جزاكم الله خير	Positive	STC
جزيت الجنه	Positive	STC
شكر لك	Positive	STC
شكرًا	Positive	STC
شكراً جزيلاً	Positive	STC
شكرا لحدمتكم الان اتابع المباراه بدون تغطيع شكرا لخدمه العملاء	Positive	STC
شكرا لك	Positive	STC
شكراً لكم رجعت الخدمة	Positive	STC
شكراً لكم سلطان، أحمد حضر الفني وقام بأصلاح المشكلة أقدر لكم سرعة تجاوبكم	Positive	STC
شكرا من القب انحلت مشكلتي الله يعطيكم العافيه	Positive	STC
شكرا وايد	Positive	STC
شكراً يعطيك العافيه اخوي احمد	Positive	STC
@STCcare ممتن لك على تعاونك الراقي	Positive	STC
RT @MM999999MM: @STCcare يعطيك العاافيه وشكراً لك	Positive	STC
RT @STC_KSA: مبروك للرابح معنا في فعاليات #قطاف_التميز @tntmoozوفاز بتذكرة سفر مقدمة من @flyincom ✈️	Positive	STC
RT @STC_KSA: مبروك للرابحين معنا بفعاليات #ويكند_STC@MeshoRs@rasas40انتظرونا في مسابقات وجوائز أكثر 🎁	Positive	STC
شكراً #STC على الفوز بالتذكرتين ... @STC_KSA ✌🏼️ رغم خسارة الريال مدريد للاسف لكن استمتعنا ... 😊 https://t.co/zV7RjSZ9A4	Positive	STC
شكراً @STC_KSA على الكرة https://t.co/PF3na6o5Tv	Positive	STC
شكرا على حسن تعاملككم وعلى شرايح البيانات الرائعة @STC_KSA @STCcare https://t.co/fErtxEaRVR	Positive	STC
شكرا لكم	Positive	STC
شكرا ع تجاوبكم السريع ، طيب بطلبكم طلب لو تكرمتو ممكن ؟	Positive	STC
اشكرك 😊	Positive	STC
تم وأسال الله أن أفوز معكم💞🌷	Positive	STC
شكرا ليكم جدا	Positive	STC
,@STC شكرا جزيلا خوي ولكن حاولت اكثر من مرة أتصل على هذا الرقم كما تفضلت بالرقم أعلاه ولم يتجارب معي يطلع عندي شاشة بيضاء	Positive	STC
,@STC @sa00d0 يارب افوز من جد 🌹	Positive	STC
تمت المشاركة فيها كلها من زمان يارب يجي دوري وأفوز😩	Positive	STC
,@STC لي قرابت سنه و انا استخدم STC و النت فيها ما شا الله حلو	Positive	STC
العرض حلو لو انه مستمر على طول	Positive	STC
هالعرض ماتلقاه إلا عند STC ✌🏼😉	Positive	STC
خدمه مميزة للعملاء 👍	Positive	STC
اجمل باقه فعلتها لي شهر مررره روعه	Positive	STC
@STC STC الافضل دايما	Positive	STC
@STC اول مره نستفيد منكم☺️❤️❤️	Positive	STC
@STC يأتِ بها الله ، انّ الله لطيفٌ خبير يارب افوز يارب 💙💙الاجابه /اتصل على *6060# وتمتع بأفضل عرض لك باليوم 😍❤️	Positive	STC
@STC @Alhilal_FC موفق الزعيم	Positive	STC
@STC نعم ابي اربح	Positive	STC
#راح_نفلسكم_211_stc بالنسبه لي انا اعششق مويايلي شكرا @STC انتم افضل شركة عرفت ان الـ 10 ريال تطول معكم 💔❤	Positive	STC
@STC اتصل على *6060# او إتصل على 1100 وقم بالضغط على 1 وتمتع بأفضل عرض لك اليوم	Positive	STC
@STC @Alhilal_FC موفق زعيمي💙	Positive	STC
@STC اتصل على *6060# او إتصل على 1100 وقم بالضغط على 1 وتمتع بأفضل عرض لك اليوم	Positive	STC
@STC @STC يارب افوز الاجابه *6060#	Positive	STC
@STC يارب افوز الاجابه اتصل على *6060# وتمتع بأفضل عرض لك باليوم👌	Positive	STC
@STC بالتوفيق يارب 🌹❤️🌹❤️🌹❤️🌹	Positive	STC
@STC 🌹❤️🌹❤️🌹❤️🌹 اتصل على#6060* او إتصل على 1100 وقم بالضغط على 1 وتمتع بأفضل عرض لك اليوم🌹❤️🌹❤️🌹❤️🌹	Positive	STC
@STC باقة واجد اكسترا باقة جيدة. ياليت تكون مشاركة الارقام مجانية في باقة راقي	Positive	STC
@STC يارب افوز يارب😍الاجابه /اتصل على *6060# وتمتع بأفضل عرض لك باليوم 😍👍.,	Positive	STC
@STC @STC اتصل على*6060#عرضي اليوميموباااايلي دايم غيرررر 🌹🌹🌹🌹🌹يااارب ياااارب افوز معكم☝☝	Positive	STC
@STC @STC يأتِ بها الله ، انّ الله لطيفٌ خبير يارب افوز يارب 💙💙الاجابه /اتصل على *6060# وتمتع بأفضل عرض لك باليوم 😍❤️	Positive	STC
@STC ياااااااااااارب ترزقني بفرحه 🙏😍اتصل على *6060# او إتصل على 1100 وقم بالضغط على 1 وتمتع بأفضل عرض لك اليوم ٌ	Positive	STC
@STC ياررب وتم ويارررب افوزز💜💜🙏🏻🙏🏻https://t.co/BdBbSbEntx	Positive	STC
@Abu_7a @STC فالك الفوز	Positive	STC
@Abu_7a @STC موفق 👏🏻	Positive	STC
@STC بصراحة أفضل شبكة بيانات فعلا قول وفعل STC	Positive	STC
@STC الله يوفقك ويسعدك رد علي 😔💔	Positive	STC
@STC اهلا وسهلا بك انشاءالله اكون من الفائزين	Positive	STC
@STC اتصل على *6060# او إتصل على 1100 وقم بالضغط على 1 وتمتع بأفضل عرض لك اليوم ٌ	Positive	STC
@STC @YouTube رهيب الاعلان 😂😂😂😂	Positive	STC
@foz_zd6 @STC موفقه	Positive	STC
@STC انا سحبت عليكم ورحت لزين 🚶🏽 والمبالغ اللي سحبتوها مني مسامحكم عليها دنيا واخره مع السلامه .. 🙂🖐🏼	Positive	STC
@STC الوظيفه حسب الشركه وارتب 3000 وفوق	Positive	STC
@STC اشكركم 💓	Positive	STC
#نطالب_بالتثبيت_في_جامعة_المؤسس @STC ارجو دعمنا وجزاكم الله خيرا	Positive	STC
@STC عروض جود وجود بلس جدا جميله👍🏻	Positive	STC
@STC عزيزي العميل نود إبلاغك أن الشكوى المقدمة من قبلك قد تم حلها بنجاح ونحن نعتذر عن أي مشكلةواجهتها شكرأ لتواص… https://t.co/EJjkZW29FD	Positive	STC
@STC انا ااعجبتني خدمة حلا ون ياليت تردونها	Positive	STC
@STC انا شاء الله افوز ماعمري فزت 😍	Positive	STC
@STC اتصل على *6060# او إتصل على 1100 وقم بالضغط على 1 وتمتع بأفضل عرض لك اليوم	Positive	STC
@STC الله يعطيك العافيه ع سرعه رد الجواب😘	Positive	STC
#ما_الافضل_STC_زين_Stcاكيد STC احسن شبكه اسرع نت 4g @STC @STC1100 @STCBusiness #STC#STC	Positive	STC
@STC مع STC الخير جايلي	Positive	STC
@STC شكرًا لمساعدتك	Positive	STC
@STC انا واجد سمارت خدمات وعروض 1100 جنااان	Positive	STC
#ما_الافضل_STC_زين_Stcشفيكم انتم كذا؟والله ان STC فخخخم 💖💖@STC	Positive	STC
@STC شركه جميله	Positive	STC
@STC احلى شركه	Positive	STC
حالياً @STC #ما_الافضل_STC_زين_Stc	Positive	STC
@STC اتصل على *6060# او إتصل على 1100 وقم بالضغط على 1 وتمتع بأفضل عرض لك اليوم.......	Positive	STC
@STC شكرًا لك	Positive	STC
موووووبايلي @STC #ما_الافضل_STC_زين_Stc	Positive	STC
#ما_الافضل_STC_زين_Stcتروح وترجع ماتلقا مثل STC @STC #STC_عالم_من_اختياري	Positive	STC
#ما_الافضل_STC_زين_Stc @STC 👍	Positive	STC
@STC #ما_الافضل_STC_زين_Stc #STC	Positive	STC
#ما_الافضل_STC_زين_StcSTC @STC	Positive	STC
@STC شكرا لك	Positive	STC
@STC @STC اتصل على *6060# او إتصل على 1100 وقم بالضغط على 1 وتمتع بأفضل عرض لك اليوم	Positive	STC
@STC #ما_الافضل_STC_زين_Stc STC	Positive	STC
@STC شكراً 😘😘	Positive	STC
من ناحية الاسعار موبيلي يا بوي #ما_الافضل_STC_زين_Stc@STC	Positive	STC
@STC اتصل على *6060# او إتصل على 1100 وقم بالضغط على 1 وتمتع بأفضل عرض لك اليوم	Positive	STC
#ما_الافضل_STC_زين_Stcاكيد احلى شركه👌@STC 🌹	Positive	STC
#ما_الافضل_STC_زين_Stc ههههههههههه. وهل يخفى القمر اكيد @STC STC افضل بكثير	Positive	STC
@STC *6060# يارب افرح قلبي	Positive	STC
@STC احوبكم 💜	Positive	STC
@fofa12v @STC شريحتي STC خدمتهم ممتازه وتعاملهم راقي ويردون بسرعه 😍👍	Positive	STC
@fofa12v @STC صدق والله شريحتي STC من عرفت شي اسمه شريحه ومستحيل اغيرها في اي شركه ثانيه 👍😍	Positive	STC
#ما_الافضل_STC_زين_StcSTC اكيد ماتعامل مع غيرهم 👍 @STC	Positive	STC
#ما_الافضل_STC_زين_StcSTC اكيد 👏🏻👏🏻👏🏻@STC	Positive	STC
@STC شكراً STC ع ٣٠ دقيقة المجانية مرة شكراً	Positive	STC
@STC اتصل على *6060# او إتصل على 1100 وقم بالضغط على 1 وتمتع بأفضل عرض لك اليوم ٌ	Positive	STC
@STC الله يسعدكم يكفي ثلاث ايام ب30 دقيقه اومجانيه بعد 👍	Positive	STC
@STC اشكركم على سرعت الرد وماتقصرون وخدمتكم 24 ساعه على خدمت العملاء انتم افضل من الشركات الثانيه للي تطول في الرد👌	Positive	STC
STC✨ #ما_الافضل_STC_زين_Stc@STC	Positive	STC
#ما_الافضل_موبايلى_زين_Stc@STC @STCKSA	Positive	STC
#ما_الافضل_STC_زين_Stc STC بالمرتبه الاولى يكفي انهم حاطين واي فاي لعملائها بالاسواق والمطارات 💓💓 @STC @STC1100 😥😙😍	Positive	STC
#ما_الافضل_STC_زين_Stc STC بالمرتبه الاولى يكفي انهم حاطين واي فاي لعملائها بالاسواق والمطارات 💓💓 @STC @STC1100 😥😙😍	Positive	STC
@STC #ما_الافضل_STC_زين_Stc	Positive	STC
@STC @STC عملائها الكرام كل يوم!اتصل على *6060# او إتصل على 1100 وقم بالضغط على 1 وتمتع بأفضل عرض لك اليوم الآن مع عرض	Positive	STC
@STC لبى قلبك😘	Positive	STC
@FSG90 @STC الله يجزاك خير ماقصرت ان شاء الله بشوف عنها	Positive	STC
@weeam1881 @STC من ناحية مكالمات جداً ممتاز والنت فقط خارج البيت يعتمد على طلعاتك	Positive	STC
#ما_الافضل_STC_زين_Stc@STC طبعاً افضل عروض ونت	Positive	STC
#ما_الافضل_STC_زين_StcSTC🌚❤️@STC	Positive	STC
#ما_الافضل_STC_زين_Stcاكيد @STC @STC1100	Positive	STC
@STC اتصل على *6060# او إتصل على 1100 وقم بالضغط على 1 وتمتع بأفضل عرض لك اليوم.	Positive	STC
@FSG90 @STC ❤️❤️يسلمو اخ فهد .. انا النت احتاجة فقط خارج البيت هل ينفع معي هذه الباقة	Positive	STC
@STC انشاء الله اربح الجائزه	Positive	STC
#ما_الافضل_STC_زين_Stc@STC من يوم طلعت جوال وانا رقمي STC الافضل والاجمل والاكمل 😂❤️.	Positive	STC
مافيه احلى من STC ❤️ @STC #ما_الافضل_STC_زين_Stc شرايكم فيني ☺️.	Positive	STC
#ما_الافضل_STC_زين_Stc @STC STC.	Positive	STC
#ما_الافضل_STC_زين_Stcجربت الثﻻث شركات وSTC هي اﻻفضل@STC اسعار معقولة.. خدمات مرضية.. تعامل باحترام..	Positive	STC
#ما_الافضل_STC_زين_Stcموباايلي بدون نقاش @STC	Positive	STC
STC اكيد 😍 @STC #ما_الافضل_STC_زين_Stc	Positive	STC
#ما_الافضل_STC_زين_StcSTC طبعاً 💙الولاء لهم @STC	Positive	STC
#ما_الافضل_STC_زين_Stc @STC	Positive	STC
#ما_الافضل_STC_زين_Stc الافضل دايما من وجهت نظري هي @STC 👍🏻👍🏻👍🏻	Positive	STC
#ما_الافضل_STC_زين_Stc انا شريحتي STC @STC	Positive	STC
#ما_الافضل_STC_زين_Stc @STC اكيييد الافضل يكفي انهم مايسرقون وياخذون زياده على الفواتير زي غييرهم😉	Positive	STC
#ما_الافضل_STC_زين_Stc@STC 👍👍	Positive	STC
#ما_الافضل_STC_زين_Stcالترتيب كالتالي 1️⃣ STC @STC 2️⃣زين @STCKSA 3️⃣ فاااااااارغ تحلمون يا @STCcare	Positive	STC
عن تجربة STC المركز الأول و بذآت باقة راقي فعلاً باقة راقية و ممتازة للفرد و العائلة شكراً STC @STC #ما_الافضل_STC_زين_Stc	Positive	STC
#ما_الافضل_STC_زين_Stcعن تجربه #STC افضل نت سريعخدمات وعروض @STC عالم من اختياري 👍🏻	Positive	STC
@STC #ما_الافضل_STC_زين_Stc STC 💙	Positive	STC
@STC نقلت رقمي من عندكم قبل اسبوع وللأمانة كنت عايش بجنة معكم الحين ابي ارجع لكم كيف ارجع الخط المفوتر لSTC؟	Positive	STC
#ما_الافضل_STC_زين_Stc1 ✔️@STC عالم من إختياري 😘	Positive	STC
@STC طريقة معرفة عرضك اليومي من STC الاتصال برقم *6060#بالتوفيق	Positive	STC
#ما_الافضل_STC_زين_Stc @STC STC 👌🏻👌🏻	Positive	STC
#ما_الافضل_STC_زين_Stc STC ثم زين ثم ................. بعدين تجي stc @STC @STCKSA	Positive	STC
STC STC تفوووووووووز @STC #ما_الافضل_STC_زين_Stc	Positive	STC
#ما_الافضل_STC_زين_Stc @stc الشركة المفضلة أحبها ❤@STCKSA زين النت المفوتر حلو@STC مسبقة الدفع جميلة ونت التجوال رائع 👍🏻	Positive	STC
مافيها تفكير طبعا @STCKSA و @STC https://t.co/MHB9Fl7Bji	Positive	STC
من افتتاح شركة @STC وانا عميل معهم من افضل الشركات اتصال ونت وخدمة عملاء #ما_الافضل_STC_زين_Stc	Positive	STC
@Peiilll @STC الحب مقابلك	Positive	STC
#ما_الافضل_STC_زين_Stc اكيد الحب @STC	Positive	STC
@STC @AbuNawaf @YouTube عندهم باقة 120 روعه ٦ قيقا تويتر اوبن انستقرام اوبن سناب اوبن و6 قيقا لتصفحات الاخرى تستحق الاشاده 👍	Positive	STC
.. @STC اتصل على *6060# او إتصل على 1100 وقم بالضغط على 1 وتمتع بأفضل عرض لك اليوم ٌ	Positive	STC
@STC اتصل على *6060# او إتصل على 1100 وقم بالضغط على 1 وتمتع بأفضل عرض لك اليوم..	Positive	STC
@Eyaaaad @STC @AbuNawaf @YouTube عجبني الاعلانات المبتكره زي اعلانك هذا	Positive	STC
@STC @STC اتصل على *6060# او إتصل على 1100 وقم بالضغط على 1 وتمتع بأفضل عرض لك اليوم	Positive	STC
@STC ،،،،، اتصل على *6060# او إتصل على 1100 وقم بالضغط على 1 وتمتع بأفضل عرض لك اليوم	Positive	STC
@STC ،، .....اتصل على *6060# او إتصل على 1100 وقم بالضغط على 1 وتمتع بأفضل عرض لك اليوم	Positive	STC
@Eyaaaad @STC @AbuNawaf اعجبني الاعلان الي مدري وش لون جاي	Positive	STC
@Eyaaaad @STC الله يرزقك من واسع فضله	Positive	STC
@Eyaaaad @STC @AbuNawaf @YouTube حتى إعلانك مبتكر ❤	Positive	STC
@Eyaaaad @STC @AbuNawaf فكرتها كويسها	Positive	STC
@STC @STC اتصل على *6060# او إتصل على 1100 وقم بالضغط على 1 وتمتع بأفضل عرض لك اليوم....	Positive	STC
@STC @STC اتصل على *6060# او إتصل على 1100 وقم بالضغط على 1 وتمتع بأفضل عرض لك اليوم.	Positive	STC
@STC الاجابه /اتصل على *6060# وتمتع بأفضل عرض لك باليوم 😍	Positive	STC
@STC @STC اتصل على *6060# او إتصل على 1100 وقم بالضغط على 1 وتمتع بأفضل عرض لك اليوم🔔🔔🔔🔔🔔	Positive	STC
@STC شكراً	Positive	STC
@STC ... اتصل على *6060# او إتصل على 1100 وقم بالضغط على 1 وتمتع بأفضل عرض لك اليوم	Positive	STC
@STC فدا 👋🏻 شكرا https://t.co/8OLr5z6ebQ	Positive	STC
عاد تو معطله عشان كذا ارسلت لكم ادافع عنكم دائما يا شركتي الجميله ، ولا انتو كل شي عندكم زين 💙@STC	Positive	STC
@STC ياليت عندي شريحة بيانات قويه مثل STC عشان اقدر التصفح الانترت بسرعه ياااارب😭😭😭	Positive	STC
@STC اتصل على *6060# او إتصل على 1100 وقم بالضغط على 1 وتمتع بأفضل عرض لك اليوم..	Positive	STC
@STC انشاءالله افوز وسويت كل الشروط	Positive	STC
STC تطلق حملة "#أنا_1100" لتطوير خدمة العميل https://t.co/L2A103ha5O @sabqorg@STC#ربي_سهل_اختباراتي	Positive	STC
@STC ربنا يكرم ان شاء الله	Positive	STC
@STC عملائها الكرام كل يوم!اتصل على *6060# او إتصل على 1100 وقم بالضغط على 1 وتمتع بأفضل عرض لك اليوم	Positive	STC
@STC مو زي بعض الناس استغفر الله الحمدلله حولنا منهم 😍💞💞	Positive	STC
احبكم يا احلى شركة بالكون @STC	Positive	STC
@STC *6060# بالتوفيق	Positive	STC
@STC @STC اتصل على *6060# او إتصل على 1100 وقم بالضغط على 1 وتمتع بأفضل عرض لك اليوم ٌ....	Positive	STC
@STC خدمة مميزه جدا من STC ألف شكرا	Positive	STC
@14Tig @sabqorg @STC من تجربتي STC فواتيرهم معقولة .. stc فواتيرهم دبل	Positive	STC
@STC شكرًا لكم تمت العملية .	Positive	STC
@STC عملائها الكرام كل يوم!اتصل على *6060# او إتصل على 1100 وقم بالضغط على 1 وتمتع بأفضل عرض لك اليوم	Positive	STC
STC تطلق حملة "#أنا_1100" لتطوير خدمة العميل https://t.co/LLAo6cOfe4 @sabqorg@STC by #STC via @c0nvey	Positive	STC
@STC رووعه	Positive	STC
@STC واااو	Positive	STC
@STC جميل🌹	Positive	STC
STC تطلق حملة "#أنا_1100" لتطوير خدمة العميل https://t.co/3Owh66FnRM @sabqorg@STC by #sabqorg via @c0nvey	Positive	STC
@STC .اتصل على *6060# او إتصل على 1100 وقم بالضغط على 1 وتمتع بأفضل عرض لك اليوم	Positive	STC
@STC اتواصل معكم عن طريق الاتصال ب1100او عن طريق حساب STC في التويتراو عن طريق تطبيق STCويارب افوز ويحالفني الحظ معكم	Positive	STC
@STC هلا وغلا بيك اسعدصباحكم	Positive	STC
@STC #أنا_1100 عن طريق ١- ١١٠٠ اتصال ٢- حساب STC على تويتر ٣- تطبيق STCأن شاءالله افوز	Positive	STC
@STC اتصل على *6060# او إتصل على 1100 وقم بالضغط على 1 وتمتع بأفضل عرض لك اليوم	Positive	STC
@STC شكرا	Positive	STC
@STC أمانة شركة STC تعتبر الأفضل بواقع أكثر من عشر سنين أستخدام وخدمة العملاء بتويتر سريع الخدمة ويستحق الشكر والتقدير	Positive	STC
@STC @STC_KSA كل الشكر لSTC والقائمين عليها على تعاملهم الراقي ومساعدتي عكس STC لم اجد الى الان تجاوبزادكم الله رفعه وبسطه بالرزق	Positive	STC
@STC ١١٠٠ افضل خدمة عملاء	Positive	STC
@STC عجزت ريتويت ولايك ورد تكفون نبي نفوز بشيء 😭😭😭😭😭😭يارب افوز يارب	Positive	STC
@STC @YouTube ابي افوز معاكم	Positive	STC
@STC شكرا STC	Positive	STC
@STC شكرا لكم افضل شركة من واقع تجربة	Positive	STC
@STC @re00hh ودمتوا انتم في العطاء	Positive	STC
@STC @STC يارب وماخاب من قال يارب 💙💙الاجابه /اتصل على *6060# وتمتع بأفضل عرض لك باليوم	Positive	STC
🍀🍀🍀🍀🍀🍀🍀🍀..@STC عملائها الكرام كل يوم!اتصل على *6060# او إتصل على 1100 وقم بالضغط على 1 وتمتع بأفضل عرض لك اليوم الآن مع عرض..	Positive	STC
@STC شكرا	Positive	STC
@STC يارب وماخاب من قال يارب 💙💙الاجابه /اتصل على *6060# وتمتع بأفضل عرض لك باليوم	Positive	STC
@STC ابي اربح ممكن	Positive	STC
@STC @STC اتصل على *6060# او إتصل على 1100 وقم بالضغط على 1 وتمتع بأفضل عرض لك اليوم	Positive	STC
@STC ان شالله نربح	Positive	STC
@STC الف مبرووك💙	Positive	STC
@STC مبروك	Positive	STC
@STC عملت رتويت ولايك يلا ربحوني❤️❤️احبكم STC🙏🏻	Positive	STC
#ما_الافضل_STC_زين_Stcعن تجربة:STC في قوة النت أفضلزين في عروض المكالمات أفضلاما STC لا شيء يذكر @STCKSA@STC @STC_KSA	Positive	STC
@STC شكراا لكم	Positive	STC
@STC شكرا لكم	Positive	STC
@STC شكرا لكم	Positive	STC
@STC @STC اتصل على *6060# وتمتع بأفضل عرض لك باليوم👌🏻	Positive	STC
شكرا @STC 🙄. https://t.co/hcFqpzk1lT	Positive	STC
@STC شكرا لك علي ردك	Positive	STC
@STC يارب افوز يارب 💙الاجابه /اتصل على *6060# وتمتع بأفضل عرض لك باليوم	Positive	STC
@STC أنا وأبنائي وبناتي نفخر بأننا من عملاء STC وبس 👍🏻	Positive	STC
@STC شكراً	Positive	STC
@STC1100 شكراً لكم	Positive	STC
@STC1100 شكراً 🌹	Positive	STC
@STC1100 شكرا لتواصلكم	Positive	STC
المفروض اس تي سي ينمسح من المقارنه اصلنانا استعمل STC والله ولا مره علق او صار يعلق انصحكم فيه.@STC1100💕#ما_الافضل_STC_زين_Stc	Positive	STC
@STC1100 انا عندي شريحة نفس الشركه اللي متعاملين معاها لكن للامانه ولاقد انقطعت لا نت ولا خدمة اتصال	Positive	STC
@STC1100 شكرًا STC	Positive	STC
@STC1100 شكرا للاتصال و حل المشكلة و التجاوب عبر البريد الالكتروني -تحياتي	Positive	STC
@STC1100 كالعادة STC قمة في الردود ومتابعة آراء العملاء شكرا لتواصلكم	Positive	STC
@STC1100 اجابه واضحة اخي YB اشكرك عزيزي.	Positive	STC
@STC1100 انحلت المشكلة مشكورين	Positive	STC
@STC1100 شكرا لكم	Positive	STC
@STC1100 الله يعطيك العافيه .	Positive	STC
@STC1100 شكرًا	Positive	STC
@STC1100 شكراً	Positive	STC
@STC1100 شكرا جزيلا	Positive	STC
@STC1100 شكرا اشتغلت الشريحه	Positive	STC
@STC1100 كفو ❤🌷	Positive	STC
@STC1100 شكرا 💚	Positive	STC
@Moha_bahusayn @STC1100 على الرحب والسعة. نتمنى لك يوماً سعيدا!ً	Positive	STC
@axiom_ksa @STC1100 شكرا جزيلا	Positive	STC
@STC1100 شكرا على التفعيل الاشتراك,, اذا ممكن تذكرو السببب توقف الاشتراك.	Positive	STC
@STC1100 الله يعطيك العافيه	Positive	STC
@STC1100 ليس غريبا عليكم سرعة الاستجابة فشكرا لكم على التواصل معي الف شكر	Positive	STC
@STC1100 تمت معالجة المشكله شكراً	Positive	STC
@STC1100 شكرا الله يعطيكم العافيه 💕💕	Positive	STC
@STC1100 الله يجزاكم بالخير	Positive	STC
@STC1100 في وظايف لخريج الثانويه في الاحساء	Positive	STC
@STC1100 كل الشكر لفريق STC تم حل الأشكال والف شكر وتقدير لتواصلكم	Positive	STC
@STC1100 @p_f3fz وشكراً	Positive	STC
اشكر STC لمستوى الخدمة الجيد الي قاعده تقدمه @STC1100	Positive	STC
@STC1100 شكرا لكم	Positive	STC
#انا_وSTC_مع_الهلالوانا و #زين كمان مع الهلال😍💙💙بالتوووووفيق زعيمي😘😘	Positive	STC
#أنا_وSTC_مع_الهلال 💙بأذن الله فوز هلالي ساحق ٢/٠والف شكر ل #STC ودعمها الغير مستغرب للهلال وجماهيره 😘💙	Positive	STC
@abd96_alrahman أهلاً وسهلاً أهلاً وسهلاً يمكنك الانضمام الى #STC والبحث عن الوظائف الشاغرة او التسجيل ببرنامج الصفوة لتدريب	Positive	STC
@abdulelahald @STC افا .. ليه ..بروح أنا وأياك ان شاء الله .. #STC كريمين وحنا نستاهل .. بس هم يحبون المحارش..	Positive	STC
@alamoudiama أهلاً وسهلاً يشرفنا انضمامك الى #STC ويمكنك التحويل من المشغل الاخر إلى #STC بكل سهولة وسيكون للعميل	Positive	STC
@alhamdan_k @STC يعطوني إياه بيجيك هديه أتمنى انك تقبلها 😎	Positive	STC
@HaithamZahrani أهلاً وسهلاً يشرفنا انضمامك الى #STC ويمكنك التحويل من المشغل الاخر إلى #STC بكل سهولة وسيكون للعميل	Positive	STC
@J_r_y232 أهلاً وسهلاً يشرفنا انضمامك الى #STC ويمكنك التحويل من المشغل الاخر إلى #STC	Positive	STC
@STC @ABBBKK والله اني احبكم وعندنا اثنين من المودمات حقكم وتياعدون العملاء مو مثل بعض الشركات تعرفونهم هههههههههه😂😂😂😂😂😂😁😀😀😍😘	Positive	STC
@STC @fans_of_alhilal كفو STC بالتوفيق للزعيم	Positive	STC
@STC @fans_of_alhilal يا خوي ما نبي تذاكر نبي وظائف عندكم لحملة الدبلوم تخصص دعم فني	Positive	STC
@STC @raedintrawi كلام جميل	Positive	STC
@STC أتمنى أنكم تعطوني اللون اللي إخترته هديه تراني أحد عملاء STC اللون اللي إخترته ( أسود )	Positive	STC
@STC اشكركم عالتوضيح و الاهتمام فعلاً شركة مميزة بعكس البقية من شركات الاتصالات الموجودة عندنا	Positive	STC
@STC السلام عليكم ورحمة الله وبركاته ممكن تفيدني بجهه اقدر اتواصل معها ابغا معلومات عن الشركه تفيد مشروعي شاكره لكم تعاونكم	Positive	STC
@STC الف مبروك شريكنا الموقر اش تهدوني بهذه المناسبه 😘😍😃	Positive	STC
@STC اللون الملكي دائماً ، طبعا إذا فكرت اشتري سامسونج 🌚	Positive	STC
@STC اللون الي يجي منكم حلو	Positive	STC
@STC انا اشوف الفضي وSTC قدها 😉	Positive	STC
@STC جوالي STC كرمال الهلال	Positive	STC
@STC شكراً #STC	Positive	STC
@STC شكرا جزيلا	Positive	STC
@STC شكرا لكم على سرعة التفاعل شي مفرح ومثلج للصدر	Positive	STC
@STC شكككرااا	Positive	STC
@STC فكرة جميله بس كيف الآب ستور😢	Positive	STC
@STC كل شي منكم حلو 😎	Positive	STC
@STC كل ما احتجت إليه حتى يتم الرد علي في STC (23 دقيقة) !!!أشكر #STC على سرعة الرد والتجاوب مع عملائها https://t.co/9KBlK4AQhp	Positive	STC
@STC ما قد أخذت جلكسي بس اذا بجرب بجرب اسود فخم	Positive	STC
@STC STC اتمنى تتوسعون في الالياف بالرياض حي الصحافة نتظركم	Positive	STC
@STC هديه منكم انتو وذوقكم ماراح اردكم	Positive	STC
@STC و ي زيييينكم انتو بعد ههههه	Positive	STC
@STC والله تحتار مابين الاسطوره والزوري كلهم يستاهلون 👌💙💙	Positive	STC
@STC ولو بتعطوني هديه بيكون اجمل	Positive	STC
@STC ويازين الخميس مع STC ❤️	Positive	STC
@STC يستاهل الشلهوب	Positive	STC
@STC 😉انتما كرما ونحن نستاهل	Positive	STC
@STC1100 شكرا	Positive	STC
@STC1100 هل بالامكان تفعيل خدمة تجوال الدولي والتأكد من ذلك وذلك نظرا لسفري بعد عدة ايام لمصر ،،شاكرا ومقدرا تعاونكم معنا في سبيل راحتنا	Positive	STC
@STC1100 @mnsr_999 STC الرجاء حل مشكلة منصور؛ يكفي أنه يعيلنا نحن الفقراء.	Positive	STC
@STC1100 @Rayyan141777 الاتصالات صارت شركة جيدة حالياً من حيث النت ومن حيث التغطية بال 3g و 4g ومن حيث النت المفتوح لا ٦٠ قيقا ولا شي	Positive	STC
@STC1100 @ReemRajab سلام عليكم طيب ممكن تخدمونا الله يسعدكم ؟	Positive	STC
@STC1100 اشكر تفاعلك وطولت بالك ... يعطيك العافيه🌹	Positive	STC
@STC1100 أشكركم على تفاعلكم السريع مع عملاء STC لكم مني جزيل الشكر🌹	Positive	STC
@abuabdelelah @STCcare @STC ابشر ياشيخ كلمني بس واجيبلك مودم الياف بصريه فائق السرعه مجانا من #STC https://t.co/3uA18ckADx	Positive	STC
@almmg888 @STCcare @STC1100 @STCHelpSA بعض الاحياء في الياف ممتازه جدا	Positive	STC
@STC_KSA @McitGovSa @CITC_SA @Amanatalriyadh @sabqorg @STC @STC1100 @nazaha_gov_sa @ajlnews لضمان حق جميع المواطنين بخدمة مميزة	Positive	STC
قولتلك شبكة والبرنامج حقهم جيد ويمديك تخش شات مع موظف ويخدمك	Positive	STC
افضل شريحه عندى تغطيه كامله	Positive	STC
الحمدلله والشكر له أولا وأخير ثم الشكر كل الشكر لشركة STC على المصادقية الجميلة مع العملاء وخصوصا مسابفة رنان #STC @STC	Positive	STC
شركات الاتصالات وخصوصاً STC و STC قاعدين يقومون بدور اجتماعي مميز جداً .. شكراً	Positive	STC
الحمد لله؛ تم توثيق أرقامي في كل STC و STC و STC بكل يسر وسهولة. شكرًا لكم على إتاحة هذه الخدمة المتميّزة.	Positive	STC
@STC1100 أهلاً وسهلاً تم الأصلاح والحمدلله ولكن أرجو منكم سرعة في رد على العملاء وكل التوفيق لكم	Positive	STC
@STC1100 تسلم ما تقصر للتو دقيت عليكم .. تشكر	Positive	STC
@STC1100 تشكرات اخوي ضبط 💙💙	Positive	STC
@STC1100 تم ارسال رسالة على الخاص وشكرا لتفاعلكم السريع اتمنى حل لمشكلتي وجيزتم خيرا	Positive	STC
@STC1100 تم عمل المشاركة بنجاح شكرا	Positive	STC
@STC1100 شكرًا	Positive	STC
@STC1100 شكرا ML	Positive	STC
@STC1100 شكرًا . يعطيك العافية	Positive	STC
@STC1100 شكرا بس ترا ليا كم ساعة رسلتلكم وفعلت وخلصت	Positive	STC
@STC1100 شكرا جزيلا	Positive	STC
@STC1100 شكراً جزيلاً	Positive	STC
@STC1100 شكرا جزيلا ع الرد :) لكن لدي سؤال : ما المقصود برقم الحساب ؟ و أين أجده ؟	Positive	STC
@STC1100 شكراً ع الجواب السريع.. قبل سنة تقريباً طلعت لي شريحة وسويت منها نسخة ثانية وما اشتغلت.. احتمال اقلب شريحتي من جديد ونجرب	Positive	STC
@STC1100 شكرا على تواصلكم... أرجو الاطلاع على البريد المرسل لكم	Positive	STC
@STC1100 شكراً على سرعة تجاوبك	Positive	STC
@STC1100 شكرا لإهتمامكم	Positive	STC
@STC1100 شكرا لحسن تعاملكم 🌹🌹	Positive	STC
@STC1100 شكراً لك	Positive	STC
@STC1100 شكراً لك عزيزي.	Positive	STC
@STC1100 شكرا لكم ❤️	Positive	STC
@STC1100 شكراً لكم تم تفعيل خدمة حلا الشهرية ب 120	Positive	STC
@STC1100 شكرا لكم تواصلت مع الدعم 1100 وتم حل المشكله	Positive	STC
@STC1100 شكرا STC الان استلمت الجهاز من فرع التحليه بجده	Positive	STC
@STC1100 شكراً يعطيك العافية	Positive	STC
@STC1100 شكررا 😍	Positive	STC
@STC1100 كيف نتكم كويس 🙊	Positive	STC
@STC1100 و شكرا لك و انتظر انهاء الطلب و التفعيل	Positive	STC
@STC1100 يسعدلي صباحك اخوي ممكن خاص	Positive	STC
@STC1100 يعطيك العافية. تحياتي.	Positive	STC
@STC1100 يعطيك العافيه. ممكن تضيفني عشان ارسل لك البيانات	Positive	STC
@STC1100 يعطيكم العافيه ..جهودكم طيبه وتشكرون عليها	Positive	STC
@STC1100 يعطيكم الف عافيه شاكره تعاونكم جزاكم الله اعلى مراتب الجنه 🌸	Positive	STC
@mohd_alhejazi @STC احسن ماسويت 👍،، واذا ماشفت تجاوب ،، انصحك في الاتصالات حيعطوك عروض مميزة مجرد ماتنقل شرايحك عليهم	Positive	STC
@Mosaadalmarshad @A_Duw @STC احسنت	Positive	STC
@MOTEBABDULLAH @battal_gh @STC كلهم نجوم ماقصروا	Positive	STC
@MOTEBABDULLAH @STC الزوري افضل لاعب فالمباراة	Positive	STC
@MOTEBABDULLAH @STC صعب الاختيار !! كلهم يستاهلون . لكن لابراء الذمه س أضع القرعه ..	Positive	STC
@OnlyMufc_ @STC1100 قل الحمدلله غيرك ماعمره لقاها 💔😿	Positive	STC
@sd_647 أهلاً وسهلاً يمكنك الانضمام الى #STC والبحث عن الوظائف الشاغرة او التسجيل ببرنامج الصفوة لتدريب المواهب الشابة	Positive	STC
@Saad11Mr أهلاً وسهلاً يشرفنا انضمامك الى #STC ويمكنك التحويل من المشغل الاخر إلى #STC بكل سهولة وسيكون للعميل	Positive	STC
تطبيق STC ممييزساعة التطبيقات اندرويد	Positive	STC
تطبيق STC ممييزساعة التطبيقات اندرويد	Positive	STC
STC تقدم شريكها الهلال قبل نهائي كأس_ولي_العهد اليوم لبّى خويّن مايخلّي خويّه خطوة تفاعلية تحسب لهم	Positive	STC
لو انا بمكان STC ، بيكون التالي لأبو البندري:رقم راقي مدفوع مدى الحياة10 ايفوناتفرع وباقة بأسمه للرياضينيستاهل ولاري	Positive	STC
وش حلاوة الدوام STC مركز الاتصال	Positive	STC
تم الاتصال على رعاية العملاء وحل المشكلة شكرًا لكم	Positive	STC
شكراً لانك كنت دايما معايا فى كل حاجة و عمرك ماتخليت عنى موبايلى	Positive	STC
مقارنة شاسعة بين @STCcare و @STCHelpSA في تعرفت الدقيقه ففي STC 0.19 هلله للدقيقه ، بعكس STC وهي 0.55 هلله !	Positive	STC
@STCHelpSA هلا اخوي يحيى،، اشكرك فقد تم التواصل عبر اتصال مع الاخ عبدالعزيز، وتم تقديم المساعده.. مساكم STC 😊	Positive	STC
@STCHelpSA شكرا STC 👍🏼	Positive	STC
@STCHelpSA شكرا علي تفاعلكم .	Positive	STC
@STCHelpSA تم ارساله ع الخاص شكرا لك اخوي عبدالله	Positive	STC
@STCHelpSA شكراً ابو داحم.	Positive	STC
شكرا فيصل *حمد@STCHelpSA	Positive	STC
@STCHelpSA عندي باقة شباب ومرتاح فيها شكرا	Positive	STC
@tariqaljaser @STCJo @STCKuwait @STCSudan @STCBahrain @STCKSA @STCHelpSA شكرا اخ طارق اعتذر ان صوتي واصل اخر تويتر مانتبهت ان في صدى🌹	Positive	STC
@STCHelpSA شكراً لكم ❤	Positive	STC
@m7md22j @STCHelpSA حول الى ٣ جي راح يضبط النت معك	Positive	STC
@turki0502 @STCHelpSA شكرا ماقصرت	Positive	STC
@STCHelpSA اوكي شكرا	Positive	STC
@STCHelpSA شكرآ لكم على حسن التعامل	Positive	STC
@STCHelpSA ايه الحين كويس شكرا	Positive	STC
@halo5210 @STCHelpSA افيدهم ب ١٩ رقم خلف الشريحة بعد الانتظار ٤ ايام وسيعاد تهييئة الشريحة وستشعر بالفرق لمدة ساعتين وسيرجع كل شيء كما كان	Positive	STC
@STCHelpSA شكرنا لك. طيب يمديني اشترك اكثر من شهر بهلخدمه مثلنا ستت اشهر	Positive	STC
ان شاء الله ، شاكر لك تعاونك 💕	Positive	STC
@STCHelpSA شكرا اخ رشيد	Positive	STC
أشكركم على خدمتكم	Positive	STC
@STCHelpSA سلمتم	Positive	STC
اخي الكريم لدي موقع ارضين متجاورتين في موقع مميز يخدم مشتركين كثيرون واحب ان اعرضه على الشركة لتركيب برج في الموقع	Positive	STC
@STCHelpSA شكرررا على سرعه الرد	Positive	STC
@S0soo___1985 @cs92xGkz2MZtG91 @STCHelpSA قيمتها الشريه ١٤٩شريحه واحده ممتازه انا استعملها الان	Positive	STC
@STCHelpSA الاتصال على خدمة العملاء فعال 24 ساعه	Positive	STC
@STCHelpSA ي أحمد الله يسعدك أن شاء الله ارسلتهه	Positive	STC
@hijababnmdlij @STCKSA مشتركة لي ثلاث سنوات ماشفت اي شي غلط وزوجي له سنوات كتير مشترك ومرتاح للشركةانا عندي شريحتين STC وSTC STC افضل	Positive	STC
@3Z_X01 @STCKSA جزاك الله خير واشكرك على تفاعلك	Positive	STC
@a1harbi_ksa @STCKSA @STCcare قلتلك STC هريب يخسى آس تي سي الشركة خراء 😷😷	Positive	STC
@adil102955 @STCKSA @afnan_mx كل هذا لايلغي عروضكم الجميلة والأوفر وتحسن شبكتكم قلت هذا الكلام لانها حصلت معي لمرة واحدة في موضوع الهللة	Positive	STC
@reettaalll @STCHelpSA جربت كل شريحه بيانات وأفضلها شريحه STC والله ، عاد مدري عنك	Positive	STC
@STCHelpSA اشكركم على تجاوبكم السريع	Positive	STC
@STCHelpSA شاكر لك تعاونك 🌹	Positive	STC
@STCHelpSA شكراً STC على الاتصال الصاروخي https://t.co/auWWfCgVVv	Positive	STC
والله العظيم STC افضل @STCKSA @STCHelpSA @STC	Positive	STC
@STCHelpSA STC طبعا✌🏼💃🏻	Positive	STC
@STCHelpSA ما احتاج اي مساعدة شكرا على ما تقدموه	Positive	STC
@STCHelpSA اوك شكراً لك💛	Positive	STC
@CITC_withU @STCcare اقل شي نشطو شريحتي حق النت ليش التلاعب بالناس والاستهتااااااااار	Negative	STC
@CITC_withU @STCcare الـ ١١ ريال الفائض سينهبونها باستغلال الثغرات والضحية المواطن١٠ ريال من مليون عميل كأقل تقدير عشرة مليونشركة اختلاسات	Negative	STC
@CITC_withU @STCcare تقدمت بطلب رقم 36112811وحطيت الاحداثي حق الموقع اشتكيت لرئيس شركتكم خالد البياري وطنش مايرد بلغت وزير الاتصالات مانفع	Negative	STC
@CITC_withU @STCcare تم حل المشكلة من عنديالباقة ١١٩ شحنت ١٢٠ ولم يقبلوازودت الشحن ١٠ ريال وتفعلت على طولالموضوع من ذمتي لذمة الهيئة	Negative	STC
@CITC_withU @STCcare مافي مسؤل يرد او يقول اش عند هذا الموطن المزعج	Negative	STC
@CITC_withU @STCcare معقول ماعندكم حل تشغلو البرج الخربان خالد البياري مختفي وخدمة العملاء مطنشين واذا كلمناكم شغلتو برنامج الرد الالي	Negative	STC
@CITC_withU @STCcare والله مايصير لامسؤل يحل المشكله ولاخدمة عملاء يردو تطنيش واستهتااااااااار حي الفلاح ثلاثه بدون نت ومافي امل تحلو مشكلتن	Negative	STC
@Clint400 @STC_KSA انا اعاني كثير منه	Negative	STC
@DnGLr3 @STC_KSA من جد ضبطوها بعدين ابتكرو العالم وصلت G5 وانت لاحول ولاقوة	Negative	STC
@Dr_fahd52 @STCBusiness @STC_KSA والله لو سرعتي كذا بنجلط من القهر من اول اسبوع😑	Negative	STC
@emadalghilan @STC_KSA للأسف stc 👎 نصيحة اخو اتجه موبايلي على الاقل يحترموك كعميل!!	Negative	STC
@engfaisalabdul @Abdulaziz_333 @STC_KSA هذا استخفاف بالعملاء وانعدام المصداقيه، إلى متى ؟؟؟؟؟؟	Negative	STC
@f_a_a4964 @engfaisalabdul @STC_KSA والمصيبه لما تكلم خدمة العملاء يقولون لك احنا مالنا دخل روح لتويتر وقدم شكوتك،، نتمنى احد يتجاوب معانا!!	Negative	STC
@F_Himedi @STCcare لا باس جيدين لازم عندهم عاده شهريه يوم يجلطونك فيه او نص يوم	Negative	STC
@F3li__ @STCcare خليهم يولون قسم بلله مخيسين	Negative	STC
@F3li__ @STCcare انا حولت احس كنت في ظلال 💀	Negative	STC
@F3li__ @STCcare حسبي الله نفس المشكله عندي 🙃💔	Negative	STC
@faisalalshaari @STC_KSA الحل سهل جدا جدا... راجع الإدارة الهندسية 😂	Negative	STC
@faisalfahd18 @STC_KSA @OceanBasketKSA اسراف	Negative	STC
@Fantastic_07_ @STCcare لا تجدد خذ زين كذابين عندهم استخدام عادل يبونك تدفع بس اسحب عليهم	Negative	STC
@Faris_Hil سوا لكم اعلان اعطوه 3 اشهر نت مفتوح @STCcare	Negative	STC
@fasil2480 @STC_KSA والله ماكلاها الا أشخاص ينعدون على الاصابع ٢٦ مليون ل خمسة أشخاص سنويا والموظفين هم الضحايا ولكن حسبنا الله ونعم الوكيل	Negative	STC
@FayzGarni @STCcare ههههههههههههههههههههههههههههه نبي الالياف بس	Positive	STC
@Fi9alov @STC_KSA اجلدوه وعطوني جائزه لو سمحتوا	Negative	STC
@Fix9aL @STC_KSA امين الله لا يربحكم	Negative	STC
@ghamdi9099 @STCcare @Eng_m22 ردوا على الرجال دافع لكم فلوس ماهيب نهيبه الشغله	Negative	STC
@GIVENCHY_1412 @1sarahN @STC_KSA للاسف مقفله وكلمتهم قالو ماعندك خدمه مشغله	Negative	STC
@Hamdon10 @STC_KSA ما عطوك الا STC !هههههههههههههههههههههههههههههههههههههههههههههههههههههههههههههههههههههههههههههههههه .	Negative	STC
@HAMED__TH @Mobily1100 @STCcare خذلك stc اصرف لك	Positive	STC
@Hamedaloraini @STCcare الله يعينكم على دفع50ريال وتغيير الشريحة…وضع الشرائح حقاتهم غريب،تخرب فجأة وهي داخل الجهاز!! ودي اقول انها بفعل فاعل	Negative	STC
@HaniALSALEM @STC_KSA اذا اعلنت شركة الاتصالات افلاسها رسميا ..واستغنت عن كل موظفينها ..وشفتهم بالشوارع داجين .. اعطيك عن كل ريال اربعة	Negative	STC
@HaniALSALEM @STC_KSA عندي صفر مير مافي شبكة هير شر لا نت ولا اتصال .. جعلهم يفلسون عاجلا وليس اجلا يارب	Negative	STC
@HaniALSALEM @STC_KSA ماعليك نبيع لك بكرة ماركت وهم يفلسون وانا اعوضك بالفرق ماعليك بس يفلسون ويتشرد موظفينهم بالشوارع لا راتب ولا وظيفة	Negative	STC
@hemsh8 @STCcare شوووووفوا حسبي الله عليكم 💔شبكه خزان الاحزان 😂😂😂😂😂😂😂😂🏃🏃🏃	Negative	STC
@HM843 @STC_KSA والله انك صادق الشبكه زفت	Negative	STC
@Hussam_shammaa @Mobily @Mobily1100 @STC_KSA الغريب ... النصب عيني عينك وبكل وقاحة يقولك انت استهلكت النتطيب ياذكي انا اساسا مو مشغل نت	Negative	STC
@ibhm @STC_KSA هل هذا احد الاسباب ان نت البيت من STC صاير سيء جداً ويفصل كل دقيقتين ؟	Negative	STC
@ibhm @STC_KSA راضين بالجيل الثالث بالرياض والي حوليها مرة راضين الخامس موب كفوهم	Negative	STC
@ibhm @STC_KSA شريحة البيانات بعدنا نشغلها على 3G 😑الفور جي تقطع وتعلق	Negative	STC
@ibhm @STC_KSA طرح جميل و خطة طموح تعطي ميزة تنافسية للشركة.	Positive	STC
@ibhm @STC_KSA في السوالف كلنا نقدر نسولف ، لكن الواقع !! مافي شي ، شريحته خاصة وفيها كل المميزات وما يدري عن البقية	Negative	STC
@ibhm @STC_KSA كززاااااب وسته وستين كززاااااب💩	Negative	STC
@ibhm @STC_KSA مافيه دوله بالعالم يجيها المبالغ الي تجي stc	Negative	STC
@ibhm @STC_KSA يقصد في حارتهم الفور جي عندنا ما يشتغل	Negative	STC
@ibhm الحين دول برّا، دراستهم و تنقلهم واكلهم وشغلهم وطقطقتهم ونت مجاني بالشوارع اقل منّا، وبالاخير حنا نطلع المو طبيعيين! :)!@STC_KSA	Negative	STC
@ibrg_ علما ان سرعتك بالعصر الحالي تعتبر متوسطة الا اذا كنت عميل للحبايبفي @STC_KSA https://t.co/tCbyzWdS4R	Positive	STC
@ifawazsv @STC_KSA مأخذ عقلي ال م رسيد س عرض stc.. ماعلينا اشكرك واذا عندك معلومه تفيد زودنا فيها	Positive	STC
@iii24_ @STC_KSA مالقيتم تبطؤون النت الا عند خوخة حسبي الله عليكم 💔	Negative	STC
@iLatura @STC_KSA ارفع قضيه	Negative	STC
@iLatura @ZainKSA الله يلعن stc	Negative	STC
@iLatura @ZainKSA المشكلة التغطية بالزاهر ابو كلب ياخي ابنوا برج جمب بيتنا في ارض فاضية	Negative	STC
@iLatura @ZainKSA حبايبي زين ❤️❤️❤️❤️❤️❤️صدقني لن تندم	Negative	STC
@iLatura @ZainKSA والله افضل من موبايلي واس تي سي بمراحللل وعن تجريه	Negative	STC
@iMaram_NFC @pumba_11 @ZainKSA وانا بعد شريحتي زين وانتي ماتقصرين 😉	Negative	STC
@imesha_k0 @STCcare 👆 نفس المشكله !!!	Negative	STC
@iranianaffairs لم يهاجم السعوديه ..هاجم الشركه النصابه @STC_KSA وهو صادق أصلا شركه زباااله ومحتاله	Negative	STC
@iRayan_M @Updula @STC_KSA @OceanBasketKSA اتوقع الجايزه كان سعرها اكثر من كذا ، بس عوامل التعريه من مكتب لمكتب وصلتها ١٠٠	Negative	STC
@jjamalmas123 @MALHACHIMI @fooooz_7 أتوني والا ذهبت لهم مهرول كلنا نعرف ان #stc حراميه	Negative	STC
@jjamalmas123 @MALHACHIMI @fooooz_7 بل الله حفظه من اموال #stc فهي اموال حرام سُرقت منا في وضح النهار	Negative	STC
@kalmashari @abonayf_2013 @STCcare الاتصالات السعودية فعلا تواجهة مشكلة خطيرة في الفوترة والمالية بشكل يجعلنا نشك في شبهة fraud	Negative	STC
@kdahman3 @STCcare وازعجتنا كل يوم، فليبر ومدري شنو، يا عمي يازين الدايل اب 😂💔💔💔	Negative	STC
@Khaled_Biyari @CITC_withU @STCcare ياخالد البياري اش الحل بالله ثلاث سنوات وانا اقلك حي الفلاح ثلاثه بدون برج ولاكيابل	Negative	STC
@Khaled_Biyari @STCcare إغلق البلاغ مرتين و قمنا بإعادة فتحة.. الفني زار المواقع وقال البرج يحتاج صيانه@CITC_SA https://t.co/SaaN8SnQRe	Negative	STC
@khalidalshaban @STC_KSA @STCcare @AlsharqiyaCafe ههههههههههههههههههه خلهم ينفعونك دامهم يعجبونك	Negative	STC
@kxliv @STC_KSA ياختي ولا المودم حقهم الجديد كويس 👍مادري هو جديد ولا قديم بس اللي اعرفه انه فخممم	Positive	STC
@Law_traflgar @Bc3tr @STCcare ولا موظفينها يكلمونك من طرف خشومهم تقل ابلاش الخدمة الله لا يوفقهم من شركة	Negative	STC
@llizr_ @tfrabiah @SaudiMCI @STC_KSA @SouqKSA سيتم بكل تأكيد التواصل معكم لحل شكواكم بأقرب وقت	Positive	STC
@Lomxar @Mobily @Alhilal_FC @STC_KSA من اليوم و رايح بركب نت اس تي سي شكله افضل حتى الهلاليين حطوه	Positive	STC
@maha979 @STC_KSA STC 💛💙 ، بس ترا النت ضعيف عندي	Negative	STC
@MALHACHIMI والله يادكتور #stc سرقتنا انا شخصياً دفعت ١٤٠٠٠ ريال قيمة ٤ شرائح وغيري دفع ١٠٠٠٠ ريال للشريحة الواحد التي خفضت لاحقاً ٥٠٠٠ ريال	Negative	STC
@MayM91 @ibhm @STC_KSA غير صحيح ..الالياف البصريه من ركبتها ماقطعت معي ولا مره	Positive	STC
@medshl @STC_KSA كان بينك وبين الاتحاد ١٥نقطه الان معادلك في النقاط	Negative	STC
@MeeD25 فعلاحصل عندي ذالك قال فني اذا لايوجد الياف بصريه تصل السرعه 8أعلي حد لذي الغيت الخدمه #stc للاسف كل الذنوب تصل حساب الموظف وبعدين!	Negative	STC
@MeeD25 هم كذا نصابين اذا ما وصلت الالياف البصريه لاتدوري اكثر من 8 قيقا سرعه لكن الشريحه ارخص واسرع شوفي شركة زين جيده الان #stc	Negative	STC
@mesh3l_en @STCcare مخيسين وبس الا يرفعوا الضغط	Negative	STC
@mesh3l_en @STCcare والله شكلي بحول وش ذا نتهم خياس طول اليوم	Negative	STC
@mH_mJzo3 @STCcare كلاب يارجل 😂	Negative	STC
@mH_mJzo3 @STCcare ليه ماتجاوب ؟؟	Negative	STC
@mH_mJzo3 @STCcare مافيه مشكلة ' نجلدهم جلد	Negative	STC
@mH_mJzo3 @STCcare يقدر يرفع قضية عليكم ؟ جاوبو ياملاعين ' انا راح ارفع قضية ايضاً	Negative	STC
@mH_mJzo3 على زق @STCcare	Negative	STC
@mh053169 والله حتى تفلاتنا خساره فيهم #stc	Negative	STC
@milyani @STCcare @STC_KSA يمكن الي عندك آلة زمن مب موديوم .. عدل التاريخ الى المستقبل 😂😂😂	Negative	STC
@MIsuwaiel @Khaled_Biyari @CITC_withU @STCcareاسالكم بالله ياناس في سرعة نت في العالم صفر هذي سرعة النت عند اس تي سي ومافي احد يحاسبهم	Negative	STC
@MIsuwaiel @Khaled_Biyari @CITC_withU @STCcareاش اللحلل بالله ليش مطنشين	Negative	STC
@MIsuwaiel @Khaled_Biyari @CITC_withU @STCcareسعادة وزير الاتصالاتت انا الان ببخش السنه االثالثه وههيئة الاتصالات ماردت	Negative	STC
@MIsuwaiel @Khaled_Biyari @CITC_withU @STCcareشوف كم تغريده ومايردو بالله اش وضعهم معقول مافي احد يحاسبهم	Negative	STC
@MIsuwaiel @Khaled_Biyari @CITC_withU @STCcareشوف يامعالي الوزير اكلمهم ومطنشين ومايردو وحاطين برنامج الرد الالي	Negative	STC
@MIsuwaiel @Khaled_Biyari @CITC_withU @STCcareشوفو كم تغريده ولاحد يرد	Negative	STC
@MIsuwaiel @Khaled_Biyari @CITC_withU @STCcareمعاللي الوزير انا لي ثلاث سنواات وانا اقلك حي الفلاح بدون نت وسعادتكم ماتردو اش الحل	Negative	STC
@MIsuwaiel @Khaled_Biyari @CITC_withU @STCcareمعقول خدمة العملا تطنننننننننننننننننننننننننش	Negative	STC
@MIsuwaiel @Khaled_Biyari @CITC_withU @STCcareهههههههههههههه شكلكم كلكم مطنشين	Negative	STC
@MIsuwaiel @Khaled_Biyari @CITC_withU @STCcareوالله مايصير التطنيش	Negative	STC
@MIsuwaiel @Khaled_Biyari @CITC_withU @STCcareياجماعه اش الحل السرعه صفر ومافي نت	Negative	STC
@MIsuwaiel @Khaled_Biyari @CITC_withU @STCcareياجماعه والله مايصير	Negative	STC
@MIsuwaiel @Khaled_Biyari @CITC_withU @STCcareيالله اش الحل ياناس لارد ولاحل ولاشي	Negative	STC
@MIsuwaiel @Khaled_Biyari @CITC_withU @STCcareيامعالي الوزير اشتكيت شركة الاتصالات السعوديه قبل ثلاث سنوات وللحين ماصارشي	Negative	STC
@MIsuwaiel @Khaled_Biyari @CITC_withU @STCcareيامعالي الوزير اشتكيت لهم مانفع اشتكيت لهيئة الاتصالات مانفع اشتكيتلك ماترد اش الحل بالله	Negative	STC
@MIsuwaiel @Khaled_Biyari @CITC_withU @STCcareيامعالي الوزير لوسمحت طلبي بسيط لايصلحو البرج بس يردو	Negative	STC
@MIsuwaiel @Khaled_Biyari @CITC_withU @STCcareيامعالي الوزير ليش الاحياء الراقيه تركبولهم ككيابل واحسن ابراج وافضل خدمه واحنا ولاشي	Negative	STC
@MIsuwaiel @Khaled_Biyari @CITC_withU @STCcareياناس اقل شي نشطو الشريحه او صلحو البرج الخربان ثلاث سنوات تدرسو تصليح البرج	Negative	STC
@MIsuwaiel @Khaled_Biyari @CITC_withU @STCcareياوزير الاتصالات شوف حاطك في نفس الرابط ومطنشين	Negative	STC
@mkreazem @aum_md @STC_KSA يعطيك العافية	Positive	STC
@mod6rb @STC_KSA @STCcare شقق الاغنياء فيها فايبر 😒	Negative	STC
@MohammdAldweesh @STCcare طال عمرك له اكثر من سنه راكب رقم الكبينه على باب بيتي وكل مااكلم احد يرميني على الثاني من رقم الى رقم وبالاخيرلاشئ	Negative	STC
@MohammdAldweesh @STCcare للاسف مافي حل وتشتكي عليهم هيئة الاتصالات داجين مثلهم مع العلم اني اشتكيت والى يومك مافي فايده	Negative	STC
@MohammdAldweesh @STCcare ما بعد وصلني الالياف شكلي بركبها في بيتي بعد 10 سنين	Negative	STC
@MohammdAldweesh @STCcare والعذر الاقبح من ذنب يقولك ما تعرفت الكبينه لهم اكثر من سنه مركبينها والى يومك ما عرفوها لا وكل هذا دي اس ال	Negative	STC
@MohammdAldweesh @STCcare يقولك رح راجع مبنى 37 ورح ترجى فلان وعلان عشان يركبونها لك	Negative	STC
@Mohmmad_al3ni @STC_KSA 😂فديتك انا كل شي منك مقبول يالشيخ	Positive	STC
@moosa_099 @STC_KSA الله ياخذهم وين الرحه	Negative	STC
@mr_abdualaziz1 احمد ربك لو جيت عندي بتضحك برج واحد لا و 3g #stc	Negative	STC
@mr_basem999 @STC_KSA @STCcare آمين ، وانا كذلك عندي إنترنت شريحة بيانات النت فيها ضعيف لو ابتعد 30 متر تقريباً تفصل الشبكة.	Negative	STC
@mr_basem999 @STC_KSA @STCcare حريصين على أخذ حقوقهم قبل خدمة العميل، أول مرة اشوف شركة تأخذ المقابل قبل خدمتك.	Negative	STC
@mr07ksa @STC_KSA @MeshoRs @rasas40 شفته والله انه احسن منهم	Negative	STC
@mr07ksa @STC_KSA يعطيك العافية اخوي	Positive	STC
@msaad1433 @STC_KSA عطلان سنة كاملة #هل_كيف 😂	Negative	STC
@msaedga12345 @STC_KSA لنك طحلبي الأنترنت ضعيف عندك 🐊🐊🐸🐸	Negative	STC
@naser3994 @992_56 @aum_md @STC_KSA يعوض أبشر وقت ماترجع الخدمة تواصل معي	Positive	STC
@naser3994 @mkreazem @aum_md @STC_KSA مانبي منهم شي بس ترجع الخدمه فقط ...	Negative	STC
@nassr_011 @STC_KSA احسن من ترتيبي السابع هل تسمعني جيدا	Negative	STC
@nnhh211 @STC_KSA ديدنهم وعندما تفرح بنهاية مسلسلهم بتسوية الفواتير فاذا بك بعد كل شكوى يعطى لك رقم جديد لنفس الشكوى التي قدمتها منذ ربع قرن	Negative	STC
@Nofa_4n @STC_KSA ايش نسوي خليها ع الله	Negative	STC
@None_552 @STC_KSA انسي ما اتوقع يردون عليك مالك الا الصبر ☺	Negative	STC
@None_552 @STC_KSA خليهم يصلحون نتهم الخايس بعدين يفكرون يردون عليك ☺☺	Negative	STC
@o_s3ood_o @STC_KSA هددهم انك بترو موبايلي	Negative	STC
@ON0_OF @Faisal_AlSaber @STCcare وبعد حي التسهيلات الشبكة زفت	Negative	STC
@ops4o @STC_KSA مدري وين عقولنا وحنا مخلينهم يشفطون دراهمنا ع الفاضي💔	Negative	STC
@ops4o @STC_KSA وربي غثى بإذن الله نشطب عليهم	Negative	STC
@soosoo21212 @STC_KSA اذا بسبب النت حرام عليك ، نتهم ممتاز جداً	Positive	STC
@soosoo21212 @STC_KSA حلقه Gotham نزلتها ب ٦ ساعات 💔	Negative	STC
@soosoo21212 @STC_KSA شكراً stc 😂🏃🏻	Positive	STC
@soosoo21212 @STC_KSA كلش ولا سوما ياشركة الظراااط	Negative	STC
@soosoo21212 @STC_KSA لاتقلقين.. عندهم قسم خاص للتعويضات!!! 😂😁	Negative	STC
@soosoo21212 @STC_KSA من الليل وانا اعاني منهم 😭	Negative	STC
@soosoo21212 @STC_KSA وانا ان جاني فتاق بسبب شوارع ksa المخيسه اضف اليها روائح مدينتنا الجميله اللي صدعت برؤوسنا	Negative	STC
@ssaleh09 @ZainKSA شركة فاشلة من الصبح نحاول معهم ومافيه فائدة وحتى موظفيهم موعارفين الطريقة	Negative	STC
@STC_KSA Stc لاتصدق بعروضها	Negative	STC
@STC_KSA إخواني الكرام مسؤولي شركة STCهناك مخالفات في قيادة سيارات الشركتكممثل هذا المتهور الأرعن أ م ل 4146كاد ان يسبب حوادث متعمدا	Negative	STC
@STC_KSA الرجاء اعطاء دورات لموظفينكم في فرع شارع فلسطين في التعامل مع الجمهور شكرا لكم تقبلوا انتقادي لانني اراكم الافضل	Positive	STC
@STC_KSA ديدنهم وعندما تفرح بنهاية مسلسلهم بتسوية الفواتير فاذا بك بعد كل شكوى يعطى لك رقم جديد لنفس الشكوى التي قدمتها منذ ربع قرن	Negative	STC
@STC_KSA @STCcare ام ان كثرة المشاكل والأعطال في خدماتكم لا يجد الفني الوقت الذي يستطيع حل مشاكلنا المعلقة	Negative	STC
@STC_KSA @STCcare راضين عن نفسكم؟ و أدائكم الوظيفي ؟ صدق راضين؟؟؟!!!!	Negative	STC
@STC_KSA @STCcare طبيعي تلتزمون الصمت اذا الخطأ من قبلكم لكن لو الخطأ من العميل لن تتركوا اي طريقة حتى تصلوا لمبتغاكم @CITC_SA	Negative	STC
@STC_KSA @STCcare @YouTube انا مشتركك في باقه لامحدوده مفتوح وسرعة النت زي الزفت ياخي عيب عليكم خافوا ربكم!!!!!	Negative	STC
@STC_KSA @STCcare يعني انتو هيك بتحكو انو احنا شركة تعاريص ! استغفر الله العظيم ... https://t.co/lWVcdCe2Bl	Negative	STC
@STC_KSA اتصال وماتردون وهنا بعد ماتردون لو سمحت رد	Negative	STC
@STC_KSA اخوي عندي شريحه بيانات وجتني مشكله يقول لي لاتوجد خدمه او مافيه شبكه وكان كويس وفجئه جتني ذي المشكله	Negative	STC
@STC_KSA الانترنت مقطوع ارجوا ان يتم تعويضنا عن هذا القطع المتسببه به شركتكم واتمنى ايضاح السبب في اقرب وقت ممكن	Negative	STC
@STC_KSA الحين اذا جوالي مقطوع النت ينقطع معه سوال ذكي صح ؟	Negative	STC
@STC_KSA السلام عليكم انا مشترك في افضل باقه ٤٠٠ ريال نت مفتوح مقطع وتساب ياله يفتح شوفو حل	Negative	STC
@STC_KSA السلام عليكماخوي انا انفصل عندي كويك نت المنزلي G4 وتم ارسال رقم السداد على جوالي وبعد السداد اتضح لي ان الرقم المرسل لي خطا ؟؟	Negative	STC
@STC_KSA الله يبارك فيكم	Positive	STC
@STC_KSA انتوا نصابين وبقووووه تقول عرض *888# قيمه العرض 19 ريال اتصال الى اليمن 25 دقيقه بدون العرض اتصل الى اليمن بـ19 ريال 26 دقيقه	Negative	STC
@STC_KSA اول شي عدلو النت وخدمات للجوال وبعدين اطلقو نت بطي	Negative	STC
@STC_KSA آيه وآلله فكونآء من آبتكآرتكمً آللي جآبة المرض وضبطو شبكتم قآل آلآليآف بصرية 🌚	Negative	STC
@STC_KSA بصراحة شركتنا اخطأت خطأ فادح بالتعاقد معكم من افشل شركات الاتصال يعني نتصل عشان احد يرد علينا مافي الا رد الي	Negative	STC
@STC_KSA حسبي الله عليكم	Negative	STC
@STC_KSA رقم البرج zfh 190 يعمل على مولد مزعج اتمنى تشوفن له حل	Negative	STC
@STC_KSA طيب ممكن تزينون نتكم عشان اراعي المباراة 😢	Negative	STC
@STC_KSA قدمتُ بلاغا لتكرر أعطال النت، فاتصل المندوب قبل قليل الساعة ١٢ ليلا! ويدعى عبدالمحسن. وقال: ترد الآن أو أغلق الطلب!! شكرًا stc	Negative	STC
@STC_KSA كلهم سنافر	Negative	STC
@STC_KSA لوسمحت انا اليوم شحنت شريحة البيانات شبكة الا محدوده ب٣٠٠ريال اعادةشحن والى الان ماتشتغل معي واتصلت ع ٩٠٠ وما تفعلت معي وش المشكله	Negative	STC
@STC_KSA ما يحتاج ادخل في السحب المجاني .. اختصر على نفسي وسحبت عليكم .	Negative	STC
@STC_KSA ماشالله عليكم نتكم مرررره بطييييئ	Negative	STC
@STC_KSA ماهو السبب التطبيق مايشتغل https://t.co/ksTdTnxpHK	Negative	STC
@STC_KSA ممكن أعرف متا نتكم بيتعدل :) ؟	Negative	STC
@STC_KSA والله لو انا لوحدي اشتركت ما افوز حظي واعرفه😊💔	Negative	STC
@STC_KSA وشلون يتربطون والسرعه نص ميقا خخخخخ #نكته #السعوديه #الهلال #نص_ميقا_stc خخخهخخخههخهههههه	Negative	STC
@STC_KSA @ موبايلي سلمت سيارة لامبورقيني لشخص وانتو تقولو قسيمة ب ١٠٠ 😂😂😂💔👊🏼	Negative	STC
@STC_KSA @Algoohr10Talal مايفتح موقع الجوال نت 😰 ابي افعل ٣ شهور ٥٠٠	Negative	STC
@STC_KSA @dddrf3 ياخي رداوول	Negative	STC
@STC_KSA @fahad99 @YouTube بيض	Negative	STC
@STC_KSA @fahad99 إلا ماسمعتوا عن تردي خدمات شبكتكم وخاصة ابراج الجوال حتى باتت مقاربة للصفر	Negative	STC
@STC_KSA @fahad99 سامعين فيها من قبل ما تتأسس حتى https://t.co/XjP1D0CvyJ	Negative	STC
@STC_KSA @fahad99 ماسمعنا ولا يهمنا نسمع المهم اللي شايفينه من خدمة النت السئ عندكم 😡	Negative	STC
@STC_KSA @fahad99 وشفنا منكم سوء انت	Negative	STC
@STC_KSA @fisil_aziz @STCcare فريق سرقة العملاء اجل تطالبوني بسداد رسوم شبكة وانا مسدد وفاصل الرقم واتفاجئ بصدور فاتورة بعد سنة كامله	Negative	STC
@STC_KSA @flyincom @tntmooz مبروك ولكن يا اخوان في فلاي ان اذا تبي تنجحون ابعدو عن الاتصالات السعودية ما احد يشاركهم بشي ويربح شركة مدحدرة	Negative	STC
@STC_KSA @flyincom الله يبارك فيكم ❤️	Positive	STC
@STC_KSA @hamood1w انا من الناس اللي بلغت عن مشكلة صارت لي ولم يتم حل مشكلتي اسوء شركة شفتها في حياتي	Negative	STC
@STC_KSA @HaniALSALEM من زينكم وخدماتكم اللي تفشل	Negative	STC
@STC_KSA @k_kk2013 الف مبرووووك ياخالد	Positive	STC
@STC_KSA @k_kk2013 ألف مبروووووك	Positive	STC
@STC_KSA @k_kk2013 حسابه كله مشارك في مسابقات	Negative	STC
@STC_KSA @k_kk2013 طيب وانا العبد الفقير لله ما بتربحونا شي؟مبروك خالد هههه	Negative	STC
@STC_KSA @k_kk2013 مبرووك،، انتبه لا تسطحها عند الجيران	Negative	STC
@STC_KSA @k_kk2013 مجاملات	Negative	STC
@STC_KSA @k_kk2013 وانا وشقوم مافوزتوني 😎	Negative	STC
@slimsargenttttt @khalidalshaban @STC_KSA @STCcare @AlsharqiyaCafe الرجال من امس ماغرد ولا رسل لنا واتس ولا سناب ضبطوا النت عنده ، وحشنا	Negative	STC
@sha_sha650 @MALHACHIMI ممكن تشرح لنا كيف يخسر الدكتور الهاشمي محبيه بسبب تغريدة تتناول حقيقة موضوعية حول #mbc و #stc .؟	Negative	STC
@SaudiMCI عقود شركة الاتصالات #stc فيها غش وكذب ع العميل	Negative	STC
@samii550 @STC_KSA اي الله يسعدك	Positive	STC
@SarahAlowidah @STCcare مايستحون 😒	Negative	STC
@SalimAlhazza @STC_KSA الله يسعدك تمام	Positive	STC
@saidalqahtaani @al3lobeee @STC_KSA نعم وخدمتهم رائعه لاكن stcويدل عليك اول حرفين من اسم الشركة 😂😂😂👍	Positive	STC
@sabelaklaf6669 @STC_KSA وراح تبطئ وهى اسوء شركه ..	Negative	STC
@saeedbamatraf @STC_KSA طبعا ماسحبوا علي STC وجاوبوني على طول ترا 😁	Negative	STC
@saadalhisin101 @STCcare نفس المشكله حسبي الله عليهم	Negative	STC
@saaad_2005 @STCcare التميز النت من STCللاسف ظعيف ضروري يشوفو حل لمشكلت الانترنت	Negative	STC
@ronaahmad1417 @STCcare تمام التمام يعطيك العافية	Positive	STC
@roozme2009 @STC_KSA لا تغيري هم أحسن السيئين	Negative	STC
@roozme2009 @STC_KSA مافي أمل يتطورون من حالهملازم شكوى واتصال وارسال موقع	Negative	STC
@rocka911 @Mobily والله ياخي شركات الاتصالات والمشغلين كلهم على غير المأمول منهم … ولكن لعل وعسى شوية مصداقية	Negative	STC
@Rawan_But @STC_KSA @ASHRM2016 ماجتنا انفتيشن :(	Negative	STC
@r20014a #stc والزق	Negative	STC
@r2ttn @Mobily @Alhilal_FC @STC_KSA شكل يبيلها مقاطعة موبابلي	Negative	STC
@Ranax_x @STC_KSA @OceanBasketKSA يافضحي فضحاااه https://t.co/QiE1LH5Vy3	Negative	STC
@STC_KSA @MeshoRs @rasas40 انا ليه ما فزت؟ عشان ما اشتركت بس؟ ياخي انما الاعمال بالنيات والنيه اني اشترك 😒	Negative	STC
@STC_KSA @MeshoRs @rasas40 جوائز اكثر يا النصابين وأنتم كل ما شحنت سحبتوه الله حسيبكم	Negative	STC
@STC_KSA @MeshoRs @rasas40 حسبنا الله ونعم الوكيل	Negative	STC
@STC_KSA @MeshoRs @rasas40 خدمة العملاء لا ترد على العملاء...؟!	Negative	STC
@STC_KSA @MeshoRs @rasas40 مبروك	Positive	STC
@STC_KSA @MeshoRs @rasas40مبروك عليكم وعقبالي😍	Positive	STC
@STC_KSA @Moohamad88082 لا تتعبون نفسكم لا موظفين يستجيبون للمشاكل وخدمه سيئه هدفهم اخذ ما في جيوبكم	Negative	STC
@STC_KSA @nory_alHrbi النت متوقف عن المنزل من يومين	Negative	STC
@STC_KSA @nory_alHrbi النت متوقف عن العمل منذ يومين	Negative	STC
@STC_KSA @nory_alHrbi النت مقطوع له يومين ، ولم يكن هناك تنبيه بالانقطاع في المقسم كما تقولون والمشكلة أننا ندفع الفاتورة كاملة ، حسبنا الله	Negative	STC
@STC_KSA @nory_alHrbi ي عمي بلا كذبانا بيني وبين الشركة الأم 30 متر والنت زي الزفتوكل مانبلغ مانلاقي حل حسبي الله ونعم الوكيل فيكم يا#stc	Negative	STC
@STC_KSA @OceanBasketKSA اخوي ماتستاهل عليك الشحططه والتصوير مع قسيمه شرائيه ب100ريال 😂😂	Negative	STC
@STC_KSA @OceanBasketKSA الله يفشلكم 100 ريال اقل مافيها 100 الف ريال قيمة دخل ثانية عندكم	Negative	STC
@STC_KSA @OceanBasketKSA بمية ريال ومتصورين معه بعد	Negative	STC
@STC_KSA @OceanBasketKSA حسبتها 100 الف ):	Negative	STC
@STC_KSA @OceanBasketKSA شركه. ش كبرها والهديه 100ريال بس ولا كمان تتصورون معه شركه فاشله	Negative	STC
@STC_KSA @OceanBasketKSA شكل الرقم فيه خطأ يمكن ناقص صفرين 😁	Negative	STC
@STC_KSA @OceanBasketKSA على بالي 100الف 🌵	Negative	STC
@STC_KSA @OceanBasketKSA 😂😂😂😂 والله فضيحه هالجوائز	Negative	STC
@STC_KSA @OceanBasketKSA 100 بس والله لو انكم تصدقون على العملاء ؟؟؟؟؟؟؟؟😱😑	Negative	STC
@STC_KSA @OceanBasketKSA 100 ريال بس وش هل حركات أجل انا اذا كسبت وش بتطوير حلو أبو نص والله شركة مسخره كل هل هيلامه الاعلانية و100 ريال	Negative	STC
@STC_KSA @OceanBasketKSA ١٠٠ ريال دعايات لشركه زي ال Stc لو كلمتونا نقط لكم؟ أصلاً انتوا اخذين مني مبالغ مسبقه بغير وجه حق اعتبروها قطه	Negative	STC
@STC_KSA @OceanBasketKSA 100 ريال عز الله احرجتو زين وموبايلي	Negative	STC
@STC_KSA @OceanBasketKSA ١٠٠ ريال ما تسوى طلعته لاستلام هالكوبون وتصويره ونشره، انا اقول خلوكم كرماء وزيدوه ٩٠٠	Negative	STC
@STC_KSA @OceanBasketKSA ١٠٠ ريال ماصارت شيء في هذا الوقت !!	Negative	STC
@STC_KSA @OceanBasketKSA 100 هذي انا لو عندي بقاله وسويت مسابقه حطيت الجايزه 100 اما شركة بحجمكم !! لا وفوقها ذالينه الا ياخذ من المطعم	Negative	STC
@STC_KSA @OceanBasketKSA ١٠٠ يارجل وفرحانين قيمة اللوحه والشخاميط اللي عليها تكلف اكثرمن جائزتكم عيب هالاستفغال للشعب اللي معيشكم بنعيم	Negative	STC
@STC_KSA @OceanBasketKSA ١٠٠ريال عسا ماتكلفتو	Negative	STC
@STC_KSA @OceanBasketKSA ١٠٠ريال وش بتجيب استحو على وجيهكم	Negative	STC
@STC_KSA @OceanBasketKSA اتركوا تيليجرام في حاله يا ملاعين	Negative	STC
@STC_KSA @OceanBasketKSA ارباح بالمليارات وتعطون جائزة ١٠٠ ريال وبالقرعة بعد فخمة الجائزة هذي اي شخص بسيط يعطيها لطفل طيب اعملوها بدون إعلام	Negative	STC
@STC_KSA @OceanBasketKSA استحوا على وجيهكم ميه ريال !!اللي يشوفكم يحسب مسلمينه سياره	Negative	STC
@STC_KSA @OceanBasketKSA اعتقد الكرت هذا كلّف ١٠٠ ريال!	Negative	STC
@STC_KSA @OceanBasketKSA اكبر نصابين وحراميه الله لا يباركلكم ولا فريال	Negative	STC
@STC_KSA @OceanBasketKSA الاتصالات الله يصبرنا عليك نتحمل ما عندنا الا انتي الله يصلحك شركه 😪	Negative	STC
@STC_KSA @OceanBasketKSA الحين يذلونه عشان ١٠٠	Negative	STC
@STC_KSA @OceanBasketKSA الزحمه ذي كلها واخرتها ١٠٠ ريال	Negative	STC
@STC_KSA @OceanBasketKSA السلام عليكم اعاني من ضعف شديد في النت مع العلم بان الباقة ثلاثة شهور 4G هل السبب من الراوتر او التغطية وشكراً	Negative	STC
@STC_KSA @OceanBasketKSA السلام عليكم عندي مشكله في الاتصال	Negative	STC
@STC_KSA @OceanBasketKSA الغريب انكم متصورين مع الفايئز.. و الفائز فرحان كمان.. والله شكله واحد من المكتب من عندكم	Negative	STC
@STC_KSA @OceanBasketKSA الكرت المصور كم تكلفتها مسوين زحمه على 100 ريال	Negative	STC
@STC_KSA @OceanBasketKSA الله لا يوفقكم ياشيخ كان الواحد تعلونه وتطلعون عيونه بكل خدمه منكم	Negative	STC
@STC_KSA @OceanBasketKSA الله لايشكر فضلكم علا ذا الجائزة	Negative	STC
@STC_KSA @OceanBasketKSA الله لايكثر خيركم	Negative	STC
@STC_KSA @OceanBasketKSA الله يفشلكم مية ريال. وبرامجكم برى بمئات الألوف.	Negative	STC
@STC_KSA @OceanBasketKSA الله يفقركم 100 ريال ماتسوى مدة اليد لكم	Negative	STC
@STC_KSA @OceanBasketKSA اللوحة كبيره بزيادة عالبالي ربح مليون ريال	Negative	STC
@STC_KSA @OceanBasketKSA اللوحه ذي قيمتها اكثر من الجايزه	Negative	STC
@STC_KSA @OceanBasketKSA المطعم غالي، ١٠٠ ريال ما تزبن عطوه زود 💵💵💵	Negative	STC
@STC_KSA @OceanBasketKSA الوحه الي شايلها قيمتها اكثر من الجائزه	Negative	STC
@STC_KSA @OceanBasketKSA اما ١٠٠ 😂 الصراحه بيحتار يشتري فيها مقبلات ولا بيبسي والباقي بخشيش !!	Negative	STC
@STC_KSA @OceanBasketKSA بالله كل ذي اللوحة عشان هدية ل100 ريال	Negative	STC
@STC_KSA @OceanBasketKSA بدل توزيع الجوائز على الناسكان من باب اولى سداد المقاولين مستخلصاتهمصار لي اربع شهور رافع مستخلص ولا شفت شي!!	Negative	STC
@STC_KSA @OceanBasketKSA بس 100 لا بارك الله فيكم	Negative	STC
@STC_KSA @OceanBasketKSA بصراحه ما قصرتوابس ليش كلفتوا على انفسكم50 تكفي ياخي ليش اللعب في الفلوس	Negative	STC
@STC_KSA @OceanBasketKSA بياخه قال 100 ريال	Negative	STC
@STC_KSA @OceanBasketKSA تاكلون ١٠ مليار وتعطون ١٠٠ ريال خوش ..لا وقسيمة شراء ب١٠٠ريال وتكلفة الوجبة مايتجاوز٢٥ ريال خوش شركه	Negative	STC
@STC_KSA @OceanBasketKSA ترا الصورة بايخة	Negative	STC
@STC_KSA @OceanBasketKSA تعلموا من الشركات الاماراتية والقطرية و كيف تقدم الجوائز و قيمة الجوائز اللي تليق بهم ، من اكبر شركات فالعالم	Negative	STC
@STC_KSA @OceanBasketKSA جائزة ماتستاهل . ذليتوا الرجال تصوير وفلاشات واخرتها مية ريال.	Negative	STC
@STC_KSA @OceanBasketKSA جوايزكم زي وجيهكم ليش ماتكون الجائزه خمس هللات	Negative	STC
@STC_KSA @OceanBasketKSA حطوها في الي انتو خابرينه١٠٠ريال وييين وش ذا الجائزة المخيسه	Negative	STC
@STC_KSA @OceanBasketKSA خربتوها ١٠٠ ريال يمال النجفه	Negative	STC
@STC_KSA @OceanBasketKSA شركة بالمليارات تقدم لعميل ١٠٠ ريال يخرب بيتكم ي شيخ	Negative	STC
@STC_KSA @OceanBasketKSA شركة كبرىتربح عشرات الملياراتوتحمل اسم الوطنوفيالأخيرتقدم جائزة100 ريالبصراحةإعلان مخجل	Negative	STC
@STC_KSA @OceanBasketKSA عام 2016 ولازالت الاتصالات ضعيفه تسويقيا انا استحي لو كنت مكانك امثلهم في هذه التفاهات 100 ريال عيب والله عيب	Negative	STC
@STC_KSA @OceanBasketKSA عساكم ماتعبتم وتكلفتم 100ريال	Negative	STC
@STC_KSA @OceanBasketKSA على هالصورة و الجدار اللي ماسكين أحسبه ربحان ١٠٠ الف و الله!	Negative	STC
@STC_KSA @OceanBasketKSA عندي مشكله في الاتصال من الجوال والنت	Negative	STC
@STC_KSA @OceanBasketKSA عيب شركة بحجم الاتصالات السعودية تكون قيمة جائزتها 100 ريال لو اني من الرجال رجعتها عليكم ... تصوير وزحمة عشان 100	Negative	STC
@STC_KSA @OceanBasketKSA فقط 100 ريال ومصورينه بعد !!!!! فكروا شوي	Negative	STC
@STC_KSA @OceanBasketKSA في دول العالم تقدم الشركات الكبرىخدمات اجتماعية وهداياتفوق الوصفعكسبعض شركاتنافهيلا تحترم عقولنا	Negative	STC
@STC_KSA @OceanBasketKSA قاعد ادور صفرين زياده مالقيت طلع من جد المبلغ ١٠٠ ريال كان وفرتوا حق اللوحه وخليتوا الجائزه ٢٠٠ ريال	Negative	STC
@STC_KSA @OceanBasketKSA قولت مع نفسي ياولد يمكن الف ريال هههههههه	Negative	STC
@STC_KSA @OceanBasketKSA قيمة اللوحه اغلى من الهديه..الله يفشلكم 😂	Negative	STC
@STC_KSA @OceanBasketKSA قيمة طباعة الكرت نصف مبلغ الجائزهيا فشيلتموه https://t.co/cucfEs9YWS	Negative	STC
@STC_KSA @OceanBasketKSA كان كلمتوني اعطيكم قطه الله يفشلكم😂😂😂😂😱	Negative	STC
@STC_KSA @OceanBasketKSA كتر خيركم🤐	Positive	STC
@STC_KSA @OceanBasketKSA كل هالتصوير علشان 100 ريال .. الله يصلحكم بس	Negative	STC
@STC_KSA @OceanBasketKSA كل هالزحمة واللوحه عشان ١٠٠ ريال استرجل يراجل توقعتها سيارة مو ١٠٠	Negative	STC
@STC_KSA @OceanBasketKSA كل هاللوحة علشان جائزة بمائة ريال . كان عطيتوه تكلفة اللوحة والدعاية . وصلوا الكيبل للمشتركين ونت بدون انقطاع وكفى.	Negative	STC
@STC_KSA @OceanBasketKSA كل هاللوحه الكبيره ونشرتو صور الرجال في الاخير ١٠٠ ريال	Negative	STC
@STC_KSA @OceanBasketKSA كل هالمليارات اللي تدخل عليكم وقسيمه الشراء ١٠٠ريال بالله ماتستحون على وجيهكم	Negative	STC
@STC_KSA @OceanBasketKSA كل هذا عشان مية ، يحسسوك انه رابح مليون ، لو عطوه ياها بالدس اصرف بدال الفضيحة هذي😂	Negative	STC
@STC_KSA @OceanBasketKSA لعنبوكم ماتستحون على وجيهكم اﻹتصاﻻت السعوديه ومسابقات وأخر شي بطاقه مئة ريال الله يجعلكم الفقرالصغير طول عمره صغير	Negative	STC
@STC_KSA @OceanBasketKSA لو اضافو قيمة الدعاية على ١٠٠ افضل ترفع من قدرهم اشوي.اتعبو المتسابق بالحضور لشركة stc	Negative	STC
@STC_KSA @OceanBasketKSA لو انا مكانه والله ما اطلع اتصور ع ١٠٠ استحي 🙈	Negative	STC
@STC_KSA @OceanBasketKSA مبسوطين ب١٠٠ بس ذي حقت بقاله	Negative	STC
@STC_KSA @OceanBasketKSA مسوين زحمه على 100 ريال وانتو تلهفون الملايين	Negative	STC
@STC_KSA @OceanBasketKSA من النظره الأولى توقعته ربح سيارة أو مبلغ مالي جامدلكن طلعت قسيمة شراء ب ١٠٠ ريال، ترى ماتسوى كل هالمذله🌝	Negative	STC
@STC_KSA @OceanBasketKSA مو كنها كثيرة ١٠٠ ريال تصوير و تغريد 😂😂😂😂	Negative	STC
@STC_KSA @OceanBasketKSA نعنبوا ابليسكم ميه بس 😑عسى ماهتزت ميزانيتكم😪	Negative	STC
@STC_KSA @OceanBasketKSA هالكبر واخرتها ميه	Negative	STC
@STC_KSA @OceanBasketKSA هذي الي ماسكينها بأيديكم تكلف فوق ١٠٠ ريال 😂	Negative	STC
@STC_KSA @OceanBasketKSA ههههههههههههه متقاطين أنتم والمطعم في الجائزة فضحكم الله	Negative	STC
@STC_KSA @OceanBasketKSA هههههههههههههههههههههههههههه تعبتو انفسكم بالهديه 😕💔	Negative	STC
@STC_KSA @OceanBasketKSA وااااو 100 ريااال :)ماتستحون تعلنون بعد .. هذه القيمة لو متدينها مني رفضت إرجاعها لا ومتصورين ومعلنين ...!!	Negative	STC
@STC_KSA @OceanBasketKSA واجده ١٠٠ ريال😂 ، توقعتها ١٠٠ الف 😚🙈	Negative	STC
@STC_KSA @OceanBasketKSA والله بدل هالتعب عطوه بطاقه شحن ب 100 ريال ابرك من هالفضيحه	Negative	STC
@STC_KSA @OceanBasketKSA والله ما تسواء	Negative	STC
@STC_KSA @OceanBasketKSA والله ماتستحون 100 بس ومسوين دعايه عليها	Negative	STC
@STC_KSA @OceanBasketKSA وتقدمون ١٠٠ ريال بعد ههههههه حسبنا الله عليكم	Negative	STC
@STC_KSA @OceanBasketKSA يبوي مية ريال ولا مية الف ذي ؟؟ متصورين عليها	Negative	STC
@STC_KSA @OceanBasketKSA يستاهل ه الزين اكثر	Positive	STC
@STC_KSA @OceanBasketKSA يوجه استح	Negative	STC
@STC_KSA @OceanBasketKSA 😂اش تسوي ١٠٠ ريال كم انتو مضحكين	Negative	STC
@STC_KSA @OceanBasketKSA 😂😂😂 اخرتها مئة ريال	Negative	STC
@STC_KSA @OceanBasketKSAتشهرون فيه عشان ١٠٠ ريال	Negative	STC
@STC_KSA @Raf_x25 @STCcare ابقى افهم يا STC!!! ايش يَـ۶نِيٌ هذا اقولكم كل دقيقة ينخصم مني مع اتي مقفله التطبيقات خلال ساعه تردون علي كذا؟!👇🏼	Negative	STC
@STC_KSA @Raf_x25 @STCcare أخذت جهاز الجلكسي نوت 5 الي عليه العرض ولاكن فرعكم رفض أن يعطيني النظارة الهدية الي جايه مع الجهاز عرضكم غش والا	Negative	STC
@STC_KSA @SAlrashaidi @STCcare حسبي الله ونعم الوكيل. النت جداً سئ. مفروض انتم بخدمه العملاء مو العميل يجري وراكم.	Negative	STC
@STC_KSA @SAlrashaidi @STCcare صبر جميل والله المستعان https://t.co/FnDqPzOjQp	Negative	STC
@STC_KSA @Sara_Fut اقول ضبط شبكتك لي كم احاول ادخل	Negative	STC
@STC_KSA @SaudiMCI مهزله والله رجال يخدم في قسم النساء	Negative	STC
@STC_KSA @STC_KSA مساءالخير أرجو معالجة البرج اللي عندنا لو سمحتو لان الشبكه من الصباح متعطله لم تعمل الا قبل عشر دقايق	Negative	STC
@STC_KSA @STCcare يعني يرضيكم اني اتابع مباراة فريقي على اضعف جودة وكمان يقطّع 😱😪😪 https://t.co/iBZJz3mwXz	Negative	STC
@STC_KSA @STCcare @AlsharqiyaCafe وترجع نفس المشكلة ضعف في الشبكة توصل الى حد مافي شبكة .. ممكن اعرف ليه تم ازالة السياره . ومن يعوضني الان	Negative	STC
@STC_KSA @STCcare @CITC_SA لي متى كذا ؟ بينكم مصلحه مع الواتساب ؟ او اتفاقيه فيها 💰💰 عشان تطيحون سوق التيليجرام ؟ https://t.co/ywtduKCNpb	Negative	STC
@STC_KSA @STCcare @STCBusiness الله ياخذكم اخذت عزيز مقتدر ياربي ياكريم تف عليكم انتم ونتكم الزباله🙂! https://t.co/yvZStKWNdq	Negative	STC
@STC_KSA @STCcare ارغب بالتواصل مع من اعطاني العرض ولم ينفذه	Negative	STC
@STC_KSA @STCcare أسأل الله أن ينتقم منكم وأن لا يسامحكم دنيا وآخره على سوء خدماتكم من شبكة إتصال وإنترنت وعدم تجاوب	Negative	STC
@STC_KSA @STCcare أسوأ خدمه واسوأ تعامل واسوأ شبكة.موظفكم يعاملنا كأننا نشحته يخدمناويقول مع السلامه مع السلامه واناماخلصت طلبيبئس الشركة	Negative	STC
@STC_KSA @STCcare أعيد وأكرر أسأل الله أن ينتقم منكم وأن لا يسامحكم دنيا وآخره على سوء خدماتكم من شبكة إتصال وإنترنت وعدم تجاوب	Negative	STC
@STC_KSA @STCcare افشل شركة اتصالات بالعالم ولا يهون عنهم @Mobily و @ZainKSA اذا لهم شي شرط تموت ويجونك لقبرك بس اذا لك حق مايدرون عنك👎🏻	Negative	STC
@STC_KSA @STCcare تنقطع الكهرباء وتنقطع خدمةالاتصال السيئةفي مركز الرين أليس هذا مخجل لشركةتصف نفسهابالعراقةوالعالمية؟؟!!؟؟!!!!؟؟	Negative	STC
@STC_KSA @STCcare رجاااااااء اغلقوا فرعكم في سوق حراء بجدة لان الفوضى تتكرر ولايوجد فيه اي نظام والمعاملة جدا سيئة من الموظفات	Negative	STC
@STC_KSA @STCcare كأن الواحد يشحدكم ترى تشتغلون بفلوسنا ولا نظامكم تصريف العملاء وفروعكم يصرفون وانتم هنا للتسليك وبعدها تقفلون الخاص 👎🏻	Negative	STC
@STC_KSA @STCcare كذب اكثر من كذاا ماشفت الحين يوم انكم تقولو ٣ شهور بـ ٣٠٠ نت مفتوح .. ليش تسحبوو ٢٥ زياده ؟حطوو ٣٢٥ وبلاشي لف ودوران	Negative	STC
@STC_KSA @STCcare لا مجيب	Negative	STC
@STC_KSA @STCcare لافايده منهم	Negative	STC
@STC_KSA @STCcare ياااااليت نلقى حل ملينا من كلمتكم رفعنا طلب رفعنا طلب	Negative	STC
@STC_KSA @STCcare يحلون المشكلة !!!كيف ستحل وردودكم مكررة وبلافائدة (نرجوا الانتظار)..يعني انقل من بيتي علشان تنقلون لي الخط!!!!	Negative	STC
@STC_KSA @STCcareعندي شريحة بيانات 4G و السرعة ما تتجاوز نص ميقا	Negative	STC
@STC_KSA @tntmooz @flyincom @STC_KSA مساءالخير أرجو معالجة البرج اللي عندنا لو سمحتو لان الشبكه من الصباح متعطله لم تعمل الا قبل عشر دقايق	Negative	STC
@STC_KSA @tntmooz @flyincom اصلا عادي انا سحبت على شركتكم ورحت لزين الحب 💘	Negative	STC
@STC_KSA @tntmooz @flyincom مبروك	Positive	STC
@STC_KSA @worries6 @STC_KSA مساءالخير أرجو معالجة البرج اللي عندنا لو سمحتو لان الشبكه تتعطل باستمرار	Negative	STC
@STC_KSA @worries6 نرجو معالجة وتلافي الأعطال	Negative	STC
@STC_KSA @YouTube @na591991 اشتركي واذا فزتي بيني وبينك السيارة 😁	Negative	STC
@STC_KSA @YouTube تقدمت قبل شهرين للحصول على بطاقة التميز وحتى الان لم تصدر	Negative	STC
@STC_KSA @YouTube صلحو النت المصدي قبل ماتعملو مسابقه الواحد يدفع ع الفاضي	Negative	STC
@STC_KSA @YouTube ماعمرنا سمعنا واحد فاز بسيكل	Negative	STC
@STC_KSA @YouTube هل هذا اسلوب تسويقي محترف ؟!	Negative	STC
@STC_KSA @ZainKSA انا اسف ي زين اني فكرت اسحب من نتكم وروح للملاعين اس تي سي راجع لكم والله راجع	Negative	STC
@STC_KSA 100 مليار يعني تبني دوله ثانيه اين ذهبت هذه المليارات وش استفادة الدوله منكم المفترض يخصص شي لدوله او على القل ابطالنا ع الحد	Negative	STC
@STC_KSA STC Care مالها اي نصيب من الاسم	Negative	STC
@STC_KSA stc اريد احول رقمي لموبايلي وstcفرع عرعر ماهم راضين ...وين المشكله .ولا يوجدعلي مديونبه...ساعدوني الى اي جهه اشتكي هالشركه	Negative	STC
@STC_KSA STCغير صادقه و الدليل لا يستطيعون تركيب علبة تلفون في حي جميع الخدمات متوفره وهذا يدل على ضعف و انعدام المسؤوليه من رؤساهم .	Negative	STC
@STC_KSA ابي ارفع اعتراض على الفاتوره حقت الهاتف عن طريق الايميل لاني مقدرت على الجوال لازم الهاتف والهاتف مقطوع	Negative	STC
@STC_KSA أتركو عنكم الأخبار الرياضية وغيرها وركزوا على شغلكم تراكم تقدمون لنا خدمة سيئة للأسف وكل الناس تشتكي من فروع الخدمة المنتشرة بالمدن	Negative	STC
@STC_KSA اتصلت بالرقم هذا يقول لايوجد لديك اشتراك حالياً	Negative	STC
@STC_KSA اتصلت على *٨٨٨# قلي اسري مافي عروض	Negative	STC
@STC_KSA اتمنى تشوفوا ايش المشكله شبكة الجوال و الدي اس ال مفصول ب الكامل لها اكثر من ساعتين في #الليث	Negative	STC
@STC_KSA احرقت ام الفلم يعني الرجال بيتأقلم مع المريخ ولا راح يموت يلا الحين كيف نشوف الفلم ابو من علمكم تسمون اعلانات	Negative	STC
@STC_KSA احس بشخخ من الخوف	Negative	STC
@STC_KSA احس نفسي بششخخ من الخوف	Negative	STC
@STC_KSA اخوي انا شريحة بيانات مفتوحة ولكن النت بطيء ممكن اعرف السبب .. مع العلم ان النت قبل كويس وماغيرت مكاني	Negative	STC
@STC_KSA أخوي موظف stc ليش مقاطعكم تشتغل بسرعه وأي مقطع ثاني يآخذ فتره علشان يشتغل 😊	Negative	STC
@STC_KSA اذا في طريقة نسويها وتغطو المنطقة بالفايبر نسويها اما بالطريقة هذي مو معقول حتا الكبينة الالكترونية ماتخدم منطقتنا	Negative	STC
@STC_KSA ارغب التحويل الى زين عندكم عروض او احول انا معاكم امثر من 25 سنه جوالي 0555867755	Negative	STC
@STC_KSA استبدلت نقاط قطاف برصيد ٩٠ ولم يتم التفعيل اتصلت عليهم اكثر من مره دون جدوى وهذه العروض استغلال وليس لديهم مصداقيه.	Negative	STC
@STC_KSA استلمتم رسوم الاشتراك كامله من العصر وهذا حقكم اما حقي كعميل فبعد اربعة ايام وسلسلة مراسلات على الخاص https://t.co/NkqbIAAdaS	Negative	STC
@STC_KSA اسلام عليكم نحنو سكان حي النظيم نعاني من ضعف الشبكة يعني نشتري شريحة اتصال مفتوح ولانقدرنفتخ قوقل حتي خرام نطالب بوصع برج في الحي	Negative	STC
@STC_KSA أسوء شركه في كل شي وش فيه النت كذا عندكم اتصال زفت مثل وجيهكم عندي نت بس اسم	Negative	STC
@STC_KSA اسوا شركه	Negative	STC
@STC_KSA اشبكم ما تردو	Negative	STC
@STC_KSA اشكروا نظامكم الذي اشركني في سبع باقات انترنت عندما طلبت واحدة فقط والآن تطالبوني بسداد قيمة السبع باقات	Negative	STC
@STC_KSA اصدار جهازي 7 وعيا يتحمل	Negative	STC
@STC_KSA اصلحو نظام الفواتير لديكم قبل عرض منتاجاتكم للعملاء أو ابلغوهم بأنكم سوف تسرقونهم	Negative	STC
@STC_KSA افضل شركة للتسليك .خدمة عملاء م يتجاوبون. الدعم الفني المفروض يسمى الدعم التسليكي. اجل افتح خلاف لمدة شهر بدون رد وانا صاحب حق	Negative	STC
@STC_KSA أقدم شركة اتصالاتلكن للأسف أسوء اتصالات	Negative	STC
@STC_KSA اقول اترك عنك المباريات واهتم بالعملاء من اسوء الشركات كا تعامل مع العملاء	Negative	STC
@STC_KSA اقول يعطون الناس أرقام مستخدمه على أساس أنها جديده👊👊👊	Negative	STC
@STC_KSA اكثر من ١٠ دفايق احمل هالاعلان ايه الثقل ياثقيل	Negative	STC
@STC_KSA الإتصالات السعوديةمن المستفيد من تقديم الخدمات السيئةومن المتضرر	Negative	STC
@STC_KSA الأخ العزيز لم يتم تركيب خدمة الإنترنت هل يعقل سنة؟	Negative	STC
@STC_KSA الانترنت بطي عندي والمشكله دائمه	Negative	STC
@STC_KSA الايام والساعات الي تنقطع فيها الخدمه عني وقد تم تحويل ثمن الخدمه لكم مسبقا من يعوضني بها ؟؟ اعمالي متعطله تماما ولكم الفضل في ذلك	Negative	STC
@STC_KSA الذئب لايهرول عبث عادتاً .من أنتم حتى تسلمكم الاتصالات هدايااو (ابنائها بتبني مثلاً)	Negative	STC
@STC_KSA السرعة عندي ١٠٠ وللاسف السديد ياسركة stc الاعطال والبطء في الانترنت عندي بشكل يومي بل يتكرر في اليوم اكثر من مرة ؟؟؟!!!	Negative	STC
@STC_KSA السلاام عليكم ي خي النت حقكم زفت داخل الحفر مره ضعيف	Negative	STC
@STC_KSA السلام عليكم ردو علي لي يومين اريد الدعم الفني ما احد معبرني	Negative	STC
@STC_KSA السلام عليكم #لقد تم رفع السرعه لدي بدون علمي وبالرغم من عدم دعم الكبينه لنفس السرعه المرفوعه وجددتوا العقد بدون علمي ! لماذا؟	Negative	STC
@STC_KSA السلام عليكم .. النت عندي من الصباح بطء او يطفي مره شسالفه ؟؟؟	Negative	STC
@STC_KSA السلام عليكم ، عندي النت مقطوع ، وله يومان كاملان ، ولم يتم إصلاحه ، حيث إني خاطبت ٩٠٠ ولكن يقولون : المقسّم عطلان ! ايش الحل ؟	Negative	STC
@STC_KSA السلام عليكم اخواني انا احد الساكنين في حي النسيم الغربي ونواجه ضعف في استخدام الانترنت ارجو زيادة الابراج وشكراً	Negative	STC
@STC_KSA السلام عليكم الاتصال ضعيف جدا ماهو الحل	Negative	STC
@STC_KSA السلام عليكم التطبيق غير متوافق مع كل الاصدارات	Negative	STC
@STC_KSA السلام عليكم انا عندي جهاز راوتر 4G وبطيء عندي جدا والي شغالين علية ٦ فقط فما بالكم ب ٣٢ شخص أتمنى حل مشكلتي وشكرا ❤️	Negative	STC
@STC_KSA السلام عليكم أنا عندي رقم ثابت فايبر أنا توقف عن السداد فترة وفصلتو الخدمة بعدها بثلاث شهور أرسلتو لي فاتورة بألف ريال بدون أي مبرر	Negative	STC
@STC_KSA السلام عليكم انا ماخذ باقه 100 ريال و توني اشتركت و كاتبين لي ان القيمه الغير مفوتره هي 1.45 والمشكله اني ما كلمت الا شريحه stc	Negative	STC
@STC_KSA السلام عليكم اود تقديم شكر لموظف بالاسم في احد فروع الرياض على الخدمة المقدمة منه هل بإمكاني التواصل معك على الرسائل الخاصة	Positive	STC
@STC_KSA السلام عليكم عند مشكلة في الانترنت يقطع فجة ويشتغل كيف طريق التوصل معا الدعم الفني	Negative	STC
@STC_KSA السلام عليكم عندي مشكله صارة مع مسوقه ممكن تزودوني برقم مكتب تسويق علما ان رقم الي اتصل علي 0112545667	Negative	STC
@STC_KSA السلام عليكم لدي مشكلة في النت السرعة اقل من 1 ميجا اريد رفع السرعة الى 4 ميجا	Negative	STC
@STC_KSA السلام عليكم لو سمحت انا عندي مشكله بالشحن كل مره اشحن تسحبون كل الرصيد وش السبب	Negative	STC
@STC_KSA السلام عليكم من اسبوع تقريبا شريت جوال s6ايدج بلس من جده فرع التحلية وفي المجلة مكتوب العرض قلت للموظف اعطيني العرض قال لايوجد	Negative	STC
@STC_KSA السلام عليكم من الساعه 7ال الحين لاتوجد خدمه على شريحتي ممكن تخدموني	Negative	STC
@STC_KSA السلام عليكم ورحمة الله وبركاته ممكن تفيدني بجهه اقدر اتواصل معها ابغا معلومات عن الشركه تفيد مشروعي شاكره لكم تعاونكم	Positive	STC
@STC_KSA السلام عليكم يرجى توضيح خدمة الانترنت بمنزلي الى 2 ميقا حيث انه الان اقل من 1 ميقا https://t.co/1xZJj3TeFK	Negative	STC
@STC_KSA السلام عليكم كل يوم يتم السحب من رصيديايش المشكلة؟ ؟وانا لم أسجل في أي خدمه	Negative	STC
@STC_KSA السلام عليكم. انا علي مديونيه ضالمه. مسدد الفاتوره. وملغيه. وبعدها تأتي فاتوره. ارجو منكم حل مشكلتي	Negative	STC
@STC_KSA السلام عليكم. يوجد عندنا برج STC فالحي طافي له اكثر من ثلاث سنين بالرياض حي ظهرة لبن	Negative	STC
@STC_KSA السلام عليكم..لدينا مشكلة في عدم وصول الرسائل النصية خاصة الرسائل التي يأتي منها ارقام سريهكيف يتم تفعيل ذلك	Negative	STC
@STC_KSA السلام عليكماتصل علي 900 وعطاني عرض التحويل من 10 ميجا الى 40 ميجا بزيادة فقط 10 ريال لتصبح 159ولكن اخر ثلاث اشهر صدرت فاتورة349	Negative	STC
@STC_KSA السلام عليكمقبل يومين سددت فاتورة تلفوني والان ارسلتوا فاتورة بقيمة اكثر من الحد الائتماني مع العلم ان استخدامي للهاتف استقبال فقط	Negative	STC
@STC_KSA السلام عليكملدي شريحة بيانات شحنتها 10 جيجا قبل اسبوعين وفصلت عليا رحت بصمت وما اشتغلت	Negative	STC
@STC_KSA السلام عليكمياخي عندي مشاكل مع شركتكم الموقرههل من الممكن الرد لأني اتصلت على 900 ويصرفوني	Negative	STC
@STC_KSA السلام وعليكمم اخووي انا عندي شريحه سواء اذاء تمم تشغيله يطلع رمزز البن واحطه يطلع غلط	Negative	STC
@STC_KSA الشبكه زفت عندنا هل من مجيب	Negative	STC
@STC_KSA الله فوق	Negative	STC
@STC_KSA الله لا يباركلكم فيها	Negative	STC
@STC_KSA الله لايحدنا على خدمتكم الزفت🙂💩	Negative	STC
@STC_KSA الله لايوفقكم لا دنيا ولا اخر و كل ريال زقوم ببطونكمانتو و من اسس هالشركه الزق و نت الزق الله يجمعكم بجهنم كلكم عشان م تغشونا	Negative	STC
@STC_KSA الله وأكبر وإحنا بإسكان طريق الخرج بالرياض لايوجد لدينا شبكة للجوال ولا نت ولا نت منزلي دي سي إل حسبي الله ونعم الوكيل	Negative	STC
@STC_KSA الله ياخذكم	Negative	STC
@STC_KSA الله ياخذكم.	Negative	STC
@STC_KSA الله يلعنكم لعنه فروعون وعاد وثمود ويلعن ذاك اليوم اللي دخلت شبكتكم بيتنا.سبعاه ماتستاهلون الزق يازقان	Negative	STC
@STC_KSA الله يورينا فيكم يوم انتم وابراجكم ✋🏻🤗	Negative	STC
@STC_KSA اللهم آمينبس برضكم شركة فاشلة	Negative	STC
@STC_KSA اللوحة أغلى من الجائزة 😕	Negative	STC
@STC_KSA اللي ركب فايبر بيننا وبينو ٣٠٠م وهوا الوحيد في المنطقة ايش الفرق بيننا وبينو هيا اقنعني https://t.co/wqKYa5QHWL	Negative	STC
@STC_KSA المشكله انها قدمة لي عرض وانا كنت بنقل الى مشغل اخر فا يوم قدمة العرض قلت لها خلاص سوي إلغاء نقل الى مشغل اخر وابي هاذا العرض	Negative	STC
@STC_KSA المنطقة اللي انا فيها فيها تغطية 4G وسرعة النت عندي ماتتعدى 1mb مع العلم اول ماشريت الشريحه كانت السرعه 4MB	Negative	STC
@STC_KSA المهم ابي سياره انا عميله منذ صغر هههههه	Negative	STC
@STC_KSA النت بالقطارة عطونا سرعه تستاهل ياناس زبطو النت	Negative	STC
@STC_KSA النت في الخرج متعطل من ثلاثه ايام ؟احنا ندفع فواتير؟والخدمه سيئه 😡	Negative	STC
@STC_KSA النطارة ولم يرسلوها من الشركة مع العلم مطبوع العرض في المجلة	Negative	STC
@STC_KSA الهواوي فصلتوه امس وابي اشوف المبلغ اللي علي وش الطريقة ؟	Negative	STC
@STC_KSA الى متى هيستمر النت بطئ 😡	Negative	STC
@STC_KSA الي يقهر كيف نلغي خدمة stc مجبورين نسدد الفواتير الي بدون وجه حق ٣ اسابيع وانا اطالب ولا احد مجيب على سو الخدمه المقدمه	Negative	STC
@STC_KSA اليوم بس بلعتكم 😍	Positive	STC
@STC_KSA اليوم رحت لفرع الدائري الجنوبي خدمات سوا معطلصلحتوه	Negative	STC
@STC_KSA اليوم هاديكم الله ايه هذا الشغل الزين. https://t.co/4oOufZj55h	Positive	STC
@STC_KSA ان شاء الله تموتون صلحوا النت	Negative	STC
@STC_KSA انا اشتركت بس اذا بفلوسماعندي لان لي شهر مخلص النت حقي	Negative	STC
@STC_KSA انا اشتريت من @flyincom بواسطة قطاف 10865 نقطه ،، انخصمت النقاط والمبلغ لم يصلهم والحجز انلغى ،،	Negative	STC
@STC_KSA انا عميل عندكم منذو مبطيعندي سؤالليش م تحطون خدمهه اصدقاء جددقووووسمم مليت من خوياي بغيرهم نفس الوجيهه من يوم م طبعت ع الدنيا…	Negative	STC
@STC_KSA انا عميلة تميز وحاولت اتواصل مع الكول سنتر بس انتوا عنجد نصابين 👊🏼 كله مشين	Negative	STC
@STC_KSA انا متضرر منكم وقدمة شكوى ٣ مرات ولم يتم حل موضوعي وتطالبوني بسداد مبالغ ماليه وانا سددت فاتورة الجوال وتم الغائه	Negative	STC
@STC_KSA انا مشترك شبكة داخليه ٢٠ميقا اول اسبوع أسرع من الطياره والآن وربي يالله يفتح الرابط حسبي الله عليكم	Negative	STC
@STC_KSA إنترنت سيئ اليوتيوب لا يحمل الا ربع دقيقة الله يعينا ولازلنا نتكلم مع أصحابنا على سوء الشركة دوماشكرا لكم	Negative	STC
@STC_KSA انتم اوصخ نت	Negative	STC
@STC_KSA انتم حراميه النت مروح نصب في نصب	Negative	STC
@STC_KSA انتم زبطو الفور جي اللي مايفتح الصور والروابط بعدين استثمرو	Negative	STC
@STC_KSA انتم نتكم ليه مخيس؟	Negative	STC
@STC_KSA انتو كلاب نصابين عطاني المصري ٣ شرايح قال مجانا شهر وبعد الشهر تبي تجدد ولا ارمها وكتشفت من الزملا انه اجباري ولا تصير مديونيه	Negative	STC
@STC_KSA اي احد يعطيكم هويه واسم مشيتو ورآه ؟؟ب لله عيكم لو مسروقة ؟؟المفروض تبحثون اسمي وتصلون وتتاكدون !!	Negative	STC
@STC_KSA ايش اسوي ياعالم خايفه يخبلي مصيبه	Negative	STC
@STC_KSA أيه هين ما نفعتونا عشان تنفعون جنودنا ،، ؤالله عيب تفصلون رقم من الخدمه من غير ما ترسلون رساله مثل باقي الشركات	Negative	STC
@STC_KSA بالتوفيق	Positive	STC
@STC_KSA بالله ردو	Negative	STC
@STC_KSA بالمدينه العسكريه تمام بس الحفر تعبان ي ليت تشوفون وضعه	Negative	STC
@STC_KSA بخشم الريال تخدمون مو بلاش ياانصب شركة	Negative	STC
@STC_KSA برنامج خدماتي في التحديث الأخير لايمكني من التحكم بجميع الأرقام باسمي فلماذا؟	Negative	STC
@STC_KSA بس اصملوا تكفون وترا احبكم يكلاب حسبي الله عليكم ❤️	Negative	STC
@STC_KSA بس برضوا كسم نتكم المخيس .	Negative	STC
@STC_KSA بصراحة انا معجب جداً في خدماتكم الرائعة والتغطية بجميع أنواعها للشبكة والإنترنت 👍🏻 انتم بالنسبة لي المركز الأول	Positive	STC
@STC_KSA بصقه بحجم السماء الله ياخذكم🔪💦.	Negative	STC
@STC_KSA بطلو نصب وسحب الرصيد ربنا يردو فيكم	Negative	STC
@STC_KSA بطلو هبل وخل عنكم المسابقات ولعب البزران وصلحو الشبكه	Negative	STC
@STC_KSA بعد تعيدون نفس الحركه تقطعونه علي لعانهماقول الا يجعل كل ريال خذتوه مني ماهو حلال عليكمو جعله زقوم عليكم كلكم من اولكم لاخركم	Negative	STC
@STC_KSA بعض الموقع على dsl stc لاتعمل مثل سينما 4 وايضا سبق لماذا !!!!!!!!!	Negative	STC
@STC_KSA بينجلد خل عنك بس	Negative	STC
@STC_KSA تبي توصلون النت ل الفضاء وصلوه لبيتنا بجنبكم بعدين هايطو	Negative	STC
@STC_KSA تدرون صرت مٌغرمه بكم؟ ❤️	Positive	STC
@STC_KSA ترفعون من قيمة الشرايحوالشبكة زفت 👎	Negative	STC
@STC_KSA تستهبلون انتوا علينا؟؟ تقولوا اتصلو ع ٩٠٠ للاستعلام واحنا متصلين ع نفس الرقم(٩٠٠) استهبال هو ع الخلق و الا ايش اخدموني اللحين بسرعه	Negative	STC
@STC_KSA تسلم الحبيب	Positive	STC
@STC_KSA تصل رسائل من STC تويتر ازعجتنا نرجو ايقافها الآن.	Negative	STC
@STC_KSA تطبيق اكثر من رائع	Positive	STC
@STC_KSA تعالوا خذوا المودم حقكم😡	Negative	STC
@STC_KSA تفو 💦🐾🐾	Negative	STC
@STC_KSA تكفففوون شوفوا حل لسرعة النت عندنا مرررا بطيء ويقهر .	Negative	STC
@STC_KSA تم إلغاء الباقه اللي كنت استخدمها وتحويلي لباقه اخرى دون أخذ رايي او أشعاري بذلك ، هل ترى هذه الطريقه مناسبه للتعامل مع العملاء	Negative	STC
@STC_KSA حارتنا بالسويدي طافي علينا النت له ٣ ايام العن امكم انا ؟ طالبين فني ولا جاء الله يلعن من رباكم	Negative	STC
@STC_KSA حاولت مايتصل ليه ؟	Negative	STC
@STC_KSA حبيبي ، كيف أفعل الواتس ؟ وبكم ؟ مشكور مقدماً 💜	Positive	STC
@STC_KSA حراميه بعد كل ماشحن شحني بح وين يروح وجع 💵	Negative	STC
@STC_KSA حسبي الله عليكم	Negative	STC
@STC_KSA حسبي الله عليكم اخذتوو نتي عع الفاضي	Negative	STC
@STC_KSA حسبي الله عليكم قاطعين النت عن البيت من امس والى الان المشكله مسددين الفاتوره!!ليش الملعنه يا كلاب؟ شابكه ع الهواوي عشان العنكم	Negative	STC
@STC_KSA حسبي الله عليكم معقولة ما عندكم ذمة وضمير ومصداقيه لدئ موظفينكم 😡😡😡😡😡😡	Negative	STC
@STC_KSA حسبي الله عليكم من شركة.	Negative	STC
@STC_KSA حسبي الله عليكم☹💔	Negative	STC
@STC_KSA حسنوا شبكتكم في #الحد_الجنوبي وخلوا الهياط عنكم شكراً @ZainKSA تفاعلت معنا وركبت برج 4G بدون اي مطالبه #عاصفة_الحزم	Negative	STC
@STC_KSA حسو شوي https://t.co/ESmOHHRBaD	Negative	STC
@STC_KSA حلو مشاكلنا ي الاتصالات السعودية و بعدين تعالو تكلمو جزاكم الله خير	Negative	STC
@STC_KSA حي الدار البيضاء الجديده الرياض الي فيها جامع آل سويدان الشبكه الانترنت ضعيف جداوجدا	Negative	STC
@STC_KSA حي النظيم تبوك مافي ابراج STC	Negative	STC
@STC_KSA خايفين على شبكتكم الخايسه اللي هناك ماتغردو عبث ياحراميه	Negative	STC
@STC_KSA خدمة التمييز من الساعة 11:36 ولم يتم خدمتي حتى الان https://t.co/bACNfq2nIb	Negative	STC
@STC_KSA خدمة العملاء في منتهى السوء.....نرجو من الشركة المحترمة...الاهتمام بعملائها اكثر من ذلك واختيار موظفين ذو كفاءة ولباقة في التعامل	Negative	STC
@STC_KSA خفوا علينا يا أبل 😂😂	Negative	STC
@STC_KSA خلاص يا ورع	Negative	STC
@STC_KSA خلو الابتكار على جنب انتم ضبطو شبكتكم ياخي	Negative	STC
@STC_KSA خلو الكورة اللحين !! حنا بلشنا بشبكتكم السيئة !!	Negative	STC
@STC_KSA راح نرفع روسكم ياجحلط	Negative	STC
@STC_KSA رحت أحدث بياناتي و تجلس الشريحه عند الموظف و هذا اليوم الثاني عندهم و للحين ما سلموني إياها ،ؤش هالقرف الله يقرفكم جعلكم الوجع بعد	Negative	STC
@STC_KSA رقم الطلب لتركيب هاتف لمنزلي من اربعة اشهر ونصف اكثر من ١٤٠ يوم ولافيه اي تجاوب من الشركة ولا تقدير للعميل	Negative	STC
@stc_ksa زان النت عند الجيران واحنا لا؟ لتحل عليكم اللعنه	Negative	STC
@STC_KSA زرقو الأرباح حقكم وعدلو النت مد رجلك ع قد لحافك قال ارباح نصابين 😈❎❎❎❎	Negative	STC
@STC_KSA زهقنا من رفع الطلبات وللأسف أن يفتح البلاغ ويغلق بمزاج الشركة	Negative	STC
@STC_KSA زينو اتصالاتكم بعدين ادعو	Negative	STC
@STC_KSA سرعة التصفح بطيئة جدا ، الدمام حي الأمير محمد بن سعود	Negative	STC
@STC_KSA سرعة النت عندي لو أتسابق معه في طريق كان سبقته 😄	Negative	STC
@STC_KSA سلام عليكم انا مشترك في الالياف البصريه بس تقريبا كل يوم من الساعه ٢ الى ٤ العصر يصير النت سلحفاة وش الحل 🙃	Negative	STC
@STC_KSA سلام عليكم عندي مشكلة رقمي صار فجأة خارج الخدمة كيف ممكن أتواصل معكم	Negative	STC
@STC_KSA سلام عليكم فرعكم سيئ للغايه وتعامله زفت فرعكم بمكة حي الشرايع شوفوله حل كرهني بشركتكم	Negative	STC
@STC_KSA سلام يا اتصالات انا مواطن وحاب افيدكم عندنا عدد١٢عماره في موقع مميزتعالوا استفيدوا قبل mobilyوركبوا لنا الياف/جدة خلف قاعة نرسيان👍🏻	Positive	STC
@STC_KSA سنة كاملة لم يتم تركيب خدمة الإنترنت كارثة	Negative	STC
@STC_KSA سنه 1500 بس النت مره بطي واوقات يفصل ورجعت واشتريت ثلاث شهور مفتوحه والنت بطي شغال عليها ثلاث اجهزه	Negative	STC
@STC_KSA سواء كنت عميل تمييز او عميل عادي التعامل سئي جدا.ما فائده المكاتب للشركات المقاوله اذا كان لابد من مراجعه الفروع الرئسيه .	Negative	STC
@STC_KSA سؤال ليش شبكتكم زفت في جده سرعه غير محدوده واخرتها حتى واحد ميقا ما توصلها حسبنا الله عليكم ونعم الوكيل بس ينتهي استراكي وتوبة 🏃🏻🏃🏻	Negative	STC
@STC_KSA شبكة ممتازة	Positive	STC
@STC_KSA شبكتكم زي الخرا ياحباني	Negative	STC
@STC_KSA شرائح ال stc الجديدة يا اخوان سيئة ونصب	Negative	STC
@STC_KSA شركة الإتصالات السعوديةبيني وبينكم الحق	Negative	STC
@STC_KSA شركة الإتصالات السعوديةبيني وبينكم عقدهل تريدون الذهاب للمحاكم كي نأخذ حقوقنالماذا تقدمون خدمة وأنتم غير جديرون بها	Negative	STC
@STC_KSA شركة الإتصالات السعوديةللأسف خدماتكم سيئة جدالانافع معاكم شكاوي ولا نافع معاكم زيارة مكتب الإشتراكاتماهو الحلندفع رسوم بدون حق	Negative	STC
@STC_KSA شركة بكبر شركة آس تي سي من العيب تقديم هذه الجائزة	Negative	STC
@STC_KSA شركة سيئة... وراح تضلون سيئيين.... لي سنة اطركم مهندس عشان يجي يشيك ع النت عندي بس الزباله زباله	Negative	STC
@STC_KSA شركتكم الموقرة حملتني فاتورة ب٥٩١ريال على هاتفي الثابت رغم اني الغيته منذ سنتين وكلها رسوم خدمة	Negative	STC
@STC_KSA شركه تعبان الله يعين بس عليكم ^ ^« »~	Negative	STC
@STC_KSA شريت شريحة بيانات مفتوح ب٣٠٠ ريال ولاتعمل ما الحل	Negative	STC
@STC_KSA شسالفتكم موصلين الياف ف حارتنا وصلتوا عند بيت جيرانا ووقفتوا ! شنو من باكستان احنا ولا من موزنبيق ! عشان ماتوصلون الياف لنا 👊🏻	Negative	STC
@STC_KSA شفيكم زعلانين؟؟؟؟	Negative	STC
@STC_KSA شكرا stc علي كل موظف تم الاتصال علي لدرجه امس يكلمني مشرف يقول ماتبي الرقم ويكررها مسوي يهدد عيب والله ويقفل السماعه ويقول بالغلط👎	Negative	STC
@STC_KSA شكراً لجمال نتكم شكراً بحجم السماء واكثر كل السنابات تفتح ومقاطع اليوتيوب ابو كم ثانيه تفتح جدد شكراً هففف 😔❤️❤️	Negative	STC
@STC_KSA شكرآ لكم	Positive	STC
@STC_KSA شكرا ماقصرت	Positive	STC
@STC_KSA شوفو التصويت واعرفو حقيقت شبكتكم المخيسه 👎🏼	Negative	STC
@STC_KSA شوفوا لنا حل مع البرج الذي لايوصل لنا خدمة لجوالاتنا بإسكان طريق الخرج بالرياض العاصمة ولاديوجد لدينا نت وتأخذون مالنا بدون حق	Negative	STC
@STC_KSA شوفولكم حل مع اتصالكم فالزلفي مروح 4g ويالله يفتح اليوتيوب	Negative	STC
@STC_KSA صباح الخير لو سمحتوا تعرفون احد في @Mobily يرد علينا من امس امنشهم محد يرد	Negative	STC
@STC_KSA ضعيفة جدا	Negative	STC
@STC_KSA طحلب	Negative	STC
@STC_KSA طفح الكيل منكم ومن النت حقكم وحسبي الله ونعم الوكيل فيكم	Negative	STC
@STC_KSA طيب الحين انصب عليه والا كيف	Negative	STC
@STC_KSA طيب الشبكة زفت كيف احمل تطبيق	Negative	STC
@STC_KSA طيب ذحين خلوكم من المباريات وقولولنا ليش برنامجكم may stc ليش مايشتغل	Negative	STC
@STC_KSA عدلو خدمتكم بعدها فكرو تشجعون	Negative	STC
@STC_KSA عدلو شبكاتكم بعدين عطونا عروضكم	Negative	STC
@STC_KSA عدلوا النت حقكم يكلاب ولا والله لا احول على موبايلي وتخسروني ،، حذرتكم ترا	Negative	STC
@STC_KSA عزيزتي شركة stc هل ترضين انه تجيني اعلانات شبه يوميه من ارقام وشركات غير معروفه؟!	Negative	STC
@STC_KSA عزيزتي شركة الاتصالات السعودية ما اقول غير " الله يسلط عليكم " &lt;== بصوت سلوى المطيري😡😡	Negative	STC
@STC_KSA عزيزي عندي باقه جود نت عطلانه من الصباح لماذا ..؟	Negative	STC
@STC_KSA عساكم تردون ع حسابكم ف التويتر خل التطبيق اللي تتعب حتى توصل ل الخدمة يمدحون @Mobily في سياسة الخدمة والرد السريع	Negative	STC
@STC_KSA عسى ماتكلفتو	Negative	STC
@STC_KSA عطتني رقم اخر لهم بس اتصل عليه ويقول انه خطاء 92005200	Negative	STC
@STC_KSA عطوني بطاقة عشرة بس على هالملاحظة 😂✌️	Negative	STC
@STC_KSA على الاقل ديمون اتصاله وصل الارض 😂 حنا ظروفنا صعبة مع شبكتكم!!	Negative	STC
@STC_KSA علي اختبار فيزياء كلمو الاستاذ خلوه يأجله 😊عشان اتابع المباراة	Negative	STC
@STC_KSA عميلنا العزيزتم فتح طلب خلاف رقم 1-354793583640 حسب رغبتكم. هذا الخلاف له شهر بدون تجاوووب كذااب في كذااب كل شوي موظف يسلك لنا	Negative	STC
@STC_KSA عن النصب بس	Negative	STC
@STC_KSA عن قلة الادب و ردوا 😒	Negative	STC
@STC_KSA عندي جوال انفصل بسبب ما شحنته مده شهرين وللاسف انسحب مني والرقم مميز و الحل	Negative	STC
@STC_KSA عندي شريحة بيانات مفوترة فيها مشكلة الاتصال بطيءولا لقيت حل لها	Negative	STC
@STC_KSA عندي شكوى رقم 7428885 ولاحد كلمني ولارد علي من ٢٠ يناير	Negative	STC
@STC_KSA عندي شكوى من كم يوم طلعت الشريحه بدل تالف وانسحب الرصيد الي فيها كل يوم ويستحب الرصيد شحنت كرت اخر انسحب ايش المشكله؟ ارجو الرد	Negative	STC
@STC_KSA عندي لكم فكرة حلوة ، إنشاء شركة طيران وفنادق ومكاتب سياحية 😃👍🏻	Positive	STC
[truncated: 18,001 more rows]
